# Supplementary material
Source: publisher figshare collection journal article supplement (https://tandf.figshare.com/ndownloader/files/13764047)
Supplement: Supplementary file 1 [file 13764047]

## Sheet: Table S1
Table S1: Full list of genes of Cluster 8 which is activated after exposure to free GSNO for 4 h.
6470 genes
XLOC_l2_005933
KLK13
XLOC_002729
LOC286135
XLOC_006724
XLOC_002256
C15orf61
LOC100499194
CNOT4
LSM14B
MXRA7
TOE1
LOC339505
LOC100132474
STON2
UNC13B
WDR33
XLOC_003273
RRP1
SDK1
XLOC_l2_012388
MBD6
METTL19
ENST00000372591
XLOC_l2_011424
A_33_P3384628
LOC100506191
ERVK13-1
MLYCD
LOC441204
AB529232
LINC00222
PCDHGA7
LOC100128988
ELK1
PFKFB3
MMP21
XLOC_002319
XLOC_001856
A_33_P3673544
XLOC_004169
PAGE3
ITGAX
STX18
ADAMTS15
HS3ST2
XLOC_003669
ICOSLG
XLOC_l2_007706
ENST00000390442
ABCA8
ENST00000390606
C7orf33
CHRM5
LGR5
FRMPD2
LRRC2
XLOC_001614
XLOC_010714
XLOC_002369
RASSF8
ZNF235
XLOC_004701
LELP1
BEND3
C8orf74
XLOC_006391
EPM2A
KDM2B
XLOC_009183
FGF18
LOC401134
YJEFN3
XLOC_007646
KIF19
ENST00000325811
TTTY8
XLOC_012398
XLOC_001847
LOC389906
XLOC_l2_007770
RD3
GPR182
GALNT9
NUS1
LRRFIP1
GCFC1
XLOC_l2_006404
MON2
RMND5A
ARPC1B
THC2524986
XLOC_l2_015090
PMS2
TMEM106A
PDXDC1
ZFX
RN5-8S1
CANX
BAG3
NOP14
C2orf29
SCARNA12
XLOC_000495
TBC1D22A
XLOC_l2_004854
NUP133
AHCTF1
SAMM50
PIK3CA
RNMT
KLHDC4
ARHGAP35
RREB1
LOC399744
PNMA1
TMED7-TICAM2
SNX9
VHLL
XLOC_l2_013728
KIAA0317
FLJ41327
MAML1
LOC100133050
CTNNA1
TXNDC11
SLC30A7
NF1
XLOC_004956
TNFRSF1B
HCG18
FRY
ATP2B4
EI24
FGF23
TJP2
LOC202781
PMS2
ATP6V1E1
PMS2
CROCCP2
XLOC_013429
ZNF836
FAM91A1
PTPN2
XLOC_006132
REST
ABR
PSPC1
A_33_P3235521
CLCN6
ZNF74
RAB12
XLOC_007534
KCTD3
CCDC104
DNAH17
LOC100506710
XLOC_l2_015491
NECAP1
PPP2R2D
XLOC_006997
DDX19B
GMEB2
UEVLD
ELK4
GNAS
XLOC_007586
ZNF615
SLC25A16
AHNAK2
SMG1
SNHG4
LOC100128139
CELF2
UBR5
XLOC_009911
A_33_P3299042
ETFA
TMEM150C
CSF2RA
CNPY3
GNB2
ERF
C9orf102
POTEF
CNTNAP3
BAGE
BROX
SNORD45B
KANSL3
YY1AP1
TUBB2A
XLOC_l2_001399
LOC389906
IFRD2
LRRC37A3
XLOC_004384
LOC388692
ZNF192
CHD1L
FAM40A
2007-09-01
A_24_P518369
GALR2
KCNMB3
AAK1
SNORD75
FIGNL2
SMAP1
XLOC_l2_009184
GSTM1
HMBOX1
UBE2Z
STIP1
MCFD2
MARC1
UBXN7
MDM4
XLOC_l2_005350
ROBO1
GSTM1
CERS6
PSMD2
A_24_P272352
PRPF3
TARDBP
TBC1D1
C9orf114
FAR1
TBL1Y
MRPL46
MAML1
NSUN4
XPO5
POLR1E
LOC100507101
TAF1
TMEM185B
EIF2B3
EEF1A1
CSNK2A1
MCFD2
SLC44A1
HVCN1
ITM2C
CSNK2A1
HIST1H2BO
DPP7
PVT1
KIF22
TBL1Y
TMEM57
SRP72
COMMD7
RQCD1
PVR
TOMM40
ZNF532
SLC25A46
HEATR2
LOC729513
MPZL1
PPT1
POLR3H
AGMAT
P4HB
HMGN3
DBNL
IKBKB
PHLDB1
PEA15
HSD17B12
ZNF195
ORMDL3
CSDA
PMS2P4
RAB44
PSIMCT-1
PTPN11
HOMER3
LPHN2
SEPT7L
CRKL
JUNB
ELOVL1
C2orf18
CSNK2A1
PISD
KEAP1
P4HB
IL6ST
PUS1
LOC100505717
AK074630
RHOC
NSF
NEK2
ZNF195
SDHC
SRSF1
TBC1D22A
COPS2
CYB5R4
SFMBT2
ZNF586
JPH4
SETMAR
PTCD3
PRKAG2
XLOC_005327
SYNGAP1
FLJ90757
LOC728407
TUBB8
INTS6
TBL1Y
UTRN
TFAM
RASSF4
WNT3
ATP2B4
DSC2
TBL1X
A_33_P3389668
AGBL5
FAM35A
GALE
XLOC_011726
EIF5A
GSTM1
C10orf12
ATP2B4
ENST00000427415
XLOC_006259
E2F6
CDK12
A_33_P3315659
MLLT10
GSTM1
CEACAM3
ZFP82
LNPEP
HIST2H3A
VAMP1
FDXACB1
PDPR
LOC729696
USP49
SCARNA1
USF2
ST3GAL3
MIF4GD
CRYZL1
ATP2B4
MOV10
BSDC1
TAB3
CROCC
LOC401397
PPIA
PPIA
SEPHS2
CXorf21
ATP2B4
FAM95B1
C10orf12
NOS2
RASSF3
C14orf49
XLOC_003358
THC2688558
XLOC_l2_015585
SCGB1D2
GJB2
CELSR1
SRD5A3
FIG4
GNAS
CTSA
AY358253
ZNF385D
DB072080
BICD2
FARSB
A_32_P31992
CC2D1B
PEA15
XLOC_l2_015892
XLOC_l2_008289
KIAA1530
CLN3
FLJ36000
LOC100132815
ENST00000411845
ITIH6
NP1245239
EVX1
METTL19
P4HB
QRFP
TTC3
ENST00000505053
XLOC_013429
ZC3H10
PAX4
XLOC_004299
ST6GALNAC4
PPCS
A_33_P3316696
DOC2A
XLOC_l2_001890
OTOGL
NP105946
SLC5A6
PLA2G10
XLOC_l2_013808
XLOC_005338
CDHR2
XLOC_l2_003757
RPL23AP32
C12orf52
UCP3
ZNF630
MDH1B
LOC731656
XLOC_l2_011872
XLOC_012142
USP47
ND4
LOC100289019
NPHS2
BCAP31
XLOC_l2_009762
C21orf63
C15orf62
A_33_P3248939
TPP1
NFX1
LINC00355
C6orf208
CCND1
CDK3
SNORA42
AF176922
KIRREL2
LOC400464
A_33_P3367970
LOC100129516
ZNF585A
FLJ23867
THC2528869
PPP2R5B
XLOC_l2_008427
A_33_P3312754
LOC729173
PRSS55
XLOC_l2_005787
ANP32A
ZNF850
MGC16025
XLOC_002742
XLOC_009509
XLOC_014420
XLOC_013785
PPAN
ENST00000449095
C21orf104
ADH1C
FCRL6
DEFB122
XLOC_011835
DFNA5
GIPR
ENST00000535853
FLJ25917
SPON2
LOC100128851
FAM21C
TMEM190
RABGEF1
SERINC5
HMHB1
LOC728739
A_33_P3357964
A_32_P918263
SERPINE1
XLOC_l2_010854
NOS1
FLJ33630
SAMHD1
LOC100506834
LOC728054
MTRF1L
LCK
EIF2C1
XLOC_005184
ATP7A
GPR78
XLOC_007722
ENST00000378432
TBX6
EDARADD
ADAMTS7
GPC5
GOLGA8F
BJ995728
A_24_P255303
THC2641208
UGT3A1
GPRC5D
CRLF2
XLOC_012332
LOC100131608
CRCP
GH2
FLJ43826
SLC1A5
DAB2IP
MALAT1
XLOC_001728
SPRN
CARS
PRMT5
ZNF600
CCND1
RHPN2
TRMU
PPP1R21
RG9MTD1
XLOC_l2_010330
TMEM185B
BTBD9
SIRT7
ZNF597
HIST2H2AC
A_24_P49267
CLDN18
XLOC_014169
XLOC_002497
ANXA13
XLOC_000845
LDLRAD1
XLOC_013823
EFR3B
C12orf37
ABCA2
SEMA7A
HIST1H4I
USP41
TMEM61
SNORD114-13
KNG1
LOC96610
HPGDS
A_33_P3300022
A_33_P3332989
XLOC_l2_011798
LOC729177
NBPF6
THC2520108
UBQLN2
ZNF585B
SRRT
LMO2
ZNF841
LOC440335
CCT2
NIPSNAP1
GATAD1
CATSPER2
RBM39
ELAC2
EIF2B3
CBFB
PARL
LOC202181
SLC35E1
TM7SF3
INTS6
XLOC_l2_000010
ZNF853
CAT
TTTY15
PPM1L
MERTK
WSCD2
XLOC_012097
LOC100132147
UGT3A1
SNORD38B
AK090403
PHKG1
AK097792
LOC100129027
ENST00000523617
TP73
MORN1
ANKRD2
XLOC_l2_009050
XLOC_004190
A_33_P3260509
XLOC_013506
KPRP
GYPA
CHIT1
XLOC_002055
LOC100507086
XLOC_l2_007184
MYLK
C21orf15
FLJ43315
KRT19
A_33_P3328751
AK126686
APOA1
DPCR1
RNF157
WIPI2
ENST00000356822
H2BFXP
DA067175
XLOC_003093
SALL4
NP336097
LOC729178
EXOSC5
C17orf51
SUPT5H
CD28
LINC00470
XLOC_007054
A_33_P3276062
LOC100507420
XLOC_003365
XLOC_001873
GALNS
XLOC_l2_000581
XLOC_l2_011854
XLOC_l2_010018
XLOC_012626
XLOC_002601
XLOC_009562
DCLK2
NKX2-8
KCNK3
CYP1A1
BCAM
DPCR1
LOC401180
ADCK4
CHGB
XLOC_008686
FHL3
QRFP
XLOC_005037
CHD5
LOC100131910
AKAP12
KCTD13
OLAH
LOC100506007
LOC645206
NTRK1
SYBU
PPM1M
ENST00000555157
XLOC_l2_014048
ZNF780B
XLOC_004629
UNC119
ESRP1
SAMD1
PYGM
XLOC_003898
KCNQ1DN
IDS
LOC100506923
C20orf26
B3GNT9
DKFZp667F0711
OR2D2
BSX
UBXN11
APOA1
UCK1
XLOC_012175
AKAP12
XLOC_002995
LOC100505718
LOC643719
MAPKBP1
SLC12A7
XLOC_009769
SEC14L5
OR2T27
XLOC_001674
XLOC_002160
LOC440792
XLOC_007017
ITGB6
SRRM3
LY6H
XLOC_003405
LRRC8E
ENST00000445770
GAK
C17orf51
PRSS3
GRHL2
A_33_P3340828
A_33_P3330084
VNN2
ABCB5
XLOC_l2_007541
XLOC_001474
TRIM55
CD300C
ARAP1
XLOC_011708
ENST00000519491
XLOC_l2_015142
DNAH17
XLOC_013649
PPP3R2
FAM73B
XLOC_005807
XLOC_001351
AFAP1-AS1
GCNT4
XLOC_l2_015288
PARP3
LINC00475
GATA4
THC2638856
DIS3L
DOK7
A_24_P169843
XLOC_l2_013124
XLOC_l2_002069
DEFB115
GLYCTK
EFNA1
HSPB8
CYFIP2
SLC22A11
AKAP12
PGAM5
BMP1
SMYD5
BC042181
CFLAR-AS1
XLOC_l2_002477
LAMC3
IL1F10
CCDC42
A_33_P3345638
XLOC_001894
THC2652478
XLOC_005332
PPM1M
XLOC_001930
PAX5
SLC4A3
A_33_P3855484
COL11A2
XLOC_009683
A_33_P3327971
PCNA-AS1
HMGB4
ZP2
A_33_P3303361
XLOC_010194
ENST00000382678
WDR13
UQCC
ADAMTS6
TMEM194B
CDCA5
KRT18P55
ENST00000390378
RCVRN
CYTL1
CD3G
KIAA0087
PMM1
FILIP1L
XLOC_008488
XLOC_002300
STAP2
TP53
XLOC_005942
ENST00000371390
XLOC_l2_014369
XLOC_003262
POM121L8P
EFNA1
XLOC_l2_005933
WBSCR17
UBQLN4
Q6LRY1
RETSAT
ENGASE
XLOC_004916
CAMSAP3
AY203961
AK125749
HDAC10
HSPG2
FGF8
XLOC_006771
PKD1
LINC00313
ADORA2A
DNAJB13
ENST00000383146
AF085654
XLOC_011766
ABCB9
LOC285889
NT5C1A
CSAD
NBPF7
NKD2
LOC100130701
ENST00000446344
TBC1D3P1-DHX40P1
CD8B
LOC100507375
HILS1
XLOC_007026
BANF2
LOC391767
NKD1
TPRX1
XLOC_007323
XLOC_007554
A_33_P3292994
ALDH3B1
A_33_P3259239
SCAND2
C10orf95
WWP2
XLOC_l2_009946
THPO
C3orf45
XLOC_008007
KIAA0125
RAP1GAP
CEACAM7
XLOC_l2_006021
XLOC_013808
ALPL
LOC115110
HDHD3
MXD3
A_33_P3387786
ACCN3
A_33_P3333003
XLOC_l2_015127
SLC26A1
XLOC_l2_003052
XLOC_004297
XLOC_006035
PRAMEF12
XLOC_l2_013481
LOC100129069
TRIM55
CDKN2A
XLOC_l2_011027
NADK
LTBP3
XLOC_013521
XLOC_014119
VNN2
DND1
OR2T1
LRRC32
LOC729506
LOC728684
ENST00000390256
PLEKHG3
LHX5
C20orf196
XLOC_014348
CABP1
XLOC_l2_009867
MPPED1
ZNF620
KIAA0664
CHMP1B
SIGLEC11
LOC442028
BCRP2
LRPAP1
LOC100507299
XLOC_l2_004954
TMPRSS15
XLOC_011635
HABP2
C16orf96
LOC645752
DHDDS
XLOC_002981
LOC100130581
CUX1
HMX1
XLOC_000301
XLOC_014172
XLOC_005633
ALDOB
SAMD4B
XLOC_007507
C17orf57
CYP3A5
ZC3H12D
C6orf89
MYH11
AK310283
MPRIP
LOC100132526
LOC151760
RNF213
ACBD4
RAB11B
GRK7
SLC16A13
AXIN1
C19orf26
ATP2A1
XLOC_001412
SMR3B
ENST00000390323
XLOC_012249
ABCB5
GSG1L
XLOC_006879
NPR1
XLOC_014265
XLOC_l2_003911
TCF7L2
LOC653712
XLOC_013958
PRKCZ
XLOC_003314
PSORS1C3
PLIN1
THNSL2
FARP2
ATXN1
A_33_P3238773
VNN2
LOC728342
IGFALS
FAM183A
CTNND1
XLOC_003829
XLOC_003123
FLJ46906
XLOC_013811
LOC649294
NINL
XLOC_009340
LOC286359
FLJ41423
XLOC_013723
SPDYE2
ENST00000450891
ARHGAP23
OC90
A_33_P3413104
EFNA1
FBXL22
CCR5
ZBTB48
MYO1B
KIRREL
LOC645638
XLOC_010301
VPS8
XLOC_010211
KIAA0895
PPP1R13B
C11orf94
THC2752020
EXT1
OSBP2
A_33_P3213526
DDX11L10
TNNI1
C16orf82
TTBK1
BCKDHA
XLOC_008695
DMGDH
PMPCA
LOC100509378
TNFSF18
XLOC_002975
TXNDC2
XLOC_007401
EFNA1
PRM1
CHDH
PMS2L2
ZNF641
ANKRD53
LOC100506835
PXN
XLOC_l2_005341
ASPSCR1
ENST00000399711
SLC14A1
THC2555232
XLOC_001342
LOC100131242
PTH1R
PRKAR1B
COL25A1
LRRTM4
GREB1L
MST1P2
GRRP1
PPBP
PSMF1
CMKLR1
CUL9
AACS
SERPINA10
XLOC_009937
CRTAC1
MAGEE2
XLOC_l2_015706
KRT8
VWA5B2
ARFIP2
C6orf81
LOC729732
PDE4A
THPO
XLOC_000167
TSSK3
XLOC_l2_015700
DPCR1
XLOC_002685
LOC100507236
SNORA58
A_33_P3237605
XLOC_011358
DHRS2
INPP5J
IL32
ENST00000519738
LOC100130741
DNAH2
XLOC_002067
CR745051
CHST10
XLOC_013333
LINC00483
TMEM120B
XLOC_005729
FKBP9
HRASLS2
OSMR
PDZK1IP1
XLOC_004242
C19orf77
XLOC_010210
XLOC_004726
PIEZO2
ENST00000525429
GRIK4
WDR55
XLOC_000930
CAMTA2
A_33_P3269528
XLOC_003052
PLXNB2
XLOC_009197
XLOC_012298
XLOC_003867
XLOC_000771
XLOC_008349
LOC100509861
THC2560209
UPB1
OR4M1
WNT10A
IL6
DPCR1
RUNDC3A
HNF1A
XLOC_002952
CANT1
POLR3B
ABCB5
APOA4
GPR17
XLOC_l2_014219
PARP6
SH3TC1
THEM5
EIF4E1B
XLOC_005877
MEIS1
LOC729799
ABCB1
XLOC_000622
XLOC_009344
ZP3
GUCY1A3
BRPF3
ENST00000455074
IL5
CDK5RAP1
CU692315
CWH43
UBE2E4P
TTC39A
XLOC_010154
SDC3
XLOC_011181
PDZRN3
DPCR1
PAX9
OR10AD1
XLOC_010078
SHBG
RGS9
XLOC_001715
ABCB1
A_33_P3320599
ERMN
DTNB
LRP1
XLOC_006971
TP53I13
TRIM9
XLOC_009344
CRHBP
APLP1
SMPDL3B
LINC00478
XLOC_006757
METTL6
SGSM2
LOC100505635
LOC100499467
C4orf50
KLRF2
ADAMTSL1
XLOC_008151
XLOC_009375
LOC643623
LOC283177
EHBP1L1
AMT
SETD1B
FBXL18
FAM115A
MDFI
ZNF385C
AK126599
XLOC_009514
XLOC_003438
KIFC2
XLOC_001208
XLOC_011176
XLOC_006507
LOC100129995
LOC100292922
APBB3
PRKCSH
MRO
XLOC_l2_014234
GPD1
UGT2B15
CLEC4A
THC2621582
A_33_P3315915
LOC100127910
PLEKHG7
C14orf79
ENST00000422757
LOC100129055
FLJ13224
TRPC4
XLOC_l2_008639
PTCH2
CCBP2
HCRTR1
XLOC_006644
PRR15L
XLOC_006928
XLOC_011117
LOC100507959
XLOC_011674
LOC100133050
LOC728228
XLOC_006010
UPB1
H19
XLOC_006883
XLOC_012453
FAM19A4
XLOC_l2_011967
THC2752005
XLOC_012006
ACAD10
CNTD2
EPHB1
THPO
XLOC_013786
XLOC_005791
LOC399900
XLOC_000303
XLOC_010984
FAM3A
EDA2R
LOC100272228
NEO1
SLC27A3
EML6
TNXB
CD8B
KIAA1671
UPB1
CDH26
LOC100506924
LOC100127885
LOC100652983
C10orf92
ZNF646
XLOC_001363
CDX4
XLOC_008873
ENST00000528912
XLOC_005939
SUV420H2
CACNA1G
XLOC_009964
XLOC_000980
SP8
XLOC_000950
XLOC_012564
LOC100507165
AOC4
C8orf12
BC066878
APOA1
EVC2
XLOC_l2_013300
THNSL2
XLOC_001153
KLHDC7B
IQCA1
XLOC_014048
PVRL3
OR4S2
KCNA6
XLOC_008394
XLOC_008777
EMID2
AQP4
XLOC_007493
LYZL2
SLC22A23
ZNF7
LOC388948
XLOC_010305
XLOC_011816
XLOC_012610
HMGB4
POU4F3
ALOX12B
XLOC_l2_010061
ENST00000391684
RACGAP1P
NUDCD3
THC2540172
GCNT4
SLA2
ENST00000390348
SP3P
C2orf51
A_33_P3382634
KIAA1530
AFAP1-AS1
FAM22A
ENST00000377171
HIST3H2A
SH3BP4
FN3K
HDHD1
GOLGA6A
PKIG
XAGE-4
CELF4
LOC63930
XLOC_l2_005683
FCRL6
SF3B2
XLOC_010868
XLOC_007944
XLOC_001796
PPY2
SLC22A7
RPL28
VWF
XLOC_005639
CXCL12
CDX4
SCD5
LOC100131129
TM6SF2
C17orf109
XLOC_010979
BC029255
XLOC_012636
XLOC_001186
XLOC_011007
TMPRSS15
ENST00000390379
TMPRSS6
GREB1L
C14orf64
C14orf64
XLOC_002856
ALDH3B1
XLOC_007995
XLOC_004430
FCRL2
XLOC_l2_005916
XLOC_004302
SFTPC
CMKLR1
XLOC_009814
XLOC_006798
PLXNB1
NOP2
FGF17
WNT4
XLOC_007188
OSBPL6
A_33_P3225011
NP103607
THPO
XLOC_l2_007834
KIRREL-IT1
XLOC_009344
XLOC_011564
XLOC_l2_013734
PDE1C
XLOC_l2_000006
EMR1
ZNF467
XLOC_012505
C17orf103
IGF1
XLOC_012953
C6orf138
ECE1
Q93YZ4
PLCH2
HS3ST2
XLOC_005746
XLOC_008763
XLOC_003548
SERPINA3
LOC100507108
XLOC_010466
MRPL38
OR51B2
THPO
DSCR8
GPR148
XLOC_010245
FLCN
ITGA2
LOC100507584
PRDM14
A_33_P3304893
GLI2
XLOC_001469
XLOC_012881
HSD3B2
LOC100131763
MAPK13
ADORA1
XLOC_007146
XLOC_003153
XLOC_l2_009140
ENST00000522186
XLOC_011059
XLOC_000950
XLOC_l2_015336
LOC100506926
SHROOM3
WNT10A
XLOC_014246
LPAL2
RHBG
XLOC_010879
TNIP3
CD177
TNNT2
XLOC_l2_009302
XLOC_013284
PLEKHN1
KALRN
SCML4
DNAH17
AK123300
SYT10
HCN2
CREB3L3
OR4E2
XLOC_007638
TBC1D3B
P4HA3
A_33_P3365057
XLOC_010432
ABCB1
MST1
LOC728254
XLOC_013729
CACNG7
A_33_P3292138
XLOC_005238
LPAL2
GRAMD1A
GALT
XLOC_003474
TTTY15
AK125288
HBA2
BX096650
XLOC_001224
A_33_P3253179
GCNT4
LOC286467
THC2524341
PLEKHF1
XLOC_009935
A_33_P3412795
LOC100128262
SPEF1
TBC1D26
XLOC_013054
INSC
XLOC_000951
CDX4
MCF2L
C15orf40
C1orf210
XLOC_004669
SYTL3
XLOC_008254
VNN2
C22orf24
SNAR-B1
THC2750069
HDGFRP3
RGN
EFNA1
XLOC_006426
XLOC_013573
LOC100129072
CRIP2
ENST00000390400
A_33_P3407592
LOC388210
XLOC_001460
XLOC_l2_010014
OR9Q1
XLOC_003793
ANO2
ARVCF
PALLD
CLU
NQO2
L3MBTL4
XLOC_011295
FTCD
XLOC_004209
LOC729178
MUC2
XLOC_011726
XLOC_001253
ECHDC3
SYT9
SRG7
TTC16
XLOC_003991
LDB3
MGC4294
XLOC_004492
FAM160A1
THPO
A_33_P3311001
MAFK
NLRP13
OR6K3
LOC390660
XLOC_004060
XLOC_005952
XLOC_l2_013729
XLOC_013966
XLOC_004509
XLOC_l2_011098
XLOC_007681
LOC100505533
XLOC_008609
TRPC4
CDRT15
SLC22A9
CLIC5
NAMA
XLOC_010562
ARHGAP5
LOC100506190
LAG3
XLOC_004429
VWF
TNC
ARHGAP10
ENST00000495094
XLOC_007647
LOC100132850
LOC100289473
LOC100287010
XLOC_002881
ENST00000425181
LCE3E
LOC149684
IL21
XLOC_009578
VNN2
XLOC_l2_000522
MFSD2B
P4HTM
GGT7
XLOC_012833
XLOC_003755
A_33_P3336018
XLOC_l2_007112
LINC00338
XLOC_007020
ENST00000505736
LOC100130348
SMCR7
OR8B12
XLOC_l2_008888
CROCC
INO80
XLOC_000035
MIRLET7BHG
TRPV6
AKAP12
XLOC_009926
AI198876
XLOC_l2_007112
XLOC_010664
LPA
DDB2
LOC400541
CES3
LOC100653051
XLOC_l2_003843
HUNK
LGALS17A
A_33_P3347663
ALG1L2
USHBP1
AK097103
DRD5
RAB34
XLOC_002622
EXOC3L2
XLOC_011276
XLOC_004464
XLOC_004290
MIR143HG
XLOC_l2_000033
NANOGNB
AQP1
PLCXD2
A_33_P3291772
XLOC_l2_005892
CSHL1
AB363267
LOC100127946
PPP1R18
LINC00310
XLOC_005171
VNN2
PET112
XLOC_002411
XLOC_000083
A_33_P3275065
LOC143666
XLOC_003970
LOC100509205
NOL12
MICALL1
BIRC7
RBMY3AP
PXN
XPO5
P39194
IGF1
XLOC_l2_012791
HECW2
XLOC_011281
XLOC_004277
XLOC_007393
TBL3
VWF
ADAMTSL2
XLOC_012965
XLOC_002878
ANKRD33B
TMEM125
LOC100652854
SLC35F4
CNTD1
VWF
UGCG
SEMA6C
VWF
STMN1
CROCCP2
XLOC_l2_011924
XLOC_l2_009736
MINK1
LOC100500938
C11orf21
ZDHHC18
CD675678
XLOC_012894
XLOC_002916
F10
XLOC_008791
CHRM5
XLOC_008029
STK38
XLOC_000781
AFAP1L1
NRCAM
NYNRIN
FLOT1
NRXN3
LOC100508383
PVRL1
XLOC_013596
ENST00000536864
LOC100130197
OVOS2
BARHL2
XLOC_000379
BE782190
ANAPC1
LOC729164
PPM1F
LOC100128682
LOC100130051
NFKBIB
PROM2
XLOC_003578
XLOC_007243
SEMA3G
A_33_P3238325
SLC2A8
MAST3
KLHL22
PRSS16
LINC00371
XLOC_000031
LOC643355
METTL22
EXD3
RHOV
TAPBPL
LOC283174
LOC100130547
XLOC_014172
XLOC_001789
TNIP2
XLOC_007658
WNT2B
EYA4
CYP2D6
GCNT4
IGSF8
GRIPAP1
TMEM184A
PITPNM1
NRIP3
SLC37A1
ETV4
XLOC_009191
A_33_P3278191
MYCNOS
A_24_P92163
SARDH
SLC9A10
XLOC_l2_006595
SLC25A47
ABCC5
COL1A2
CHRND
XLOC_007003
IFNA8
XLOC_l2_009929
XLOC_001258
VPS39
DKK3
PRDM14
PDE3A
TMED3
A_33_P3290149
UPF3A
XLOC_l2_011873
CFI
LOC100507165
FAM71F1
XLOC_002224
URGCP
RAB3C
HS2ST1
LOC151475
NGRN
DYNLRB2
CAP1
PPFIA1
ATG13
DDX39B
LOC401320
PRDM15
F8A1
MAML1
CHAF1A
LUZP1
CCDC103
UBE3C
GUF1
RLIM
CHMP1A
AK094155
AKAP8L
PRPF8
SKI
HEATR2
C1orf86
CLIC4
TYW1B
RPS6KA1
TIRAP
SPTAN1
SEC16A
XLOC_l2_000654
MPPE1
XLOC_l2_006609
TRAP1
EEF1A1
RBM23
CCRN4L
TUG1
RNF217
PI4KA
AAMP
SNORD67
TAPBP
XLOC_l2_013116
PI4KAP2
FHOD1
2009-09-01
XLOC_012020
SPATS2
FAM193A
DDX52
WBSCR16
FAM193A
THOC6
GRHPR
SPATA13
BACE1
RASSF5
PTTG1IP
ZNF720
CHST10
HMGB4
ESRRA
IL6ST
WASH1
PRKCD
XLOC_002702
SNORD59A
PTPRC
ABHD11
ZSCAN21
TRIM14
XLOC_l2_005179
TYK2
NEAT1
VTI1A
WDR1
ENST00000442128
DNM2
ENST00000535190
SUZ12P
GUSBP11
THC2686826
ADAM15
NAPA
KIAA1432
FAM134A
SMAD7
PLOD3
NAAA
SCAMP2
ZBTB26
COMT
ZFP64
SLC25A39
INTS4
PBX2
MALAT1
APOL6
CDC37
LOC100506866
LOC100290566
AGPAT4
CHAC1
LOC100132247
NCKAP1L
POTED
LRRC4B
ATP6AP2
NPLOC4
LOC100506342
MAML1
ENO1
CTSC
NEAT1
CES1
XLOC_002997
GYG1
PPP3R1
GCH1
CR997556
ATP8
XLOC_003405
C19orf38
CAPN10
AKIRIN1
XLOC_l2_015744
ARPC5L
IL6R
PIGS
ATXN2L
NKIRAS2
GSTM1
ZSWIM1
XLOC_014358
XLOC_l2_008409
MLST8
VPS11
ZC3H11A
TAX1BP3
FN3KRP
GNAS
A_33_P3274763
SHISA5
ATP1A1
SNRNP70
CCDC88B
EEF1A1
AKAP1
MGRN1
AFG3L2
THC2725851
VPRBP
PCCB
KIF4A
ACAD9
INTS4
INTS4
NUP93
SNORA63
XLOC_l2_013808
AP3D1
C22orf37
PLOD1
SMG1
DDX11
CCDC88B
NCOA2
FCHSD2
CACNA1S
RPSA
XLOC_000647
CTRC
JUND
ZNF621
SLC35E3
VEZT
GPR179
HIATL1
TRAF4
TIRAP
LOC645676
ENST00000425161
WDR1
GPAA1
VTI1A
F8A1
MBD1
F8A1
SRSF6
LOC731275
RGS12
NT5C3
F8A1
RASA4
F8A1
WDR90
PRKCD
XLOC_007508
C22orf13
GUSBP1
USF1
C10orf71
ZNF468
C15orf57
EDC4
ZNF618
CD40
ZBTB11
SNX21
XLOC_000153
2009-09-01
NOMO1
NOTCH2
DDB1
SKIL
TRAK1
PDXDC2P
XAB2
LOC493754
MEG3
2009-09-01
SECISBP2
GEN1
HDGF
BACE1
XLOC_l2_015892
GOLGA3
CAMK2D
ETV3
ARGLU1
LOC574538
F8A1
PTTG1IP
PIK3R5
RNF213
PSEN1
MAML1
CFL1
TOMM40
MCM2
MARK4
APTX
FTSJ2
SOD2
TRAPPC10
LOC100653296
PGD
ENST00000354995
TRIP12
C2orf29
PSMD1
SCMH1
SNORD3B-1
LOC399744
EVI5L
OXA1L
MAP4
GNB2L1
DNAJB5
IRAK1
NP106769
STAG3L2
XPO6
FAM193A
IRF1
SYNGR2
[truncated: 4,472 more rows]

## Sheet: Table S2
Table S2: Gene ontologies enriched in 4 h free GSNO- exposed cells transcriptome (Cluster 8)
Category	Gene ontology (GO)	GO ID	Total	Changed	%	P-value	FDR (Changed)	Enrichment
immune response	cytokine-mediated signaling pathway	19221	344	106	30.814	0	0,0011	1.54784
	antigen processing and presentation of exogenous antigen	19884	173	59	34.104	0	0,0015	1.7131
	antigen processing and presentation	19882	198	65	32.8283	0	0,0019	1.64902
	antigen processing and presentation of exogenous peptide antigen	2478	171	57	33.3333	0	0,0021	1.67439
	antigen processing and presentation of peptide antigen	48002	184	61	33.1522	0	0,0024	1.66529
	cellular response to interferon-gamma	71346	103	36	34.9515	0.0002	0,0072	1.75567
	regulation of cytokine-mediated signaling pathway	1959	77	29	37.6623	0.0002	0,0074	1.89184
	lymphocyte proliferation	46651	206	62	30.0971	0.0003	0,0074	1.51183
	response to interferon-gamma	34341	124	41	33.0645	0.0004	0,0125	1.66089
	regulation of response to cytokine stimulus	60759	83	30	36.1446	0.0004	0,0126	1.8156
	regulation of type I interferon production	32479	104	35	33.6538	0.0007	0,0149	1.69049
	type I interferon production	32606	106	35	33.0189	0,001	0,0194	1.65859
	interferon-gamma-mediated signaling pathway	60333	72	26	36.1111	0,001	0,0195	1.81392
	antigen processing and presentation of exogenous peptide antigen via MHC class II	19886	95	32	33.6842	0,0011	0,0195	1.69201
	antigen processing and presentation of peptide or polysaccharide antigen via MHC class II	2504	99	33	33.3333	0,0011	0,0199	1.67439
	negative regulation of cytokine-mediated signaling pathway	1960	24	12	50	0.0009	0,02	2.51158
	regulation of type I interferon-mediated signaling pathway	60338	34	15	44.1176	0,0012	0,0202	2.2161
	regulation of leukocyte mediated immunity	2703	111	36	32.4324	0,0012	0,0227	1.62913
	antigen processing and presentation of peptide antigen via MHC class I	2474	97	32	32.9897	0,0016	0,0352	1.65713
	Fc receptor mediated stimulatory signaling pathway	2431	75	26	34.6667	0,002	0,0373	1.74136
	antigen processing and presentation of peptide antigen via MHC class II	2495	98	32	32.6531	0,002	0,0374	1.64022
	regulation of type 2 immune response	2828	23	11	47.8261	0,0024	0,039	2.40238
	positive regulation of immune effector process	2699	111	35	31.5315	0,0024	0,039	1.58388
	response to type I interferon	34340	73	25	34.2466	0,0029	0,043	1.72026
	regulation of myeloid leukocyte mediated immunity	2886	27	12	44.4444	0,0033	0,0463	2.23252
	Fc-gamma receptor signaling pathway involved in phagocytosis	38096	70	24	34.2857	0,0034	0,0463	1.72223
metabolic process	coenzyme metabolic process	6732	231	70	30.303	0.0001	0,0058	1.52217
	protein polyubiquitination	209	176	55	31.25	0.0002	0,0072	1.56974
	positive regulation of NF-kappaB transcription factor activity	51092	115	37	32.1739	0,0012	0,0226	1.61615
	negative regulation of ligase activity	51352	74	26	35.1351	0,0016	0,0357	1.7649
	negative regulation of ubiquitin-protein ligase activity	51444	74	26	35.1351	0,0016	0,0357	1.7649
	pteridine-containing compound metabolic process	42558	32	14	43.75	0,0018	0,0365	2.19764
	regulation of nuclease activity	32069	72	25	34.7222	0,0023	0,037	1.74415
	regulation of ubiquitin-protein ligase activity	51438	103	33	32.0388	0,0024	0,0386	1.60936
	positive regulation of nuclease activity	32075	65	23	35.3846	0,0026	0,0414	1.77743
	folic acid-containing compound metabolic process	6760	27	12	44.4444	0,0033	0,0463	2.23252
	superoxide metabolic process	6801	44	17	38.6364	0,0032	0,0466	1.94077
cell differentation	T cell proliferation	42098	146	49	33.5616	0.0001	0,004	1.68586
	positive regulation of lymphocyte differentiation	45621	69	26	37.6812	0.0005	0,0131	1.89279
	positive regulation of B cell differentiation	45579	12	8	66.6667	0.0006	0,0137	3.34878
	gamma-delta T cell differentiation	42492	8	6	75	0,0012	0,0215	3.76737
	positive regulation of B cell activation	50871	62	23	37.0968	0,0012	0,0226	1.86343
	positive regulation of leukocyte differentiation	1902107	111	36	32.4324	0,0012	0,0227	1.62913
	regulation of lymphocyte differentiation	45619	114	36	31.5789	0,0021	0,0372	1.58626
	regulation of B cell differentiation	45577	23	11	47.8261	0,0024	0,039	2.40238
	positive regulation of natural killer cell differentiation	32825	9	6	66.6667	0,003	0,0459	3.34878
RNA transport	RNA export from nucleus	6405	93	35	37.6344	0.0001	0,0028	1.89044
	RNA transport	50658	111	40	36.036	0.0001	0,0029	1.81015
	establishment of RNA localization	51236	111	40	36.036	0.0001	0,0029	1.81015
	nucleic acid transport	50657	112	40	35.7143	0.0001	0,004	1.79399
	mRNA export from nucleus	6406	76	29	38.1579	0.0002	0,0062	1.91673
	mRNA transport	51028	81	30	37.037	0.0003	0,0072	1.86043
ATPase activity	ATPase activity, coupled to transmembrane movement of substances	42626	101	37	36.6337	0.0001	0,004	1.84017
	ATPase activity, coupled to movement of substances	43492	105	37	35.2381	0.0002	0,0063	1.77007
	ATPase activity, coupled to transmembrane movement of ions	42625	54	22	40.7407	0.0004	0,0106	2.04648
	cation-transporting ATPase activity	19829	49	20	40.8163	0.0006	0,0149	2.05027
	ATPase activity, coupled to transmembrane movement of ions, phosphorylative mechanism	15662	39	16	41.0256	0,002	0,0368	2.06079
apoptosis	positive regulation of intrinsic apoptotic signaling pathway	2001244	39	21	53.8462	0	0.0009	2.70478
	MDM2/MDM4 family protein binding	97371	6	6	100	0.0001	0,0042	5.02317
	regulation of intrinsic apoptotic signaling pathway	2001242	96	32	33.3333	0,0013	0,0233	1.67439
	regulation of apoptotic signaling pathway	2001235	118	37	31.3559	0.0021	0,0372	1.57506
vacuole	vacuole fusion, non-autophagic	42144	12	8	66.6667	0.0006	0,0137	3.34878
	fungal-type vacuole	324	30	13	43.3333	0,003	0,0438	2.17671
	secondary lysosome	5767	9	6	66.6667	0,003	0,0459	3.34878
	vacuole organization	7033	89	29	32.5843	0,0032	0,0462	1.63676
transport	hydrolase activity, acting on acid anhydrides, catalyzing transmembrane movement of substances	16820	101	37	36.6337	0.0001	0,004	1.84017
	P-P-bond-hydrolysis-driven transmembrane transporter activity	15405	103	37	35.9223	0.0001	0,0054	1.80444
	primary active transmembrane transporter activity	15399	103	37	35.9223	0.0001	0,0054	1.80444
	protein export from nucleus	6611	51	20	39.2157	0,0012	0,0202	1.96987
cellular homeostasis	regulation of cellular pH	30641	47	19	40.4255	0,001	0,0197	2.03064
	regulation of intracellular pH	51453	44	18	40.9091	0,0011	0,0198	2.05493
	cellular monovalent inorganic cation homeostasis	30004	57	21	36.8421	0,0022	0,0373	1.85064
cellular response to stimulus	cellular response to reactive oxygen species	34614	101	34	33.6634	0.0008	0,0166	1.69097
	hyperosmotic response	6972	37	16	43.2432	0,001	0,0194	2.17218
	positive regulation of I-kappaB kinase/NF-kappaB cascade	43123	143	44	30.7692	0,0013	0,023	1.54559
translation	regulation of translation	6417	204	61	29.902	0.0004	0,0123	1.50203
	translation factor activity, nucleic acid binding	8135	73	25	34.2466	0,0029	0,043	1.72026
	flavin adenine dinucleotide binding	50660	48	21	43.75	0.0001	0,0063	2.19764
	cellular pigmentation	33059	45	20	44.4444	0.0002	0,0064	2.23252
	platelet activation	30168	220	66	30	0.0002	0,0068	1.50695
	membrane fusion	61025	125	40	32	0.0009	0,0196	1.60741
	U4/U6 x U5 tri-snRNP complex	46540	16	9	56.25	0,0014	0,0252	2.82553
	activation of signaling protein activity involved in unfolded protein response	6987	63	23	36.5079	0,0016	0,0354	1.83385
	body morphogenesis	10171	60	22	36.6667	0,0019	0,0361	1.84183
	extracellular matrix assembly	85029	14	8	57.1429	0,0023	0,0386	2.87038
	ribonucleoprotein complex binding	43021	74	25	33.7838	0,0035	0,0463	1.69702

## Sheet: Table S3
Table S3: Full list of genes of Cluster 7 which is activated after exposure to GNP for 4 h.
5471 genes
XLOC_l2_004950
TEX10
XLOC_013486
FAM87A
ZNF114
FAM24B
KLF6
NT5DC3
IL22
XLOC_005316
XLOC_004501
PDGFA
RASL11B
TP53RK
LOC100653007
BCAP31
INSL4
CASP8
THC2558186
USP42
A_24_P710999
FRMD3
XLOC_l2_015893
EDAR
P39188
XLOC_001129
ZNF160
NOB1
APOA2
AK123491
THC2491122
XLOC_010525
LHX9
KLF6
SNORD92
MCOLN3
ST6GAL1
TEX10
THC2520792
FOXJ3
XLOC_001362
FLJ31306
ZYG11A
HIST1H3C
GGA1
GOLGA6L5
TEX10
MED20
THC2639225
XLOC_l2_002502
LOC100130849
XLOC_000918
LOC100288842
XLOC_005489
ALG1L2
DCTN6
XLOC_008346
PAR5
XLOC_004161
VPS37A
XLOC_008408
NXN
HIPK4
CPNE2
BC126309
FLJ35424
TREML2
XLOC_011866
XLOC_l2_003674
XLOC_009734
RAB43P1
XLOC_l2_014585
XLOC_l2_011728
XLOC_000566
PCDHB1
XLOC_003169
PALLD
LHCGR
XLOC_l2_011302
THC2603382
TPK1
KRTAP21-3
IL15RA
TM4SF19
PHLDA2
HLA-A
HLA-A
FKBP15
THC2532340
DTX4
ATP6V1H
XLOC_012248
ZNF735
HIST3H3
ZNF320
PRAMEF15
XLOC_001882
BRSK2
P2RY4
SMG1
LOC100130345
TTC36
XLOC_002919
XLOC_l2_012925
CCZ1
HAO1
LOC100287632
UBQLN3
MME
LOC389033
PSG10P
THAP5
XLOC_l2_014821
XLOC_l2_010239
LRRC15
ZNF160
LOC145757
XLOC_013310
LRRC59
A_24_P786713
LOC730101
XLOC_011224
XLOC_012034
XLOC_006409
XLOC_l2_010724
RAPGEF3
LOC386597
SLC26A3
XLOC_008668
SCNN1D
LYL1
ENST00000454167
DGKB
XLOC_005965
OCLM
LOC727799
2002-03-01
FAM160A2
KLK11
NKRF
ENST00000446840
TEC
GPR125
LOC100287415
XLOC_010556
KIR3DL1
ARL8A
XLOC_006445
XLOC_l2_007033
GGTA1P
CSN1S1
LOC100129408
XLOC_009122
LOC728671
XLOC_000144
XLOC_007895
NGEF
SSX3
MGAT4C
XLOC_l2_015373
XLOC_l2_008214
SSX3
XLOC_l2_011854
XLOC_004135
XLOC_002108
ZNF233
PRSS44
XLOC_009826
CDH1
CDH13
SULT1C2P1
XLOC_000136
XLOC_010752
AK094885
XLOC_000447
BAIAP2L2
TCF23
ZFP92
GBAS
FLJ30838
LOC100128977
FAM205B
CTSE
XLOC_002909
SPRYD7
LOC100507759
XLOC_001428
LOC100289079
KLF8
ABCG1
XLOC_002063
LOC100506393
NP511337
XLOC_003671
XLOC_002392
A_33_P3371450
SIGLEC9
XLOC_009252
FAM157A
CXorf41
A_33_P3298935
XLOC_002117
GAGE1
XLOC_l2_010415
LHCGR
SNORD9
OR4K15
XLOC_013947
MOV10L1
XLOC_005523
LOC100130148
LINC00112
FAM110C
NOX4
XLOC_005309
XLOC_000052
ACSM4
XLOC_007464
NDUFA9
LPAR6
HLA-DRB1
HLA-DRB1
LINC00277
XLOC_002289
IL17B
A_33_P3331613
COL13A1
XLOC_013216
SVOP
GRIK1
XLOC_l2_014217
CXorf57
LSMD1
ABCA8
EFR3B
XLOC_010240
XLOC_l2_010097
XLOC_002142
SNCA
PTGDS
PKHD1
ATP1A2
XLOC_002841
A_33_P3318766
FLJ40453
XLOC_004352
TNFRSF6B
XLOC_l2_009979
USP9Y
DIO3
ENST00000407030
SMPX
XLOC_l2_010511
XLOC_000768
ENST00000322220
XLOC_001992
XLOC_001958
DDR1
GHRHR
XLOC_003726
A_23_P90470
FUT1
XLOC_010234
XLOC_003870
PROM2
WHSC2
XLOC_006015
LRRC19
LOC253573
LOC401589
XLOC_000119
XLOC_002476
CCL1
KCNT1
XLOC_005808
XLOC_005915
LENEP
XLOC_014177
SFTPD
XLOC_006210
MRPS26
PEX11G
C17orf100
ZNF474
C12orf12
DPPA2
XIRP2
CYP4B1
LOC729558
XLOC_002356
IRX4
XLOC_000456
ZMAT3
AQP9
HS3ST1
MMP9
CXCR5
WDR20
NP1246718
DPF1
MDH1
KIR3DX1
HLA-DPA1
HLA-DRB1
XLOC_009113
ENST00000433966
AQP5
XLOC_004603
ANKRD24
EIF5AL1
SULT1A2
XLOC_007197
CARD18
GJB5
XLOC_002264
ENST00000390301
ZCCHC3
XLOC_004574
ASB11
A_33_P3323975
ENST00000515150
APCDD1L
C20orf160
XLOC_013370
LOC284578
XLOC_009792
XLOC_005111
C2orf67
FAM104B
XLOC_004942
LOC643441
XLOC_007954
XLOC_014251
XM_003118668
VAPB
ANKRD63
A_33_P3271038
IFNG
LOC441601
XLOC_000980
XM_002343033
XLOC_l2_002171
XLOC_000222
XLOC_l2_010226
XLOC_010541
Q6ILE4
LOC157273
LOC389831
XLOC_009714
OOSP1
XLOC_003907
CASQ1
XLOC_l2_012323
TTTY23
XLOC_008058
XLOC_001541
XLOC_010706
XLOC_001743
BARX2
XLOC_007540
LOC100505820
DKFZp686L13185
XLOC_006804
LOC100507431
XLOC_002685
FSHR
LINC00238
PPIL6
THC2772049
BC012881
XLOC_002647
KATNB1
FAM129C
RNASE1
AQP8
EBNA1BP2
XLOC_014086
NRIP2
KRT31
AF130091
XLOC_000421
XLOC_004885
DHRS7
ZCCHC6
XLOC_009080
XLOC_000731
PXDNL
SLC17A1
RXFP2
GABRB2
JAKMIP1
DDR2
XLOC_l2_013390
SPEF2
XLOC_l2_013857
LOC100130865
XLOC_011174
ENST00000398112
TAC1
XLOC_007150
XLOC_007573
ROBO2
XLOC_004278
MATN3
SPANXB2
VPS13D
XLOC_011305
THC2568076
XLOC_011117
XLOC_l2_013621
GPR34
XLOC_008636
XLOC_007254
ZCCHC13
XLOC_002859
XLOC_005461
GCNT4
A_33_P3296696
XLOC_013583
XLOC_013268
ARID5A
BC009492
CPXM1
XLOC_003016
CEACAM4
KIAA1704
RXFP2
RNF6
XLOC_l2_010448
XLOC_008372
EPG5
CYP4X1
LOC100127994
ENST00000390396
EGR2
MSR1
XLOC_001676
XLOC_l2_008203
SLC2A4
OVOL1
XLOC_014247
XLOC_l2_007785
JUN
XLOC_002694
NR0B1
KRTAP4-1
A_33_P3226675
CXCR6
GNGT1
XLOC_003400
HCG18
GRID2IP
DB066855
CINP
XLOC_002049
XLOC_011686
NACC2
PRKACB
XLOC_l2_005705
JPH4
ZNF571
XLOC_010556
TWIST2
AK128215
P2RY2
SNORD53
PCDH8
ASB1
SACS
KLF9
NACC2
ZEB2
RNF126
FSD1L
ESR1
LOC441025
XLOC_009815
THC2725860
SERPINA11
ANGPT1
KRT23
XLOC_011447
PLEKHH2
LOC100653233
LOC100505825
XLOC_003508
XLOC_006001
ZIC1
XLOC_000246
XLOC_002840
XLOC_003475
AK127153
THC2703660
XLOC_000849
ESR1
MGC34034
XLOC_009858
PCDHB18
C21orf91-OT1
XLOC_000852
LOC347411
XLOC_l2_012911
PAX2
LINC00284
XLOC_l2_013967
XLOC_010683
XLOC_013734
SLC18A1
XLOC_007814
XLOC_004321
TEK
XLOC_008482
LOC100505474
XLOC_l2_013277
XLOC_008645
HSPB7
OR7D2
TMEM231
XLOC_008299
CCL2
TM4SF19
MMP12
SLC20A2
SGSM1
HLA-A
A_33_P3378318
LOC100505836
C20orf24
CD36
IL6
FLJ43663
MTHFS
ATF3
ACOX2
XLOC_004924
CCL2
HLA-A
A_33_P3253857
RHOB
PVR
VMA21
HRASLS5
FHL2
HECTD2
XLOC_007930
XLOC_002808
FAM155A
DNAJC6
XLOC_l2_000423
XLOC_l2_012154
ENST00000390285
XLOC_l2_015315
XLOC_l2_014585
XLOC_006944
XLOC_011157
PCDHA5
SUFU
AL833436
TCF7L2
XLOC_001815
CCDC166
THC2616877
GALNT9
CSN1S1
LOC400680
LOC100289255
ENST00000515542
LOC100506380
LOC731932
XLOC_010784
KRTAP19-5
ITGA7
ANKRD11
AARSD1
XLOC_011753
A_33_P3324680
XLOC_011170
XLOC_008604
XLOC_013647
XLOC_003235
CNTNAP3B
LANCL2
IQSEC3
XLOC_008188
C8orf68
LOC100128979
XLOC_004441
PDZRN3
FAM133B
FLJ43663
TNFSF8
WEE1
XLOC_003780
XLOC_001281
XLOC_000982
XLOC_005567
HMGA2
GCM2
LOC100507630
XLOC_012625
SERTM1
ABCB1
LOC339539
XLOC_l2_015716
XLOC_006689
XLOC_008116
XLOC_002078
LOC100287506
MANSC4
XLOC_013541
FAAH2
XLOC_010284
XLOC_009249
LOC151657
XLOC_006983
XLOC_009628
SLC24A4
XLOC_005260
DKK4
XLOC_010915
ENST00000390315
EPHA4
XLOC_l2_001760
XLOC_004907
A_33_P3218531
XLOC_009167
XLOC_001657
FAM92B
XM_001714359
SNAR-G1
C6orf145
XLOC_l2_001549
XLOC_014192
XLOC_008867
RFPL3
ENST00000335507
HIP1R
XLOC_006606
AGSK1
KIF19
XLOC_000386
XLOC_003494
A_33_P3421438
S1PR1
XLOC_007451
MIA2
FAAH2
XLOC_005881
XLOC_001720
LOC553137
ANKRD39
DYRK1A
WDR66
LOC100129675
AK122666
C1orf95
XLOC_l2_009448
XLOC_000224
A_33_P3209185
LRRTM3
MGP
A_33_P3389028
XLOC_006743
XLOC_004325
S1PR4
PLA2G12B
XLOC_011865
ENST00000361201
A_33_P3214750
SEMG2
TRPC4
XLOC_005787
XLOC_011891
HBB
AOX2P
AK7
NGEF
GOT1L1
ZNF528
FAHD1
TSNARE1
MBL2
FZD5
LRIG3
PPBP
XLOC_002499
GUCY1A3
SH3BGRL3
PPARGC1B
C11orf36
A_33_P3418466
GTF2H1
ARID3C
FLJ10661
FAM25A
WDR53
XLOC_l2_001011
XLOC_003734
C9orf91
ODF3B
SCN9A
XLOC_007545
XLOC_003697
FRMPD4
AK091409
ALG5
XLOC_004263
LINC00442
LOC100499183
DYNC2LI1
ENST00000390628
ENST00000431307
XLOC_012870
XLOC_l2_000894
PSORS1C3
AB529254
XLOC_003840
RBM20
SLC9A4
XLOC_005524
HS3ST2
AKAP4
XLOC_l2_010885
OR51B2
XLOC_004266
LOC100132005
WDFY3-AS2
LIMS3-LOC440895
REXO1L1
GRIK1
C22orf31
SLC24A2
XLOC_l2_013428
LINC00246A
MAGEB1
XLOC_008360
TM4SF20
ENST00000533625
IGSF10
LOC283404
XLOC_006008
XLOC_001051
XLOC_007148
XLOC_012043
FAT4
VSX1
DBH
HSPB3
C20orf203
DKFZp686K1684
CXCL13
XLOC_011730
LOC729706
OR4X1
XLOC_007342
FLJ43663
FGF6
GALNT13
RAX
XLOC_011882
XLOC_004758
MARVELD3
XLOC_001117
XLOC_001504
THC2733494
A_33_P3329123
TMOD1
MMEL1
ENST00000441991
XLOC_000181
COL13A1
XLOC_002079
XLOC_003911
XLOC_l2_009884
TEX10
XLOC_005637
OR52D1
F2RL2
LOC100505545
RXFP2
XLOC_004291
VNN1
HOXC12
LOC339505
IFNA16
LOC286467
LOC100506178
XLOC_l2_010687
OXSM
XLOC_l2_000738
XIST
EDAR
XLOC_001195
SULF1
C5orf52
XLOC_000917
XLOC_001317
FAM101A
ZNF285
FLJ45983
FER1L6
SNX22
ENST00000325778
KRTAP4-1
OSCP1
XLOC_013026
OR52B6
XLOC_009323
XLOC_007488
A_33_P3393617
XLOC_010632
LOC100144602
XLOC_011826
XLOC_007867
A_33_P3217507
MUC19
XLOC_007581
CRYAA
Q8YNJ1
LINC00290
XLOC_006247
XLOC_012866
FLJ12334
XLOC_l2_005690
XLOC_001734
XLOC_008840
OR51B2
LOC645355
AGTR2
FTLP10
Q9BVX4
XLOC_003735
XLOC_005596
BX097352
GPM6A
XLOC_006991
XLOC_004285
ENST00000411514
XLOC_003250
XLOC_011926
XLOC_000669
AGTR2
FLT4
XLOC_004850
XLOC_008198
XLOC_l2_010650
FGFR3
SLC13A3
REG1P
ENST00000390435
CRYBB3
XLOC_l2_013193
CCDC63
ENST00000443479
CARD11
XLOC_013872
OR1B1
C20orf123
SFRP5
LOC100130849
LOC100652797
LOC100130370
XLOC_012444
LOC100507127
XLOC_004765
A_33_P3744376
XLOC_005304
XLOC_003926
GATA1
HRASLS2
A_19_P00803499
LOC100505659
FLJ41941
XLOC_003465
XLOC_011918
LOC100506069
MEG3
LINC00261
A_33_P3295071
LOC100506629
OR2AK2
XLOC_002673
XLOC_004205
LOC100131821
SLC25A18
C21orf128
XLOC_004375
GPR34
XLOC_013551
A_33_P3276381
XLOC_008430
ACTL7A
PRO1768
XLOC_000935
MAGEE2
OR52M1
SP2
XLOC_008729
A_33_P3323892
GFRAL
ZNF704
XLOC_l2_008755
A_33_P3329552
ENST00000492731
XLOC_004517
LOC100289511
CADPS
A_33_P3370612
MYL4
MTRR
XLOC_l2_003897
TUBAL3
MYO3A
AATK-AS1
PAX6
XLOC_l2_008405
XLOC_004325
XLOC_004471
XLOC_l2_007186
CXCL13
XLOC_003358
XLOC_006291
SERPINB12
LOC100507539
RGN
XLOC_l2_002271
MGC39372
XLOC_l2_004537
XLOC_000117
ARHGEF26-AS1
LINC00277
IL36A
FAM187B
LAYN
SYNPO2L
XLOC_010971
XLOC_009849
PRMT8
XLOC_000609
OR52L1
HES1
HS3ST2
LOC389676
CYP3A7
RHPN2
A_33_P3345299
INSL4
FAM74A3
LOC100507164
BG204542
HSD52
HBB
CPS1-IT1
XLOC_l2_001583
LOC339788
XLOC_005153
SNAP91
XLOC_003547
CTLA4
XLOC_l2_006621
RNF207
HFE
LOC100129476
ASTL
A_33_P3401068
REXO1L1
XLOC_000036
LOC100130857
ANKRD20A9P
VSTM4
XLOC_006939
MYH2
GPR133
XLOC_013889
OR52H1
XLOC_l2_013734
CASP14L
CTSL3
LOC100505508
XLOC_003204
EPHA4
XLOC_009085
XLOC_l2_009979
XLOC_001365
XLOC_008357
TMPRSS11E
F7
XLOC_008826
XLOC_001507
XLOC_014105
XLOC_l2_005489
DUSP15
OSBPL6
A_33_P3235905
NP511183
SLC16A12
ENST00000541173
LOC283737
XLOC_000454
XLOC_007772
XLOC_000198
THC2688742
XLOC_003321
CDHR3
ENST00000390466
ENST00000455707
LOC154822
XLOC_013038
LAMA1
XLOC_012114
LOC100506599
XLOC_l2_012745
XLOC_001588
XLOC_012307
LOC100287792
LOC100652950
RELN
TSPAN7
XLOC_l2_011255
NTS
ESRRB
FAM55D
XLOC_002010
XLOC_010929
XLOC_012530
XLOC_l2_013080
ENST00000422603
C9orf96
A_19_P00804924
DMP1
XLOC_002771
GNGT1
GATA5
TNNC1
WNT10A
BBS1
GDAP1L1
DOC2B
XLOC_l2_011043
XLOC_013445
PRDM14
CCDC108
MEGF11
IL22RA1
NAG20
XLOC_000640
ZIC1
FUT1
XLOC_l2_007586
CXCR6
Q2I700
SP140
XLOC_l2_011350
KREMEN1
A_33_P3212360
XLOC_007266
POF1B
XLOC_002019
TTTY6
XLOC_003615
XLOC_005461
LOC100652883
LYPD4
XLOC_004374
EPAG
A_33_P3266195
C11orf41
TXNRD2
XLOC_002010
WSCD2
FAM189A1
FLJ38576
XLOC_013350
GALNT14
XLOC_010931
PSG6
LOC283483
FLJ42875
GPR61
IGF1
XLOC_000675
ANKRD20A9P
XLOC_002772
XLOC_014271
XLOC_014099
GRIK3
XLOC_l2_009613
LOC100652824
LOC338963
ENST00000509460
XLOC_002937
XLOC_007507
FNDC1
PRM1
FBN1
XLOC_001971
XLOC_011615
A_33_P3313940
OR5B21
XLOC_004308
A_33_P3211098
XLOC_002496
FLJ37786
LOC283501
LOC100505676
A_33_P3406413
XLOC_l2_012147
LOC387895
OR5AR1
ENST00000553435
XLOC_011374
XLOC_l2_015038
SPZ1
C7orf69
MAST4
RCVRN
XLOC_l2_014686
LOC414300
XLOC_012908
FCN1
XLOC_004590
XLOC_l2_013532
ZNF236
XLOC_l2_011901
A_33_P3220678
XLOC_000844
LOC100132240
OR13G1
ZNF385D
XLOC_004761
CEACAM16
THC2597470
EDAR
KRT23
XLOC_003457
XLOC_l2_010636
FAM176B
XLOC_005036
ENST00000471935
XLOC_003384
ADAMTSL1
LYPD4
PLCE1
XLOC_003061
A_33_P3379215
XLOC_l2_015800
XLOC_008862
DCHS2
XLOC_006723
ENST00000471857
XLOC_006329
DLC1
XLOC_011407
LINC00403
XLOC_012643
A_33_P3410053
TINAG
PRDX4
XLOC_006088
XLOC_011344
Q9B8G3
THC2526513
XLOC_002588
LOC285375
GDNF
FLJ45983
XLOC_003970
XLOC_009908
XLOC_004423
CCRL1
XLOC_013504
XLOC_001315
XLOC_007211
ENST00000504861
XLOC_003484
ENST00000531730
TULP2
ELK1
A_33_P3272952
XLOC_000916
XLOC_011942
XLOC_004067
XLOC_009911
LOC283486
POU2F3
A_33_P3297310
ACSM1
HSD17B3
XLOC_l2_010772
DTX1
LOC284240
ENST00000319509
LOC388210
LOC152586
FLJ44124
LOC100126447
C7orf62
SERPINB12
B4GALNT4
OR6S1
LOC100131089
OR51B2
HABP2
XLOC_013154
XLOC_005041
XLOC_011339
LOC100505702
XLOC_004919
XLOC_010401
VENTX
A_33_P3214782
XKR5
C17orf72
XLOC_002089
LOC643733
GNGT1
LOC146336
XLOC_002022
FAM48B2
DGCR10
XLOC_009890
DCLK1
MAPK15
XLOC_005394
HBB
ZSCAN5D
XLOC_002407
LOC284412
NXPH3
CPLX4
XLOC_012677
GM140
TRPC7
ACSM1
XLOC_010540
LRRC3
XLOC_004198
A_33_P3254267
XLOC_001331
TRIM48
XLOC_006525
VWA1
XLOC_010486
CSF1
XLOC_005913
XLOC_001765
XLOC_011780
KLK13
OR1G1
LRRC55
XLOC_005827
C4BPB
XLOC_009399
CXCL13
OR51B2
LOC100506190
LOC147670
PRAME
C15orf63
GRK1
CYTL1
XLOC_005167
XLOC_006999
SERPINA1
INHBA
HS3ST2
LRGUK
LOC100128160
LOC400950
VNN3
C6orf168
LOC100652970
XLOC_001412
XLOC_009480
A_33_P3255070
LOC100128668
XLOC_004734
ENST00000514376
LOC285768
GRIN2B
XLOC_001367
PRR15L
WFDC6
ZNF185
CNGA4
JAKMIP2
XLOC_000256
XLOC_002020
FGF10
XLOC_002109
PRO1768
TMEM86A
XLOC_l2_012187
XLOC_007667
CXCL13
LOC442122
XLOC_003699
ENST00000382225
AMDHD2
KRTAP4-1
C1orf192
XLOC_014145
PCK1
DDAH1
XLOC_011671
XLOC_006200
BTBD18
A_33_P3232742
ENST00000390294
LAMC3
FOXR1
XLOC_l2_013120
LMOD3
XLOC_010732
PRR15L
XLOC_013664
LINC00226
XLOC_009132
XLOC_011181
XLOC_l2_011033
KIF12
ENST00000390282
XLOC_007842
LOC100505535
MYL10
EYS
F2
FLJ46066
C16orf72
HPGDS
MARK1
LOC641365
FSIP2
SPACA7
LOC100506113
XLOC_006335
NEUROD2
UPB1
XLOC_l2_011098
LOC100506974
CCDC158
LOC388210
PRO1768
LOC641365
C1orf65
XLOC_012042
BX103560
MIR7-3HG
XLOC_007064
XLOC_009196
XLOC_012888
ENST00000426402
CDR1
LOC100506343
DQ656067
PHF21B
XLOC_001285
XLOC_004120
GPR157
BPESC1
PRO1768
A_33_P3391542
ZNF804B
CFHR3
XLOC_l2_011805
PPEF1
XLOC_004787
XLOC_001635
A_33_P3297280
XLOC_l2_008088
WRAP53
C14orf64
XLOC_007960
F11
ABCC12
LOC100144604
LOC100506412
NDN
LOC100128035
DIRC3
XLOC_l2_005168
XLOC_003561
XLOC_004073
HMGB4
XLOC_002606
LOC100505844
AK090448
LOC440031
COL13A1
XLOC_010257
PAR4
LOC100130256
COL12A1
CCDC62
SERPINB12
OR5AN1
ATCAY
PPP1R9A
ARMC3
XLOC_006133
XLOC_l2_003792
SORBS2
KCNN3
XLOC_005359
SCG2
ENST00000400371
NKX3-1
RCVRN
GLRA3
XLOC_005547
XLOC_003263
LOC116437
A_33_P3279388
XLOC_004954
TMEM87A
XLOC_002021
XLOC_004851
XLOC_013046
PHYHIP
LOC339807
LRRN4
XLOC_l2_009539
XLOC_006903
OR6C1
KIAA1751
XLOC_008700
ENST00000377652
SNORA70G
TMEM33
TUSC1
TRIM27
FUT2
FLJ10661
C11orf95
RNF4
TBX2
BC000817
XLOC_004267
DQ786249
B4GALT4
A_33_P3372084
XLOC_l2_000217
NOP16
DHRS7
GSG1
XLOC_l2_015578
FLJ40606
CHD6
GAD1
EGR4
A_24_P67552
XLOC_l2_001399
NOB1
ZNF699
SFSWAP
XLOC_l2_006651
ENST00000390247
PFN3
PLEKHG2
PLAU
C1orf204
NOB1
PARVB
XLOC_012116
MMP16
SPESP1
LOC728175
A_33_P3397081
RHOB
XLOC_007917
BTG4
PLAU
XLOC_007808
XLOC_l2_007449
CLDN12
MYNN
XLOC_008382
LOC100652916
AK128239
UBE2D3
CWH43
XLOC_l2_003885
ZDHHC11B
CCNH
LOC100506022
ADCY10
C12orf50
XLOC_009437
XLOC_003884
XLOC_003854
XLOC_l2_015336
XLOC_003786
HEATR7B2
XLOC_009981
NEU4
CHMP3
ENST00000482404
KIF3A
GPX6
LOC100287559
XLOC_008276
SBDS
CYP19A1
AEN
TLR6
USP16
PLAU
FOSL1
PIM3
PLAU
SLED1
C7orf40
MTHFD1L
SLC35D2
UBIAD1
XLOC_005110
A_24_P33552
TFB2M
GPATCH8
PTGER4
EEF1G
AMDHD2
DOLK
YY1AP1
POLR2K
SLC36A1
TSC22D4
MPP3
BAG4
FAHD1
PSMC1
CCDC107
FAM100A
TIMM13
SH3BGRL3
CPXM1
MYL3
TNFSF11
AARSD1
CR595167
RPL11
SRA1
HIVEP3
A_33_P3305467
UBXN10
XLOC_l2_013506
RNF7
UBIAD1
XLOC_000826
LTV1
KIAA0196
LOC155060
ARL8B
SERTAD2
METTL1
LOC100507006
FLJ42709
ATXN1
KIAA1467
LRFN4
DOT1L
XLOC_004166
DHRS7
NEAT1
MRAP
LOC149837
FHL2
HLA-DRB1
GCSH
UBE2Q1
SNORD4A
RRN3P2
LOC100287482
TSPY3
DNAJB12
KTI12
SLC7A11
QSOX1
A_24_P49597
LOC389043
LONRF3
C6orf58
CRYGN
A_33_P3221888
XLOC_013683
ABL2
FOLH1
ZPBP
LOC643837
XLOC_008466
GMPS
CAB39L
LOC100128371
ENST00000471823
ENST00000356722
IQCD
XLOC_001259
XLOC_007962
CDS1
THC2767512
XLOC_003202
FAM100B
DOLK
A_33_P3219105
ABR
ITM2B
PBX3
LONRF3
NHSL2
LMNA
XLOC_l2_009883
FAHD1
NOB1
NOB1
NAA20
MED10
SNAI3
LONRF3
RRP15
ATG16L1
IQCF2
STARD8
GPR18
C3orf80
FXN
XLOC_l2_011566
XLOC_l2_000727
GJD3
CTAGE1
GTPBP4
METAP2
C1QTNF3
OGDHL
TAS2R14
UBE2N
CEP97
NKRF
LOC100652730
PRDM8
SAMD15
SNORD48
TP53RK
ONECUT2
FUNDC2
SPAG6
TLE6
ZNF185
GBX2
VDAC2
ALDH1A3
FGD4
ZNF571
LOC100507280
DHRS7
XLOC_008691
XLOC_l2_014421
XLOC_011183
ANTXR2
KCNK2
DACT1
AF461897
XLOC_000642
ENOSF1
AGAP11
SAG
SPAG1
C10orf55
NKRF
LOC100129322
ZNF407
DHRS7
HPDL
XLOC_000972
TP53RK
C21orf63
XLOC_004439
SYF2
XLOC_005963
BAHD1
IZUMO4
BC045633
GJD3
XLOC_008370
ABCC4
FAM189A2
ELK1
SMG7
CALML4
XLOC_l2_011173
ING3
DNAH1
DGKE
HPS1
DUSP7
C1orf145
XLOC_l2_008405
XLOC_009208
DDX20
ZNF185
UBAP2
CDRT15L2
XLOC_l2_008214
ZNF586
LAMA2
XLOC_011056
OTOA
MICU1
LOC100506414
PRSS58
RNF126
CBY3
SLITRK1
CSMD2
A_33_P3355946
FAM35A
RTN1
LOC572558
CLEC2L
XLOC_l2_012071
FECH
MPEG1
MSMB
XLOC_006364
RBBP7
PPP1R37
DENND5B
LOC100287082
XLOC_l2_010984
CSRP1
NRADDP
LOC728190
DHRS7
VAC14
POU4F1
PFKFB3
EPHB2
XLOC_l2_003897
WDR81
CCDC147
MYO15A
CDC42BPG
NACC2
CCDC65
NAALADL2
ENST00000447139
ATL2
XLOC_002262
DTNBP1
ATMIN
XLOC_011383
HIST1H1A
XLOC_l2_008043
PLEKHH2
AMN1
NPAS2
LOC100506284
XLOC_l2_015585
XLOC_005566
RNASE4
A_33_P3295932
GUSBP5
XLOC_l2_007586
LMLN
EIF5A2
TRPC4
CDC123
ZNF185
XLOC_001688
LOC100507309
OTUD4
XLOC_002696
XLOC_l2_004192
PITPNC1
VAMP1
FHOD3
A_33_P3398187
ENST00000390460
ENST00000471090
PDZD3
MARCH8
MALAT1
XLOC_005999
WNT10A
XLOC_l2_006839
ATP2C2
TLCD2
A_33_P3376954
EFHB
DGAT2L7
LRRC29
ADAM32
NACC2
PHLPP2
A_33_P3390939
XLOC_007253
RIOK2
LOC400891
A_33_P3281176
ADAM11
FAM178A
IFT57
A_33_P3312044
LOC100131231
ZNF586
FAM95B1
FBF1
A_33_P3363893
ERBB2IP
LRTOMT
PDYN
ENST00000420509
A_33_P3223142
NANP
XLOC_010556
TRAPPC2
CD69
LINC00102
DAZAP1
BTN2A2
RPRML
LOC728537
PRDM5
PCDHGB8P
ZNF549
ENST00000390600
XLOC_l2_002276
CSGALNACT2
XLOC_009458
GATA4
XLOC_001626
ZNF287
AK123308
LOC284801
CITED1
A_33_P3331911
ZDHHC8
DLX2
C7orf71
SCGB1C1
SPATA13
A_33_P3248774
XLOC_l2_012378
RBM11
ISL1
XLOC_004468
MUSTN1
A_33_P3418846
PLEKHM3
LOC728093
PIK3AP1
PGBD1
TPH1
SPATA6
LOC100507163
XLOC_l2_009285
MIR221
XLOC_005511
XLOC_007192
VAMP1
AB529253
CYP26C1
CHKA
SPANXN1
IL7
SLC44A4
LOC375196
FOXC2
JPX
LOC100506990
ATAT1
FAM98B
XLOC_011523
B3GALT1
ENST00000375955
FECH
XLOC_l2_010751
XLOC_001359
SNORD36B
XLOC_l2_002729
VPS53
ARHGEF26
XLOC_l2_013272
FAM21C
FAM208B
UBE2N
XLOC_002597
TP53RK
C9orf156
CAMKK1
PNMA6C
NACC2
C3orf17
STK10
ZCCHC7
PPRC1
EGR1
B7H6
KLF11
MCOLN3
SLC35D3
WIPF1
GAB2
SMAD3
UBE2N
RECK
ENTPD1
XLOC_004079
LOC100287813
XLOC_007543
PPP2R2C
A_24_P493287
SLCO5A1
XLOC_005433
GLB1L3
XLOC_l2_001421
LOC146880
XLOC_l2_000941
XLOC_l2_009469
GNG11
CFHR1
FLJ33534
MID1
XLOC_l2_008343
EFCAB4B
XLOC_000814
MS4A12
PCDH1
A_33_P3379136
XLOC_000041
XLOC_003156
XLOC_005195
NUDT10
XLOC_003269
LOC440131
GRM6
GJB3
TAS2R9
KC6
LOC645206
CALCRL
C9orf147
ANXA9
XLOC_008079
XLOC_004142
XLOC_003704
OR8H2
XLOC_l2_007986
ATPBD4
SCN7A
AHI1
LOC100507367
ENST00000425320
A_33_P3372207
XLOC_004096
TUBB3
ENST00000326780
LOC100506437
XLOC_004700
CATSPER4
XLOC_013567
ENST00000390440
FLRT3
LOC284950
A_33_P3423202
MAMLD1
XLOC_007306
XLOC_l2_011424
NP511378
XLOC_000259
ESR1
XLOC_005211
CORO2B
XLOC_011152
XIRP2
XLOC_002142
HSD17B13
XLOC_012227
MS4A5
XLOC_000224
A_33_P3371247
C6orf218
XLOC_008903
XLOC_003677
L3MBTL1
KRTAP15-1
ERBB3
ENST00000471857
FAM115C
CPLX3
XLOC_007452
XLOC_010457
LOC100506494
IL10
SOST
CORO2B
XLOC_010436
XLOC_l2_002207
HSPB7
[truncated: 3,473 more rows]

## Sheet: Table S4
Table S4: Gene ontologies enriched in 4 h GNP-exposed cells transcriptome (Cluster 7)
Category	Gene ontology (GO)	GO ID	Total	Changed	%	P-value	FDR (Changed)	Enrichment
regulation of transmembrane transport	regulation of secretion	51046	550	93	16.9091	0	0,0014	1.54525
	neurotransmitter transport	6836	156	34	21.7949	0.0001	0,0026	1.99174
	positive regulation of secretion	51047	283	53	18.7279	0.0001	0,0027	1.71146
	substrate-specific channel activity	22838	330	58	17.5758	0.0002	0,0159	1.60617
	amine transport	15837	80	20	25	0.0003	0,0245	2.28464
	channel activity	15267	351	60	17.094	0.0003	0,0251	1.56215
	passive transmembrane transporter activity	22803	351	60	17.094	0.0003	0,0251	1.56215
	ion channel activity	5216	320	55	17.1875	0.0004	0,0282	1.57069
	active transmembrane transporter activity	22804	248	45	18.1452	0.0004	0,0285	1.65821
	neurotransmitter secretion	7269	132	28	21.2121	0.0004	0,029	1.93848
	regulation of amine transport	51952	71	18	25.3521	0.0005	0,0303	2.31682
	regulation of amino acid transport	51955	29	10	34.4828	0.0007	0,0394	3.15123
	regulation of organic acid transport	32890	51	14	27.451	0.0009	0,0469	2.50863
	neurotransmitter uptake	1504	21	8	38.0952	0,0011	0,0491	3.48136
cellular response to stimulus	signaling receptor activity	38023	730	125	17.1233	0	0	1.56482
	transmembrane signaling receptor activity	4888	639	116	18.1534	0	0	1.65896
	cellular response to organic cyclic compound	71407	279	54	19.3548	0	0,0011	1.76876
	response to steroid hormone stimulus	48545	488	84	17.2131	0	0,0012	1.57303
	G-protein coupled receptor activity	4930	310	58	18.7097	0	0,0032	1.7098
	response to pain	48265	33	12	36.3636	0.0001	0,0133	3.32312
	response to glucocorticoid stimulus	51384	216	41	18.9815	0.0003	0,0242	1.73464
	defense response to bacterium	42742	170	34	20	0.0004	0,0264	1.82771
	response to corticosteroid stimulus	31960	229	42	18.3406	0.0005	0,0291	1.67607
	physiological cardiac muscle hypertrophy	3301	12	6	50	0.0009	0,0478	4.56928
	cellular response to gonadotropin stimulus	71371	21	8	38.0952	0,0011	0,0491	3.48136
immune response	cytokine activity	5125	106	26	24.5283	0.0001	0,0028	2.24154
	interleukin-6 production	32635	86	21	24.4186	0.0003	0,0236	2.23151
	regulation of cytokine secretion	50707	90	21	23.3333	0.0006	0,0315	2.13233
	positive regulation of interleukin-1 alpha production	32730	5	4	80	0.0007	0,035	7.31086
	regulation of interleukin-1 alpha production	32650	5	4	80	0.0007	0,035	7.31086
	negative regulation of cytokine secretion	50710	29	10	34.4828	0.0007	0,0394	3.15123
	regulation of interleukin-6 production	32675	85	20	23.5294	0.0007	0,0403	2.15025
	positive regulation by organism of immune response of other organism involved in symbiotic interaction	52555	12	6	50	0.0009	0,0478	4.56928
	positive regulation by symbiont of host immune response	52556	12	6	50	0.0009	0,0478	4.56928
	microglial cell activation	1774	16	7	43.75	0.0009	0,0484	3.99812
	positive regulation of interleukin-1 production	32732	26	9	34.6154	0,0012	0,0495	3.16335
cell differentation	regulation of macrophage derived foam cell differentiation	10743	20	9	45	0.0001	0,0138	4.11236
	regulation of metanephros development	72215	20	9	45	0.0001	0,0138	4.11236
	positive regulation of osteoclast differentiation	45672	20	9	45	0.0001	0,0138	4.11236
	macrophage derived foam cell differentiation	10742	22	9	40.9091	0.0003	0,0258	3.73851
	foam cell differentiation	90077	22	9	40.9091	0.0003	0,0258	3.73851
	osteoclast proliferation	2158	5	4	80	0.0007	0,035	7.31086
	regulation of mesenchymal to epithelial transition involved in metanephros morphogenesis	3339	8	5	62.5	0.0007	0,039	5.71161
	positive regulation of myeloid leukocyte differentiation	2763	45	13	28.8889	0.0008	0,0447	2.64003
	male sex differentiation	46661	165	32	19.3939	0.0009	0,0485	1.77233
metabolic process	positive regulation of steroid biosynthetic process	10893	20	10	50	0	0,0012	4.56928
	positive regulation of steroid metabolic process	45940	27	11	40.7407	0.0001	0,0034	3.72312
	growth factor activity	8083	81	21	25.9259	0.0001	0,0136	2.36926
	sulfotransferase activity	8146	41	12	29.2683	0,0011	0,049	2.6747
developmental process	trigeminal nerve development	21559	5	4	80	0.0007	0,035	7.31086
	cell growth involved in cardiac muscle cell development	61049	12	6	50	0.0009	0,0478	4.56928
regulation of cell communication	regulation of transmission of nerve impulse	51969	290	54	18.6207	0.0001	0,0027	1.70166
	regulation of synaptic transmission	50804	262	51	19.4656	0	0,0031	1.77888
	regulation of neurotransmitter levels	1505	173	39	22.5434	0	0	2.06014
	smooth muscle cell migration	14909	52	15	28.8462	0.0003	0,024	2.63613
	regulation of vascular endothelial growth factor production	10574	23	9	39.1304	0.0004	0,0288	3.57596
	integral to lumenal side of endoplasmic reticulum membrane	71556	28	10	35.7143	0.0005	0,03	3.26377
	vascular endothelial growth factor production	10573	24	9	37.5	0.0006	0,0324	3.42696
	development of primary male sexual characteristics	46546	156	31	19.8718	0.0007	0,0403	1.816
	muscle cell migration	14812	62	16	25.8065	0.0008	0,0456	2.35834
	vascular endothelial growth factor receptor signaling pathway	48010	51	14	27.451	0.0009	0,0469	2.50863
	physiological muscle hypertrophy	3298	12	6	50	0.0009	0,0478	4.56928

## Sheet: Table S5
Table S5: Full list of genes of Cluster 4 which is activated after exposure to free GSNO and GNP for 4 h
7533 genes
SLC25A48
C8orf68
LACTBL1
XLOC_l2_000080
CMKLR1
XLOC_011348
XLOC_l2_002355
TSPY26P
GPATCH4
XLOC_002941
DIS3L2
Q6TXI9
LHX4
XLOC_008838
PDPR
GSTA3
XLOC_l2_015090
EDAR
MIAT
XLOC_014132
ZNF702P
B3GALT5
PPBP
XLOC_012150
KCNQ4
XLOC_004576
C2orf27B
SPEG
XLOC_001394
XLOC_009229
XLOC_005485
HSD3B1
ANKDD1A
ENST00000390369
XLOC_009787
XLOC_004230
HSPBAP1
ZNF711
LOC200261
LOC100131174
SLC30A5
XLOC_007341
A_33_P3368822
LOC100132174
XLOC_003890
XLOC_012502
LOC100131907
SLFN14
KNDC1
A_33_P3404116
GPR174
EYA3
XLOC_003686
RHOD
HSPA8
NAB1
C10orf2
ADAMTSL2
C9orf30
RASAL2
MDM4
XLOC_002900
FLJ40292
XLOC_010949
KRTAP22-2
SLC39A14
XLOC_006486
XLOC_l2_003888
XLOC_007085
A_33_P3317761
ANKRD17
LOC100506392
LOC400958
EPHA7
A_33_P3384265
RPGR
BZW2
NECAP1
SAR1A
XLOC_l2_013873
XLOC_005793
MTRNR2L4
FHL5
PSMB7
LOC100653108
XLOC_001564
XLOC_l2_000010
THAP5
LDHAL6B
LOC100507006
XLOC_004984
SIAH1
SNORD69
A_33_P3280502
ERMN
ROR1
MCTP1
RPS6KA2
A_33_P3399911
XLOC_l2_013457
FLJ43663
NEAT1
XLOC_011704
LOC100131492
EID3
ACTRT2
IPPK
ANKRD27
XLOC_007910
C5orf65
NAMPT
KDM2B
HCG18
MAFF
DUSP2
MAFF
ULK3
WDR12
SMG1
XLOC_l2_008140
NR1D1
ACSL1
DISC1
LOC100131581
TBC1D14
PHEX
SLC7A1
ZNFX1
GPR137B
ZFAND5
CPNE7
FCGR1B
KDM2B
KLHL12
ACSL1
PLAU
SRRD
AK130766
INF2
SNORD5
TBPL1
XLOC_l2_001648
ANAPC1
HIST1H1T
VTI1A
PCDHGB3
FXR2
SERPINI1
DDX21
ATP1A1
XLOC_004456
ZNF571
LOC646778
LOC100506299
LOC650293
PTCD2
MTSS1L
AP1S3
LOC100287497
ZNF511
ACVR1B
XLOC_013739
MST1P2
A_24_P196019
CRISPLD2
BEX4
USP31
LOC283104
TAB3
XLOC_009158
DCAF4
FRY
PHF7
PVT1
FAM57A
SNORD6
DNAJB6
ENST00000518355
P39188
CLC
XLOC_003874
FAT4
A_33_P3415310
LOC100506314
LOC100507803
XLOC_003680
CDC14C
ENST00000536986
XLOC_l2_011291
TPTE2P1
NPSR1
C2orf65
LOC100653033
A_33_P3415826
C14orf37
NMUR2
XLOC_007181
XLOC_011858
LOC100506630
LOC440742
XLOC_005492
KCNE2
FRMD5
GRIK2
XLOC_l2_000279
PGAP1
SPINK5
XLOC_000550
XLOC_001025
LCE2B
C6orf103
XLOC_013765
ENST00000511256
XLOC_011675
LGI2
XLOC_l2_008124
XLOC_000922
XLOC_l2_011309
XLOC_001776
ENST00000443165
XLOC_009677
XLOC_000698
XLOC_l2_009172
CRCT1
ADH1A
KRTAP3-1
PDZRN4
ENST00000554907
HCAR1
XLOC_004727
B2M
SNORD99
RASGRF1
MGAT1
UQCRFS1
SNX27
PRDM2
ACSL1
SASH1
MAGI2-AS3
CCND1
CCND1
TAGAP
ACSL1
PLCB1
CCND1
ACSL1
ACSL1
MXRA7
WTAP
RNF185
BHLHE41
NOTCH1
EPSTI1
ACSL1
PKNOX2
CFLAR
VMP1
AHR
PPARG
ACSL1
NOTCH1
LOC283028
LOC647979
FAM60A
RRN3
BF346224
ENST00000398067
A_33_P3293529
ATP6V1C1
LOC388796
XLOC_005077
A_24_P152983
THC2698732
FCGR1B
SNORD56B
SYNJ2
TRMT61A
BET1L
XR_108367
PARD3
XLOC_l2_007834
LOC283547
XLOC_000920
GPR35
XLOC_l2_002311
LOC100130542
A_24_P84401
A_33_P3238611
XLOC_l2_013192
XLOC_003808
ZNF479
CCDC54
RPL23AP32
AIRE
A_33_P3358019
ENST00000390312
XLOC_010676
GRP
LOC388630
XLOC_004058
TBC1D29
MFAP2
XLOC_l2_006033
LOC100133306
LOC100128644
SLIT3
HAS1
XLOC_003976
CYP2A13
XLOC_l2_011692
LOC440131
THC2526367
CD3D
A_33_P3419204
XLOC_003514
PCP4L1
XLOC_007215
ENST00000372387
XLOC_001560
KPNB1
GARS
SLC7A2
THUMPD2
AKAP5
RECQL5
LOC100131551
LOC442421
LOC100506769
LOC283214
SNORA70B
AK096231
XLOC_004799
SEMA7A
A_33_P3361711
MRPS2
KRTAP5-1
XLOC_000201
CCDC80
XLOC_005057
XLOC_004635
FSCB
IL37
LOC100507378
XLOC_012596
LOC149351
RGN
XLOC_002688
WDR33
ENST00000390345
MCMBP
MCART1
RAB21
BLOC1S3
PIGL
HAUS6
CD58
OVGP1
ZNF263
ATF5
ASXL2
ZBTB25
DUSP14
FBXO28
BCL2L2
NCAPH
RNF149
MED10
DOLK
LRRC3
YY1AP1
ORC6
ABI2
TP53RK
THC2464556
LOC100130331
DEFB127
SMOX
XLOC_l2_007478
XLOC_012226
OPN1SW
XLOC_007052
XLOC_l2_001592
XLOC_011299
XLOC_012598
HEPN1
A_33_P3395630
XLOC_005331
PDCL2
FCAR
XLOC_010200
OTOG
PCDHA4
A_33_P3240234
XLOC_l2_009886
VTI1A
FAM74A1
LINC00229
AKAP4
LCN6
XLOC_003211
XLOC_000625
LOC388630
XLOC_l2_000267
XLOC_002796
XLOC_009100
XLOC_000035
THC2773189
FREM1
LOC729454
XLOC_008151
TBC1D21
XLOC_l2_001640
XLOC_005466
CTAGE10P
XLOC_008833
XLOC_012095
XLOC_008561
FGA
XLOC_010962
GSTTP1
XLOC_003305
XLOC_l2_001011
SERPING1
ENST00000519537
ZNF599
XLOC_000036
BTNL3
OR2AT4
AGBL4
XLOC_013776
CD48
XLOC_007189
XLOC_003305
XLOC_007178
XLOC_004651
XLOC_010585
MGC16142
XLOC_002184
NP511549
MUC22
WDR25
PRDM16
ZNF35
FAM171A1
XLOC_002066
CD300LD
WFDC6
XLOC_000617
PRY2
FCRL3
XLOC_006433
XLOC_000357
LOC100130744
FAM75C2
PRUNE2
XLOC_005173
Q9B8G3
XLOC_001649
CHI3L2
GATA4
CCR8
SLC1A7
XLOC_006360
ENST00000556472
LOC100506546
PKDCC
A_33_P3320415
DNAH12
XLOC_012695
SNORD114-22
XLOC_014018
CSF3
XLOC_012457
CCDC36
XLOC_006188
LOC285286
RAB39B
BSPH1
A_33_P3405249
XLOC_011030
LOC100127940
KRT80
PBX1
XLOC_003636
C18orf21
XLOC_005539
SH2D6
XLOC_000818
XLOC_000318
CDX4
XLOC_009326
XLOC_009258
XLOC_010177
NDN
FGF23
XLOC_006508
TBX5
POM121L2
XLOC_005783
TUSC3
SPEG
THC2658818
TRIM49
C11orf34
XLOC_007483
NP366222
XLOC_010988
PADI4
XLOC_007754
XLOC_005040
LINC00472
FUT3
XLOC_l2_013963
XLOC_009531
CFHR3
PRAMEF7
XLOC_012315
SLC2A11
AKAP12
C11orf91
PIWIL1
OR4A47
XLOC_004900
ZNF713
ENST00000449462
AGR3
XLOC_004822
LOC100130071
FCRLB
AK074144
LOC100130093
NRN1
LEP
NT5C1B
SSX2
XLOC_013781
SNORD114-11
A_33_P3338379
XLOC_003222
XLOC_005871
XLOC_012767
XLOC_004409
XLOC_005668
TMC1
GRIK1
FLJ44674
XLOC_010167
XLOC_l2_003234
CYP21A2
ENST00000424969
XLOC_l2_010330
CDRT1
Q952V6
XLOC_l2_009571
XLOC_001927
XLOC_009224
ADAM30
XLOC_002407
XLOC_012343
STARD9
XLOC_l2_013835
XLOC_002069
SLC8A3
XLOC_009274
XLOC_l2_001097
XLOC_005209
CHRM5
GABRR3
ENST00000409819
XLOC_012852
C14orf48
AK7
ARHGAP21
LOC388210
XLOC_006220
PLCE1
XLOC_010491
C6orf132
XLOC_004495
XLOC_l2_013795
XLOC_l2_015453
XLOC_006972
XLOC_009639
FSIP1
DSPP
ALLC
XLOC_009780
XLOC_004682
AKAP12
XLOC_l2_007470
IGSF3
XLOC_010933
XM_001725956
FZD10
LOC100289580
XLOC_006043
MUC17
XLOC_008844
RNF17
FAM41C
XLOC_002715
XLOC_l2_000961
DRD3
XLOC_001414
ABCB1
XLOC_001079
S100A7L2
ENST00000330898
XLOC_012041
XLOC_010640
LOC100271702
A_33_P3288079
ENST00000549953
XLOC_010576
ADAM21
ENST00000413986
ZNF835
USP17
ENST00000462928
XLOC_007219
MRPS22
SCNN1A
XLOC_004177
NRG3
XLOC_005677
ENST00000540599
MSLNL
XLOC_003455
LOC100270746
ANKRD31
XLOC_l2_011692
A_33_P3283700
LINC00277
MFI2
XLOC_002469
XLOC_l2_010963
SNORD114-12
XLOC_000505
XLOC_000339
ANGPTL2
XLOC_013660
XLOC_008633
EFHD1
XLOC_009927
XLOC_011448
XLOC_011930
GPR115
CTLA4
XLOC_009955
ENST00000422143
REXO1L1
SLC45A1
ENST00000419440
DR007930
XLOC_010469
BCL7C
PRAMEF4
LINC00256A
XLOC_009828
CSF3
IL28B
TRIML1
XLOC_013487
XLOC_004475
DEFB103B
KCNAB3
FATE1
A_33_P3334803
XLOC_005172
XLOC_l2_000915
XLOC_010648
XLOC_008525
POLR2E
XLOC_002897
TSPAN7
PDC
MIA2
ARAP2
XLOC_003919
GPR146
OR10Z1
XLOC_008407
XLOC_008643
FBLIM1
XLOC_l2_015170
XLOC_005607
FLJ44087
SUSD2
XLOC_004598
LOC100506272
ENST00000425264
LOC100507401
XLOC_004120
LEP
LOC100505967
XLOC_009984
FASLG
XLOC_010880
XLOC_008653
ANKK1
XLOC_013480
XLOC_005406
XLOC_009696
LOC100652962
PDZD2
XLOC_002498
LOC729706
C20orf152
A_33_P3377714
ENST00000433310
CDH4
WBSCR28
XLOC_l2_012871
OR10A3
XLOC_003430
XLOC_010385
SIGLECP3
MME
XLOC_011135
XLOC_l2_005921
LAMB1
XLOC_005566
XLOC_002010
KIRREL3
KCNC2
XLOC_000205
XLOC_011134
ENST00000450891
LOC283332
DBH
LMOD1
XLOC_003703
LOC100505856
XLOC_004046
DDI1
DA797466
FKBP9
A_24_P940477
XLOC_l2_014076
TSNAXIP1
XLOC_013049
LAMC2
SERPINB12
XLOC_l2_011969
XLOC_006140
LOC100289255
PRODH
XLOC_009791
A_33_P3402225
XLOC_005181
SNORA65
LOC100287294
MUC15
PRH2
XLOC_l2_011669
UBASH3A
C11orf41
MYO3B
TMEM236
HS3ST1
SSX3
MGAT4C
XLOC_l2_000866
TNNT3
LOC152225
XLOC_004107
IL24
SNORD115-48
XLOC_l2_010833
HS2ST1
HSD11B2
XLOC_011138
XLOC_011827
THC2481061
XLOC_011382
XLOC_001313
SPTBN4
XLOC_010165
XLOC_011597
XLOC_009626
LOC400238
XLOC_011481
C22orf33
RGN
SDK2
TCTE3
EGLN3
XLOC_010924
MAGEA10-MAGEA5
AFAP1-AS1
HOXB1
FAM75D3
XLOC_l2_013859
XLOC_004169
THC2757083
PDCD6IP
LIX1
XLOC_012567
GPM6A
SNORD114-3
XLOC_008299
RASGEF1A
RARB
RPL31P11
RPS17
WNT10A
CLDN14
XLOC_010456
XLOC_003804
XLOC_l2_010772
XLOC_l2_013921
SNORD114-4
C9orf117
XLOC_012698
XLOC_010183
XLOC_010799
XLOC_011769
XLOC_004913
XLOC_007819
XLOC_008587
KCNJ12
XLOC_001905
XLOC_002563
CLEC1B
LOC100129936
XLOC_014192
CERCAM
LOC283089
XLOC_010677
XLOC_l2_010616
TMEM26
MAS1
XLOC_013874
ADAM3A
XLOC_002198
OR14A16
XLOC_l2_011302
KRT36
XLOC_011481
LOC100291105
XLOC_011537
IGFL3
XLOC_l2_009508
XLOC_l2_009539
TMPRSS15
MAGI1
FNDC4
SEPP1
CYTL1
XLOC_004470
XLOC_010791
IL16
XLOC_011618
TREML3
XLOC_013742
SNORD116-13
FLJ16734
ENST00000433072
XLOC_004074
XLOC_004514
XLOC_003970
ENST00000390632
WDR20
Q5C5N0
MXRA8
A_33_P3223663
LOC729177
FOXA1
DPCR1
CD22
XLOC_006560
XLOC_013447
XLOC_010654
C2orf62
CC2D2B
XLOC_009395
CST6
XLOC_011810
HOXC13
AKR1CL1
XLOC_l2_001911
CYP2C8
SNAR-C3
XLOC_l2_009216
XLOC_000855
APOA1
XLOC_004831
PALM3
MYF5
A_33_P3373200
GOLGA6L5
PDE1A
ENST00000375325
DDX43
AANAT
LOC100507443
OR52E2
XLOC_001848
XLOC_003384
BTN3A1
DEFB112
XLOC_009464
ENST00000269201
HSPA1L
A_33_P3233085
A_33_P3268161
XLOC_003331
XLOC_l2_015315
FOXA1
FLJ42102
XLOC_l2_000196
LOC401134
ENST00000390432
ENST00000390622
XLOC_002241
CDR2L
LOC730668
GRXCR2
HYALP1
XLOC_008901
LOC343052
A_33_P3351790
SLC47A2
XLOC_l2_015075
LOC157381
MMP27
XLOC_003187
ARHGAP36
A_33_P3349255
TMPRSS15
XLOC_000160
CES1P1
NCAM1
A_33_P3244713
XLOC_013545
NKX2-1-AS1
FMN2
XLOC_002478
XLOC_l2_001537
LOC100131497
Q9RWL9
MARVELD2
NPPC
LOC154449
XLOC_l2_008624
XLOC_005550
EDAR
SNORD113-8
TBX15
XLOC_000671
OR4F15
XLOC_001903
ENST00000420143
XLOC_008340
NTNG1
XLOC_l2_007204
UGT2B11
LSR
NRP2
XLOC_007182
XLOC_l2_011309
XLOC_l2_010494
LOC100288368
XLOC_004617
NP113766
VTI1A
XLOC_007630
CXCL13
A_33_P3286357
XLOC_001851
LOC128322
TNFSF18
LOC100130331
FAM27L
OR5A2
HSD17B2
XLOC_000011
MANBA
LOC285857
ARMCX4
XLOC_003791
CT47A11
C10orf53
C6orf186
XLOC_006813
XLOC_012193
LOC100506013
LOC100506368
XLOC_004076
RGN
XLOC_004965
MIA2
TM4SF20
LOC729706
SPTLC1
A_33_P3312147
XLOC_008737
C7orf52
XLOC_013684
ENST00000510551
XLOC_007214
XLOC_007262
SDK2
XLOC_012608
XLOC_l2_013734
MIAT
LOC100652778
DPPA3
XLOC_005793
XLOC_000471
XLOC_002695
LOC100132215
FASLG
XLOC_l2_011309
XLOC_007745
MECOM
FXYD3
XLOC_010309
LOC283299
XLOC_011999
C3P1
XLOC_l2_004050
XLOC_l2_012366
DEFB110
TTC28-AS1
FABP7
CDX2
XLOC_l2_015315
LINC00313
XLOC_l2_003295
XLOC_012984
A_33_P3342195
GIF
ALDH3A1
CAPZA3
XLOC_l2_015803
LOC100128682
A_33_P3234555
TNFSF18
A_33_P3284873
SPTB
HS1BP3
XLOC_013742
XLOC_010727
XLOC_013993
A_33_P3248997
THC2682885
XLOC_004286
GNGT1
XLOC_006270
TFCP2L1
LOC100507325
C15orf34
XLOC_006332
NEIL2
IFNW1
XLOC_l2_006994
ENST00000426471
XLOC_000264
SPACA5
XLOC_008848
XLOC_007162
CCDC135
XLOC_004122
ITGBL1
XLOC_l2_005130
TMPRSS15
SEC14L3
LIMS2
NRXN1
XLOC_011672
CKAP2
XLOC_l2_003414
OR5K2
XLOC_013875
FERMT2
LOC285000
LOC284191
XLOC_l2_007541
MEPE
XLOC_l2_012931
LRRC6
XLOC_004073
C10orf90
XLOC_001871
BC150587
KCNK18
XLOC_011525
XLOC_000984
XLOC_012687
LOC100506563
AK172772
ENST00000390437
LOC100506594
CFH
XLOC_006487
XLOC_003974
XLOC_012115
PMP22
XLOC_011367
DOC2B
C19orf76
XLOC_012112
XLOC_012253
WISP2
ARMC4
OR8J1
MOB3B
FCRL3
FLJ45139
FLJ13197
MYOM3
TNFRSF11B
XLOC_014029
A_24_P281447
ENST00000390372
OR5B2
MIAT
C19orf29-AS1
XLOC_007402
XLOC_003435
SCARA3
XLOC_l2_014566
OTOGL
XLOC_009526
FEZF1
ENST00000367561
OR2M4
XLOC_013545
XLOC_008974
XLOC_002058
XLOC_003825
LOC285766
TGM2
ABCB1
LOC100505904
XLOC_012822
AMBP
A_33_P3276386
LOC100128054
OR4D9
LOC149773
PRO1768
BCL6B
A_33_P3313552
CHI3L2
GNGT1
DA717721
GPM6A
XLOC_008603
LRRC18
FERMT1
XLOC_003313
XLOC_l2_000514
OR4F6
XLOC_012762
C8orf75
OR6K6
XLOC_012779
KRTAP4-1
XLOC_008148
A_33_P3249897
SPANXN5
XLOC_009765
XLOC_l2_014955
ENST00000545549
XLOC_013458
XLOC_l2_011805
C4orf36
C1QTNF9B
N4BP3
XLOC_006102
BIRC8
AKAP4
P2RX6
SNORD114-15
SLITRK2
XLOC_014073
OR51B2
BC029043
XLOC_006082
ALLC
XLOC_003913
FLG
GUCY1A3
NEXN
XLOC_l2_000691
XLOC_004080
XLOC_l2_009469
XLOC_l2_007315
XLOC_011080
LOC100507066
XLOC_009852
XLOC_010106
KRT24
C9orf41
XLOC_011725
GPR34
SNORD114-24
TCEB3C
LOC338667
XLOC_l2_001573
DDC
C1QTNF9
LINC00472
PLA2G10
SERPINA4
ENST00000517343
XLOC_001337
XLOC_010243
XLOC_002675
MGAT1
CDX4
SEC14L3
XLOC_006097
XLOC_008300
XLOC_002795
LOC440900
XLOC_003735
RAPGEF5
XLOC_002283
CASC4
BGN
XLOC_l2_013554
SNORD114-17
CHI3L2
ATP8A2
LHFPL1
XLOC_l2_002043
DPCR1
CADPS
MIAT
CV572371
XLOC_l2_004192
BMP7
OR4B1
A_33_P3410445
LOC100132987
LINC00189
XLOC_l2_015593
NCKAP5
Q952V6
XLOC_005377
XLOC_l2_014057
HOXD11
SMCR5
XLOC_000451
LOC100134256
F2
XLOC_013828
THC2622306
XLOC_004624
FASLG
C11orf52
PPP1R14D
OR13C3
XLOC_l2_007060
LOC442028
A_33_P3327336
COL1A2
XLOC_l2_000900
C11orf16
ENST00000444001
MAP3K9
LILRA5
UNC5CL
C7orf63
XLOC_002717
DMGDH
FAM83G
XLOC_002725
CFHR3
XLOC_012590
BZRAP1
ENST00000436605
ABCC8
XLOC_007832
LOC283761
IL28RA
LOC100506329
THC2619391
XLOC_l2_010258
COL1A2
OR10H5
XLOC_010244
IFNG
C10orf92
KLK5
PKD1L3
OR9G4
XLOC_002013
LRRC6
C6orf123
CHRNA2
XLOC_003422
XLOC_003649
XLOC_007435
XLOC_008418
SOHLH1
XLOC_006178
LOC441204
SELV
A_33_P3358653
A_33_P3231437
XLOC_009187
MORN4
XLOC_002654
XLOC_008417
A_33_P3229587
XLOC_005010
DMD
XLOC_012069
GRID1
A_33_P3343340
LZTS1
XLOC_000556
GABRB3
XLOC_006731
APOF
LOC441204
SSX3
C1orf61
XLOC_006666
AZGP1
TNNI3K
XLOC_006999
LOC100505701
XLOC_005930
LOC728763
CMKLR1
C10orf47
C14orf91
XLOC_003479
XLOC_009283
ENTHD1
ANKRD30B
PAIP2B
HYAL1
XLOC_004527
ANO9
A_33_P3358863
XLOC_007078
SPRR4
A_33_P3405571
XLOC_004823
XLOC_l2_013877
NP511204
DPP6
XLOC_012637
XLOC_l2_013633
XLOC_l2_001810
XLOC_006336
XLOC_003733
PAX2
XLOC_011359
CTRC
AK090403
XLOC_002858
XLOC_l2_012159
ENST00000431202
FCRL3
XLOC_008062
RTN4RL1
XLOC_l2_009477
ADARB2
XLOC_013293
CMKLR1
A_33_P3404685
C17orf76-AS1
RFPL1
BC037972
LMOD1
LAMA3
ENST00000390603
LRRIQ4
XLOC_009784
B3GALT5
LOC100335030
XLOC_007747
XLOC_004743
NRP2
THC2784943
XLOC_001488
XLOC_000540
XLOC_l2_002290
LOC388946
XLOC_008990
XLOC_l2_015101
BC131577
PLSCR5
C2orf53
XLOC_008473
XLOC_002886
BEND6
S100Z
A_33_P3226680
XLOC_004945
ABCB1
XLOC_l2_009613
XLOC_006815
XLOC_004849
NUAK1
GPR174
XLOC_005355
CDKN2B
XLOC_011136
NOM1
AF194718
XLOC_008609
XLOC_l2_013116
A_33_P3326827
KRT33B
DAB1
XLOC_004632
XLOC_002446
XLOC_005366
GPR139
GAB4
IGF1
XLOC_006683
XLOC_003734
SCN1B
TRIM55
A_33_P3305462
XLOC_010599
XLOC_000392
XLOC_008081
A_33_P3406530
XLOC_007558
OR51I2
MATN1
FUT9
XLOC_003455
BF175071
XLOC_l2_013978
XLOC_004465
HM236769
FASLG
XLOC_000352
COX7B2
BX098631
GALNTL2
CDHR5
OR6V1
XLOC_l2_010011
XLOC_009547
XLOC_012324
ENO4
XLOC_001273
XLOC_004739
XLOC_012568
SSTR2
CYP3A5
A_33_P3216621
GPR174
VCAM1
PALM2
LOC100129060
XLOC_004969
A_33_P3320698
XLOC_010243
XLOC_010923
DPYS
KLC2
ENST00000448174
LOC200726
XLOC_000730
XLOC_004343
LOC100506963
XLOC_009856
XLOC_010932
XLOC_013653
XLOC_010881
RFT1
LOC100506708
XLOC_001993
XLOC_000280
OR2G3
A_24_P247454
ENST00000421045
FAM110C
RXRG
DIO3
XLOC_001910
XLOC_013825
KCNC1
XLOC_000115
SPATA21
FASLG
SNORD123
XLOC_005087
TM4SF20
XLOC_003732
XLOC_013775
ENST00000399806
XLOC_l2_010449
XLOC_013552
A_33_P3397573
KIAA1984
XLOC_001958
SCN2A
ENST00000377597
SPERT
XLOC_008793
OR10K1
HIF3A
SOX6
A_33_P3340114
XLOC_000615
XLOC_002701
ANKS1B
XLOC_004502
XLOC_005215
POU1F1
LOC283854
REG3A
XLOC_001618
XLOC_009344
XLOC_004308
XLOC_008689
XIST
ENST00000487727
LOC644662
ALLC
WBSCR22
A_33_P3255135
RAG2
XLOC_010897
XLOC_006521
XLOC_000034
XLOC_001497
FLJ35424
WDR69
A_33_P3279984
NXNL2
AQP6
LOC100506801
XLOC_008726
XLOC_000311
XLOC_l2_010933
MYOCD
XLOC_002177
XLOC_011569
XLOC_010069
C10orf112
ENST00000413619
COL1A2
XLOC_011413
TAS1R3
XLOC_007131
DLX6-AS1
TMEM100
KRTDAP
XLOC_006457
XLOC_003934
LMOD3
XLOC_000318
ENST00000390600
A_33_P3314352
XLOC_l2_013099
XAGE2B
LOC100652988
XLOC_008495
HFE
XLOC_012891
A_33_P3320212
XLOC_l2_009319
ATP13A4
XLOC_009563
XLOC_l2_012605
GCNT4
USP29
SDR42E1
C18orf62
F5
HLA-DQB2
FCRL5
MAGEE2
LOC100129407
XLOC_004410
GIPC2
RIMS4
XLOC_003962
SSX3
XLOC_012324
TREML4
DISC2
PRAMEF5
LOC100131532
DNAH17
REM2
LCN2
NP511085
A_33_P3349853
XLOC_008509
C2CD4D
UMODL1
LOC285401
FLJ33630
XLOC_002867
XLOC_l2_013481
SRRM3
TULP1
TNFRSF11B
PKD2L1
EPB49
XLOC_l2_007191
XLOC_009266
LINC00371
LEP
XLOC_011573
XLOC_006686
XLOC_012568
XLOC_000617
OR1L1
LOC157381
XLOC_009399
LOC100128591
CNGB3
MUC6
ENDOU
XLOC_l2_006080
F2
XLOC_005052
LOC286190
XLOC_005773
XLOC_006483
ENST00000390454
DEFB108B
ENST00000390316
XLOC_001077
LOC729451
XLOC_000186
XLOC_005302
XLOC_011189
LIMS3-LOC440895
XLOC_003772
XLOC_010826
LOC100131581
SAMD14
NGEF
A_33_P3224181
BC058547
ARL14
SEC14L6
XLOC_l2_010586
C18orf21
A_33_P3391390
XLOC_006892
DA144211
XLOC_013687
XLOC_012065
A_33_P3309725
ENST00000509911
XG
XLOC_005972
LOC339593
LOC100507377
NEDD9
LOC339685
C17orf51
XLOC_l2_011102
LOC100509315
KIAA1656
CCDC91
MUM1L1
LOC100505525
KLHL10
LDLRAD1
HAO2
XLOC_012196
LOC283867
XLOC_003548
LINC00222
CD72
FOXA1
XLOC_010556
LOC100129312
FLJ22763
PLEKHG1
GPR26
ENST00000418834
LOC100131060
XLOC_002524
WDR53
XLOC_006811
XLOC_000844
XLOC_011620
CHI3L2
CDH13
ENST00000355281
LOC729444
XLOC_l2_014294
AK126601
LOC100129055
XLOC_012482
XLOC_013178
XLOC_009070
ENST00000306803
XLOC_012366
LOC153910
DA194689
ENST00000441955
XLOC_004453
T
SCN5A
WISP3
XLOC_003075
PCDH15
XLOC_002504
LOC286094
LINC00310
XLOC_003337
XLOC_003915
ENPP1
TMEM132C
LOC100505663
CHRD
XLOC_004706
LAMB4
AQP7P3
XLOC_014158
XLOC_005411
XLOC_009879
LOC100652768
XLOC_003508
CEP112
XLOC_l2_014219
XLOC_l2_003803
A_33_P3289093
TDGF1
A_33_P3251412
XLOC_001355
XLOC_000114
XLOC_011673
ATP2B2
XLOC_001406
A_33_P3251868
XLOC_010585
LOC283692
XLOC_011980
SERPINB12
SPEG
XLOC_l2_008200
OR5R1
C1R
KRT42P
PLA2G2D
TUBAL3
GSG1
LOC100505528
A_33_P3289501
SPRR2A
XLOC_002698
PRAMEF2
HRASLS2
A_33_P3338873
NOSTRIN
XLOC_001901
THC2648557
TCL6
LOC644192
ST6GAL2
XLOC_006774
XLOC_004325
LOC727775
XLOC_010856
HOTAIR
ENST00000317359
DZANK1-AS1
PAPPA2
C1orf100
PCDHA8
KRT16
CDX4
CCDC152
LOC257358
XLOC_001613
LOC284950
LOC392364
XLOC_011422
THEG5
XLOC_l2_013772
XLOC_010804
LOC100505718
XLOC_l2_009216
XLOC_001870
XLOC_009143
C6orf105
ENST00000378007
IGF1
XLOC_005589
KRT25
EPHA7
XLOC_l2_009833
KRT72
LOC100507547
WDR65
KLK14
LOC100287366
VPS52
SNORD114-31
IGFL2
XLOC_001540
NDST3
RALYL
XLOC_l2_002469
TTTY3
MYH13
TRPM6
WNT5B
XLOC_014386
XLOC_000832
ENST00000332043
XLOC_001280
LIMS3L
A_33_P3374982
XLOC_002236
GNAT1
ENST00000523112
XLOC_000269
XLOC_000553
C8orf86
XLOC_l2_002254
XLOC_l2_012844
XLOC_008669
XLOC_008466
KIAA0509
XLOC_002663
XLOC_005741
TM4SF20
XLOC_006821
PADI6
XLOC_000928
OR6N2
MIAT
XLOC_011282
LOC100130811
LOC100128077
XLOC_007920
LOC100422737
XLOC_011821
XLOC_014216
MAP3K12
XLOC_l2_011322
FUT1
XLOC_000515
HABP2
XLOC_011679
ABHD12B
GLYATL2
ENST00000399966
SNORD114-29
HCG9
A_33_P3419875
PLEKHD1
A_33_P3406821
ENST00000442233
OR10W1
STC2
LOC100507261
CEL
KCNV2
XLOC_001309
LOC441179
XLOC_l2_007167
XLOC_004346
C8orf80
LOC285286
XLOC_005954
XLOC_004290
LOC100505495
BDKRB2
XLOC_001544
LOC100506766
XLOC_010214
TSPAN16
ASB11
CDX4
XLOC_000214
IQCH
C16orf89
XLOC_l2_009613
XLOC_001321
BOLL
XLOC_007090
XLOC_010421
XLOC_008342
IGFL1
KCNQ1
XLOC_014105
ACMSD
XLOC_002486
XLOC_013743
A_33_P3312784
THC2494175
XLOC_000697
LUZP4
XLOC_004598
XLOC_013043
FGF12
EDAR
CACNA1G
XLOC_l2_003877
IL18R1
ENST00000390463
NOX5
FAM75A3
XLOC_007082
XLOC_l2_014388
SPRR2B
XLOC_002206
XLOC_l2_013491
XLOC_008792
XLOC_005935
LINGO1
XLOC_013531
ENST00000457402
XLOC_014196
XLOC_013680
LOC100506835
ENST00000549180
LOC285796
GPM6A
XLOC_007350
XLOC_013278
XLOC_013563
LOC100130468
XLOC_l2_011095
TP53
LOC100132014
XLOC_002853
LOC100292909
XLOC_l2_008316
NCR1
XLOC_002478
XLOC_l2_015302
XLOC_013486
TEX21P
CYP11B2
XLOC_004147
C21orf88
XLOC_001054
XLOC_002117
XLOC_013100
REG1P
LOC100508869
ADARB2
XLOC_000015
XLOC_l2_012035
LOC100134368
XLOC_l2_009899
MASP1
XLOC_001866
XLOC_004276
XLOC_010057
XLOC_013041
EFNA2
OR14I1
XLOC_013577
SYCP1
XLOC_003172
XLOC_012227
DCAF8L1
ANKS1B
XLOC_002906
XLOC_008388
AK091161
XLOC_005500
XLOC_005152
XLOC_010492
LEP
LOC100271832
A_33_P3248948
XLOC_006652
SLC13A5
XLOC_007064
C2orf57
LINC00305
ENST00000374801
XLOC_008612
LOC730159
MYPN
ENST00000390375
XLOC_011880
XLOC_003573
MIER3
XLOC_l2_008692
LOC728377
XLOC_009046
EPHB2
XLOC_005534
GNG3
XLOC_002485
ZNF781
KRT14
MFSD6L
[truncated: 5,535 more rows]

## Sheet: Table S6
Table S6: Gene ontologies enriched in 4 h free GSNO and GNP-exposed cells transcriptome (Cluster 4)
Category	Gene ontology (GO)	GO ID	Total	Changed	%	P-value	FDR (Changed)	Enrichment
blood coagulation	negative regulation of blood coagulation	30195	34	15	44.1176	0	0,0018	2.92842
	negative regulation of hemostasis	1900047	34	15	44.1176	0	0,0018	2.92842
	negative regulation of coagulation	50819	37	16	43.2432	0	0,0021	2.87038
	platelet alpha granule	31091	61	23	37.7049	0	0,0022	2.50276
	regulation of blood coagulation	30193	60	21	35	0.0001	0,0042	2.32321
	regulation of hemostasis	1900046	60	21	35	0.0001	0,0042	2.32321
	regulation of coagulation	50818	65	22	33.8462	0.0001	0,0044	2.24662
	platelet alpha granule lumen	31093	48	17	35.4167	0.0004	0,0104	2.35087
	heparin binding	8201	93	26	27.957	0,001	0,0236	1.85572
	fibrinolysis	42730	19	9	47.3684	0.0009	0,0239	3.1442
	regulation of wound healing	61041	89	24	26.9663	0,0026	0,047	1.78996
metabolic process	vitamin D metabolic process	42359	20	11	55	0	0,002	3.65077
	positive regulation of oxidoreductase activity	51353	35	16	45.7143	0	0,002	3.0344
	steroid metabolic process	8202	258	65	25.1938	0	0,0022	1.6723
	fat-soluble vitamin metabolic process	6775	42	15	35.7143	0.0008	0,0238	2.37063
	transmembrane receptor protein tyrosine kinase activity	4714	61	19	31.1475	0,0011	0,0261	2.0675
	regulation of calcidiol 1-monooxygenase activity	60558	7	5	71.4286	0,0012	0,0292	4.74125
	xenobiotic metabolic process	6805	151	37	24.5033	0,0015	0,0333	1.62647
	regulation of steroid biosynthetic process	50810	59	18	30.5085	0,002	0,034	2.02508
	nitric oxide biosynthetic process	6809	58	18	31.0345	0,0016	0,0347	2.05999
	cellular biogenic amine catabolic process	42402	21	9	42.8571	0,0021	0,0359	2.84475
	regulation of inositol phosphate biosynthetic process	10919	11	6	54.5455	0,0027	0,0498	3.62059
immune response	cytokine activity	5125	106	38	35.8491	0	0	2.37957
	cytokine receptor binding	5126	189	51	26.9841	0	0,0021	1.79114
	chemokine receptor binding	42379	44	16	36.3636	0.0004	0,0126	2.41373
	chemokine activity	8009	32	13	40.625	0.0004	0,0127	2.69659
	negative regulation of cytokine production involved in immune response	2719	12	7	58.3333	0.0007	0,0233	3.87202
	negative regulation of production of molecular mediator of immune response	2701	13	7	53.8462	0,0013	0,0306	3.57418
	regulation of production of molecular mediator of immune response	2700	85	24	28.2353	0,0013	0,0306	1.87419
	negative regulation of immune response	50777	73	21	28.7671	0,002	0,0339	1.90949
	encapsulation of foreign target	35010	11	6	54.5455	0,0027	0,0498	3.62059
developmental process	dendrite development	16358	196	47	23.9796	0.0006	0,0198	1.59171
	vasculogenesis	1570	100	28	28	0.0006	0,0201	1.85857
	forebrain generation of neurons	21872	60	19	31.6667	0.0009	0,0237	2.10196
	salivary gland development	7431	98	27	27.551	0,001	0,0237	1.82877
	gland morphogenesis	22612	162	39	24.0741	0,0016	0,0347	1.59798
	salivary gland morphogenesis	7435	78	22	28.2051	0,0021	0,0356	1.87219
	regulation of epidermis development	45682	46	15	32.6087	0,0022	0,0378	2.16449
	negative regulation of cell development	10721	160	38	23.75	0,0024	0,0475	1.57647
developmental process involved in reproduction	development of primary male sexual characteristics	46546	156	43	27.5641	0	0,002	1.82964
	male sex differentiation	46661	165	45	27.2727	0	0,0023	1.8103
	development of primary sexual characteristics	45137	275	66	24	0.0001	0,0023	1.59306
	sex differentiation	7548	313	73	23.3227	0.0001	0,0027	1.5481
	male gonad development	8584	130	34	26.1538	0.0007	0,0232	1.73603
	prostate glandular acinus development	60525	12	7	58.3333	0.0007	0,0233	3.87202
	genitalia development	48806	68	20	29.4118	0,0019	0,0349	1.95228
cell proliferation	muscle cell proliferation	33002	145	42	28.9655	0	0,0021	1.92266
	regulation of smooth muscle cell proliferation	48660	100	30	30	0.0001	0,0042	1.99133
	smooth muscle cell proliferation	48659	103	30	29.1262	0.0002	0,0058	1.93333
	epithelial cell proliferation	50673	300	68	22.6667	0.0003	0,0079	1.50456
	stem cell proliferation	72089	153	38	24.8366	0,001	0,0237	1.64859
	neuroblast proliferation	7405	75	22	29.3333	0,0012	0,0261	1.94707
	positive regulation of cardiac muscle cell proliferation	60045	20	9	45	0,0014	0,0313	2.98699
cell differentation	forebrain neuron differentiation	21879	51	18	35.2941	0.0003	0,0082	2.34274
	regulation of hematopoietic progenitor cell differentiation	1901532	7	5	71.4286	0,0012	0,0292	4.74125
	regulation of macrophage derived foam cell differentiation	10743	20	9	45	0,0014	0,0313	2.98699
	regulation of pro-B cell differentiation	2000973	5	4	80	0,0023	0,0472	5.3102
regulation of cell communication	calcium-mediated signaling	19722	105	31	29.5238	0.0001	0,0045	1.95972
	regulation of synaptic transmission, dopaminergic	32225	12	7	58.3333	0.0007	0,0233	3.87202
	regulation of calcium-mediated signaling	50848	38	14	36.8421	0.0008	0,0238	2.44549
	synaptic transmission, dopaminergic	1963	24	10	41.6667	0,0015	0,0335	2.76573
	regulation of neuronal synaptic plasticity	48168	60	18	30	0,0024	0,0472	1.99133
regulation of transmembrane transport	regulation of membrane repolarization	60306	14	8	57.1429	0.0003	0,0112	3.793
	sodium channel complex	34706	13	7	53.8462	0,0013	0,0306	3.57418
	regulation of potassium ion transport	43266	44	15	34.0909	0,0013	0,0307	2.26287
	regulation of ventricular cardiac muscle cell membrane repolarization	60307	10	6	60	0,0014	0,0331	3.98265
	negative regulation of potassium ion transport	43267	14	7	50	0,0023	0,0397	3.31888
cell adhesion	regulation of cell adhesion	30155	311	75	24.1158	0	0,002	1.60074
	positive regulation of heterotypic cell-cell adhesion	34116	5	5	100	0.0001	0,0041	6.63776
	regulation of cell-cell adhesion involved in gastrulation	70587	11	7	63.6364	0.0003	0,0103	4.22403
	regulation of heterotypic cell-cell adhesion	34114	11	7	63.6364	0.0003	0,0103	4.22403
	cell-cell adhesion involved in gastrulation	70586	15	8	53.3333	0.0006	0,0202	3.54014
axon	axon part	33267	191	57	29.8429	0	0	1.9809
	node of Ranvier	33268	16	9	56.25	0.0002	0,0048	3.73374
	axon terminus	43679	106	30	28.3019	0.0003	0,0103	1.87861
	main axon	44304	58	19	32.7586	0.0006	0,0184	2.17444
	axon initial segment	43194	11	6	54.5455	0,0027	0,0498	3.62059
cellular response to stimulus	negative regulation of response to external stimulus	32102	148	40	27.027	0.0001	0,0045	1.79399
	cellular response to alkaloid	71312	28	12	42.8571	0.0004	0,0107	2.84475
	estrogen receptor activity	30284	5	4	80	0,0023	0,0472	5.3102
	G-protein coupled amine receptor activity	8227	38	13	34.2105	0,0027	0,0473	2.27081
plasma membrane	external side of plasma membrane	9897	235	59	25.1064	0	0,0022	1.6665
	axonemal dynein complex assembly	70286	11	7	63.6364	0.0003	0,0103	4.22403
	dendritic spine membrane	32591	5	4	80	0,0023	0,0472	5.3102
protein binding	growth factor activity	8083	81	26	32.0988	0.0001	0,0044	2.13064
	receptor serine/threonine kinase binding	33612	18	9	50	0.0005	0,018	3.31888
	transmembrane receptor protein serine/threonine kinase binding	70696	14	7	50	0,0023	0,0397	3.31888
apoptosis	muscle cell apoptotic process	10657	46	16	34.7826	0.0007	0,0236	2.30878
	regulation of muscle cell apoptotic process	10660	40	14	35	0,0014	0,0336	2.32321
	cytoplasmic membrane-bounded vesicle lumen	60205	74	25	33.7838	0	0,0018	2.24248
	vesicle lumen	31983	76	25	32.8947	0.0001	0,0036	2.18347
	secretory granule lumen	34774	61	21	34.4262	0.0001	0,0043	2.28513
	oxygen binding	19825	26	12	46.1538	0.0002	0,0044	3.06358
	terminal bouton	43195	63	21	33.3333	0.0002	0,0062	2.21259
	filopodium	30175	66	21	31.8182	0.0005	0,0132	2.11201
	ligand-activated sequence-specific DNA binding RNA polymerase II transcription factor activity	4879	41	15	36.5854	0.0006	0,0186	2.42845
	positive regulation of neurotransmitter transport	51590	11	6	54.5455	0,0027	0,0498	3.62059

## Sheet: Table S7
Table S7: Full list of genes of Cluster 0 which is activated after exposure to free GSNO for 4 h or GNP for 24 h.
5566 genes
PRIMA1
ENST00000483242
SNX13
XLOC_002514
CAPN13
ILVBL
CMTM1
DDX56
ZNF587
PLIN3
C5orf42
FAM69B
L2HGDH
CHAF1B
LOC729088
TRIM5
MTL5
PDIA5
AKR1C1
CPLX3
LOC202181
C1orf106
PABPN1
A_33_P3247210
NPY6R
SH3D21
PIGP
VWA5A
PRPSAP1
ANXA3
LRRC41
ELP4
XLOC_001001
AY328032
PTPRN2
AKAP4
FUT10
EEF1E1
NPIP
GPR135
LOC100129399
ENST00000447623
LOC100505687
ACYP2
MAGEE2
LOXL3
LILRB3
A_33_P3354191
INO80B
XLOC_012810
PHB
LOC283112
C19orf50
ZNF682
XLOC_014107
ZNF773
CCT7
ENST00000437568
TNFRSF19
CHD6
A_33_P3300179
PRPF31
PHEX
C19orf68
PILRB
EXOSC2
XLOC_l2_015438
KLHDC8B
ARFGEF1
HIBCH
MFSD4
C10orf91
AHI1
A_33_P3257627
AQP3
ZNF609
CAMK4
HERC2
USP21
PPHLN1
CCDC88C
ZNF565
XLOC_005876
HABP2
RAI2
TAF1
C17orf51
XLOC_l2_011636
CXCR6
ZNF337
MLX
XLOC_012077
STS
ARHGEF25
HOXA6
A_33_P3277679
CAPRIN2
MEAF6
SEC62
PSMC3
PEAK1
XLOC_014105
STMN3
XLOC_009971
RXFP2
LOC100506990
SPIN3
C9orf117
TAF1
FAM163A
RHCG
TAF1
C2orf55
XLOC_011535
THC2541884
C7orf54
LOC100506942
M69012
KIRREL3
PIWIL2
XLOC_l2_015205
TARM1
LOC100506048
ASAP3
XKR3
ENST00000390458
CLCN6
AQP3
NR1I3
LOC100133315
A_33_P3294440
PABPN1L
DMD
XLOC_l2_009469
WFDC6
XLOC_l2_006025
XLOC_l2_007167
XLOC_005549
JAKMIP2
AB529257
UBE2L3
TCERG1L
ZNF343
DEFA3
HEPN1
XLOC_000977
PRKG1
SPN
A_33_P3417464
OR52E8
DERL1
TNXB
PTGR1
TFDP3
SYNE2
FBXL19-AS1
XLOC_002042
ENST00000391366
ZNF69
POU3F3
EBF1
RNF216
TAF1
SORBS1
MGC39584
TMEM139
NP283820
A_33_P3216267
ZNF747
EPB41L4A
XLOC_005464
CDC14B
THC2555583
LOC100132859
XLOC_005088
OTUD5
P4HA2
LOC100131691
ENST00000443196
XLOC_011149
ARL6
XLOC_002621
SLC9A1
PNMA6A
XLOC_l2_003674
COL4A1
CNN1
LOC100132273
LOC100132439
DCAKD
XLOC_l2_012173
AIDA
OR4F29
XLOC_004366
GUSBP10
TSIX
ENST00000390361
ZNF221
ENST00000449697
ANKRD20A8P
GIMAP4
SHROOM1
LOC100287314
ENTPD5
DNAL4
ENST00000383418
KSR1
SPAG11B
REM1
WWOX
XLOC_000683
ENST00000485364
XLOC_010679
ENST00000400512
CACNA1C
RGS3
LOC100507259
XLOC_010683
GGCT
TFDP3
XLOC_008727
CDK15
USP6
NXN
WDSUB1
AK058117
ITSN1
XLOC_002022
XLOC_l2_013577
LOC100506748
DUX4L4
LOC100129917
TAF1
TUBGCP5
USP12
P51957
LOC100124692
SYT12
XLOC_008370
PTPRR
TAF1
XLOC_001989
A_32_P153979
WDSUB1
ENST00000514376
MEIS3
A_33_P3385912
LOC100129083
SYNGAP1
LOC100130954
XLOC_014105
XLOC_014389
TTC1
TFDP3
XLOC_l2_001826
PAGE2B
BET3L
XLOC_l2_001359
XLOC_l2_006675
PTPRC
XLOC_011305
CTAGE4
RHBDD3
MZB1
HRASLS2
BK250D10.8
GDF3
LOC100131840
XLOC_l2_000399
XLOC_009727
ZNF565
AKAP12
A_33_P3225983
XLOC_006283
ENST00000556386
GRID2
XLOC_007577
MACROD2
XLOC_l2_007610
C1orf146
NRAP
SNORA49
GNAS-AS1
CFTR
ZNF565
DHX9
CLEC6A
GSTM2
XLOC_l2_010816
FAM71B
CYB5D1
LOC100133612
MAP1B
XLOC_l2_008259
PGM5
XLOC_011359
THC2723408
XLOC_l2_015855
LUC7L3
ASCL3
LOC100505594
XLOC_007182
CD37
OR51L1
XLOC_003427
LOC644100
XLOC_012878
XLOC_l2_013465
LOC645262
PRRG2
XLOC_006107
A_33_P3281224
DDX31
AK023831
INMT
SPG20OS
XLOC_l2_013267
CNTN1
LINC00371
CELA3A
ABCC2
XLOC_002701
PITPNC1
XLOC_l2_001960
ZNF565
XLOC_004420
XLOC_007884
LOC100507071
XLOC_006043
SNORA66
XLOC_000766
ENST00000444919
XLOC_005502
MEIS1
RPS6KA6
CCNT1
GUCA1B
XLOC_004636
LOC100132111
C4orf45
XLOC_002968
ZNF565
XLOC_l2_009500
LOC100128239
LOC440297
MITF
XLOC_001823
XLOC_013639
XLOC_010009
ZMYND19
LOC100131096
SLCO1A2
USP2
HEPACAM
TMEM196
XLOC_001637
RSPH4A
PLA2G2E
XLOC_013804
XLOC_l2_014423
LOC151658
ZNF565
SNORA38B
AAA1
ZNF23
XLOC_013542
ADAM18
LOC100506978
C4orf22
XLOC_003937
C10orf128
XLOC_010669
EIF2B1
XLOC_007234
XLOC_l2_013875
LOC100506013
CYTL1
XLOC_l2_015041
TPST2
XLOC_008207
IDO1
RNF20
CR604707
SNX30
FAM86B1
XLOC_009108
A_33_P3316261
EPN2
KCNQ5
DMRTC2
MNT
CCND1
NEK4
XLOC_l2_001085
XLOC_007248
A_33_P3344297
XLOC_008985
ERCC3
XLOC_004392
MLLT4
INPP4B
MYZAP
CUL1
XLOC_003775
XLOC_013906
NHLH1
THC2629885
CROCC
GRAP
LEPR
LRRC42
CTAGE10P
TAF1
XLOC_001107
CXorf23
EIF2B1
ENST00000556583
LOC100505679
XLOC_008406
XLOC_009859
OR5B3
XLOC_l2_009658
ANKRD20A4
TAF1
SLC9B2
GPR174
XLOC_l2_000401
ATXN7L1
C2orf49
XLOC_000830
A_33_P3391120
TREM1
SAT1
SCRT1
A_33_P3315986
A_33_P3279181
TUSC5
ACPP
XLOC_004300
XLOC_l2_010461
RNF157
ARHGEF35
BG192243
RNF180
ZIM3
NAIP
PICALM
ACIN1
SORD
THOC2
CPT1A
EIF4G3
KHSRP
PREP
ENTPD4
AMD1
AK4
C12orf11
PPP2R2A
NCOA4
SUMF2
C9orf47
SBDS
THRAP3
OTUD6B
AB385295
ACACA
DNAJC27
RBAK
KLF4
PABPC4
TGOLN2
ABL2
XLOC_l2_015177
PHF14
XLOC_l2_002651
HNRNPUL2
SF3B2
PDCD6IP
COQ10B
RFPL3-AS1
CDK2
HSP90B3P
A_33_P3334738
FOXO3
BCL2L13
COL22A1
DTX2P1-UPK3BP1-PMS2P11
XLOC_000478
CACYBP
SETD5
FOXK2
NFIX
CDK8
EXOC8
C19orf22
ARF1
ATP2B4
XLOC_l2_014048
TFDP1
LOC286109
XLOC_013905
LOC653712
CENPO
HEATR7A
ISCA1
CHIC1
GPATCH1
MDM4
MPV17L
PRDM2
PRKCD
RBFOX2
SMCHD1
KCNC4
SENP3
HNRNPK
CKAP2
SMC1A
LOC100652810
MTRNR2L2
SYNCRIP
XRRA1
XLOC_l2_005245
ANKHD1
PRRC1
ARHGEF2
XLOC_003839
CLASP2
MBTPS2
RPPH1
SRRM2
SNRPN
PSMA5
TMED9
XLOC_l2_008546
LDHA
EIF3K
LOC401074
POLR3G
NIPAL2
CCNL1
PHF12
LOC731282
WDR67
YWHAQ
BCAT1
HERC2
CHEK2
MARC2
DYRK1A
TLE4
ANKRD36BP2
CEP120
RPS16P5
LCLAT1
CBFA2T2
ZNF730
CCZ1
PECAM1
MAX
SLC25A11
PEF1
XLOC_005552
CTPS2
TXLNG
SH3BP2
NUDT21
TLK2
XLOC_010037
ZNF146
AKAP9
FOXP2
KDELC2
TMCO4
FAM118A
CLPX
CDK13
FANCA
LOC389834
TMEM164
KLF6
CDV3
A_33_P3251663
POMZP3
SNORD116-29
MAPK6
PATL1
SIGMAR1
SLC39A6
XLOC_l2_015773
TAPBP
NR4A2
C1orf43
TBC1D22A
FOS
ZNF814
TRIM4
CNN2
XLOC_004640
IPW
ATP5C1
CTBP2
AP4M1
PPP2R2A
ANXA10
XLOC_l2_005020
TAF3
FOXP1
LOC100506023
C9orf102
BNIP3L
ENST00000358739
INTS4L2
PSMD6
LPCAT2
TMED10
CSDA
METTL2B
SLC16A7
CDK2
TERC
XLOC_l2_013873
EPT1
PRDM13
MBTPS2
CLIC4
PEX5L
SNORD90
LOC100132077
MLL
AGAP1
SRP9
GGA1
ME3
DNAJC5
ZNF451
XLOC_l2_015295
MED1
APPL2
TMSB4Y
KIF13B
CLEC2D
ORC2
WDSUB1
TMCO3
CD99P1
SNORD27
XLOC_l2_004596
A_33_P3248077
IPW
OTX1
C17orf88
HERC2
LOC100509075
LOC541471
GSG2
PARP4
FAM45A
XLOC_000197
XLOC_l2_003156
XLOC_l2_007401
POTEM
GOLGA8IP
HIP1
EIF4EBP1
LOC100133331
SUMF2
PTPRG
CDV3
FAM171B
KCNAB2
CPT1A
SMYD3
AFG3L1P
ZCWPW1
INE1
ENSA
SHOX2
A_33_P3265249
NBPF6
LOC441455
PLAGL2
EIF2C3
NUDC
PPM1K
Q8RQM5
MBTPS2
LOC100128477
CPT1A
LOC100287765
RBM33
ZNF146
GLYR1
WDFY1
SNORA6
XLOC_l2_010528
XLOC_000071
HIPK1
GALT
ZNF767
MCFD2
VDAC1
LOC100131066
LOC100132167
OBFC2B
BRCA2
PPM1A
ARL11
TFRC
XLOC_009713
MLL
ANKRD18B
STEAP2
ATF7IP
PANK3
TMEM87A
EIF2D
RAD51D
ADPGK
BRWD3
AQP3
POLE
RAI14
ANKLE2
FAM118A
ENST00000457671
KCNC3
ATRN
XLOC_009712
DTX2P1-UPK3BP1-PMS2P11
HCG18
NF1P2
MDM4
DISC1
XLOC_l2_007433
LOC100129186
IL18BP
ZNF684
ZSWIM6
ZNF746
GRPEL2
MPP1
APOA1BP
HSP90AA2
A_33_P3395403
ANAPC1
HDGF
ENST00000457049
HMP19
ACTR1B
PARP4
MIPEP
ZBED4
MLL5
KIAA0090
SNORD116-27
WDR73
GOLGA6L10
FAM133B
PHACTR3
MAP7D3
OSBPL9
ABCE1
SON
AJ276252
RAPGEF6
TMEM43
MBTPS2
SLC16A8
RPL6
C6orf211
THC2671740
VEGFA
SRSF2
LOC100131434
LOC100508233
NSF
THC2641895
IDH3B
LTA4H
FAM207A
LENG1
RAB28
ZNF267
ATP8B2
ATP5B
A_33_P3301445
MUM1
ME3
C15orf38
Q8RQM5
2014-09-01
XLOC_l2_014827
SNORD49A
CPT1A
PLA2G12A
CDC40
P39194
CEP128
FAM102B
TOR1AIP1
SPIRE1
RBM47
PPP4C
M6PR
COG4
PSME1
MYH9
ZNF670
ZNF519
C6orf170
XLOC_006588
A_33_P3381429
SRRT
HM13
PARK2
SET
DPY19L3
MBTPS2
GOLGA8IP
PIP4K2A
RBM15
ETS1
LOC100130417
HNRNPA1L2
SNORA11D
XLOC_003588
XLOC_000397
FAM21C
PTPRC
2014-09-01
RNF115
A_33_P3392097
KIF5B
CDK5RAP2
RALGPS2
NOB1
PCDH10
MLL
CBWD5
LAMP2
TFRC
DMTF1
PPP1R26
ZNF701
PCDHAC2
PRKAR2A
XLOC_000337
MTMR10
PYGO1
CDK4
RSF1
PDE7A
ULBP3
RPS6KB1
SCARNA5
TRNT1
ZNF253
STARD13
HSP90AA1
TLK2
ZNF507
XLOC_008559
EIF2D
ANTXR2
BRWD1
ALDH8A1
TRIM14
PLEKHB2
RTN3
TAF4B
NBPF10
PLAU
BCL2L11
FOXP2
PPFIBP1
RPL36AP33
WASF1
THC2512536
TSPYL5
ENST00000534866
CNOT4
ARCN1
RUNX1
PCSK6
ZNF207
XLOC_002085
CCNE2
XLOC_l2_000421
RAB30
CASP3
NMT2
HNRNPAB
XLOC_l2_013931
ADAMTS7
FAM106CP
ZBED6
CNST
SNORA80
TMEM43
TBC1D22A
ENST00000356370
PLIN3
C1orf201
UBE2Q2P1
ME3
APBB1IP
XLOC_014110
FBXO48
CPT1A
CCDC144A
AK022213
HMGN4
HIST1H2AK
MTMR8
ABHD3
HIST1H1E
LOC100132396
KDM1A
FGF7
ZNFX1
GGA1
CD84
SNORD88C
FAM118A
CPT1A
AQPEP
CCNG1
A_33_P3389926
WDR85
MAGEA2B
MAT2A
TMEM232
ZNF585B
XLOC_007916
LOC100506636
TPCN1
SCP2
PPP2R2A
XLOC_l2_004605
CTPS2
C1orf43
SETD2
ENST00000506859
XLOC_012294
XLOC_005071
CDYL
PPP2R2A
XLOC_l2_011854
RAB38
LOC100294145
PEX26
ENST00000529822
ZNF684
GOLGA8IP
WIPF1
FKTN
XLOC_000502
MTRNR2L2
DCAF8
PIK3R1
LOC100499484
KLHL23
TYW1
APPL2
A_33_P3264533
XLOC_l2_001238
PAEP
GNA11
NP1207855
ENST00000356801
XLOC_l2_014579
FLJ26850
XLOC_l2_014802
HKR1
SCAND2
SNRPD3
LOC100132234
LOC100506201
COL27A1
TFRC
TUG1
XLOC_005572
XLOC_002406
FIGLA
PNRC2
DNM1L
AGAP7
SYT5
AKAP9
A_33_P3406547
H3F3B
ZNF331
XLOC_l2_013873
XLOC_003907
DIDO1
HK2
CCDC64
XLOC_005217
XLOC_l2_005438
DCTN5
APH1A
SCARNA13
MIER1
PPP1R2
MON2
IDS
XLOC_l2_010558
AW503309
GOLGA7
CXorf56
SRY
RPL15
XLOC_l2_008802
A_33_P3318227
OR2G6
FAM19A2
MB21D1
COQ2
ITSN2
RNF213
KIF21A
OTUD6B
ME3
SPAG9
ENST00000506053
IMMT
CCL3L3
PPM1D
SNORD7
ENST00000465474
XLOC_l2_014061
SRSF10
CELF2
PTAR1
ENST00000371162
WDR45
TTC17
XLOC_011436
XLOC_012830
XLOC_l2_000384
XLOC_004754
ENST00000544589
ASB11
ITGA4
OSBPL3
LOC100652887
WDR73
DEFA10P
DSCAML1
MAPK9
HIST1H4J
HCG18
LDLRAD3
HCG27
XLOC_l2_010558
EME2
PHF8
WWP2
SNORD19
SNORA36A
NF1
MCFD2
XLOC_004839
LOC100130248
MAPK1IP1L
FLJ25694
XLOC_001699
ENST00000437095
PDZD8
XLOC_003652
BCOR
HDAC8
C1D
LOC100132966
LINC00265
PLAA
LOC728218
NEK4
LUC7L
RPS6KB1
NPHP3
FUS
ZEB2
LTN1
HIST1H2AL
C10orf53
CAB39
ZCCHC11
PACSIN2
TTC14
BOD1L
CEP350
ZHX3
ENKUR
APPL2
LOC100506190
DEPDC5
XLOC_l2_004594
SF3B1
UBE3B
LEPRE1
YBX1
DDA1
KIAA1598
ZNF382
C3orf37
CCDC144A
THC2788944
XLOC_010855
MUC19
WDFY4
TBL1XR1
NBPF15
FAM66C
HTRA3
CD55
KCTD9
ENST00000359193
LY6G5B
A_33_P3334043
WWOX
MUC19
NT5C2
UBE2Q2P1
ARCN1
MLLT4
STXBP5
OR7E37P
MBTD1
SUMF2
INPP1
RRBP1
LOC284837
THC2496594
TFG
C5orf42
CDKAL1
ZNF121
ASCC2
RFX8
RCC1
EMB
C17orf80
CA5BP1
KRT72
MBTPS2
MLL3
ANKRD20A5P
RAI1
SNORD30
FLJ43826
LOC100506668
WNT7B
UHMK1
LOC100287765
GSPT1
TWIST1
CDK2
RFC3
SMG7
A_33_P3337154
EXOC4
MTFMT
AMOTL1
MCM9
A_24_P383901
MAP2K1
CN285977
ZNF532
PRPF4B
NOTCH2NL
FOXO4
RREB1
MAK16
MYBL1
LOC100287765
CNTNAP3
RUNX2
TIFA
SNORA40
ARHGAP30
MRPS30
TP53
ZNF717
NUP98
R3HDM1
ERLIN2
XLOC_l2_004594
OTUD6B
ENST00000441217
PXK
ANKRD36B
XLOC_l2_014098
PDLIM5
ANKRD18B
KLHL15
LRRFIP1
AFF1
XLOC_005458
DPY19L2
DCAF10
LOC285626
CA5B
CTPS2
APPL2
XYLB
LARS
PMS2P5
BCL2
SDAD1
RAB19
KANSL2
SUMF2
LRRC37A3
TACC3
NRAS
TOMM70A
ROCK1
CSGALNACT2
USP45
A_24_P255845
A_32_P102252
TMED8
CDC42EP3
XLOC_l2_008203
XLOC_003284
SMC1A
GTF2H3
XIAP
XLOC_l2_000727
SMS
2003-09-01
HSP90AA1
SNORA10
MBTPS2
LOC100288842
PER2
RGPD6
LOC84856
ULBP1
XLOC_007996
ALMS1
ADD1
GON4L
2002-03-01
SSR2
INO80
IDO1
FASN
HIST1H1D
LOC100509247
SCAF4
SMG1
DNMT3A
PPME1
CDC27
A_33_P3358905
SNORA38
IL4R
ST7L
LOC100506930
KIF21A
GOLGA7
AAK1
RPS2
TMEM154
TAB2
NAALADL2
DOCK5
ATP11B
RASA1
PDE6D
MED14
NAIP
CRISPLD2
A_24_P15821
ISY1
ENST00000425591
EIF2C2
CAPZB
FAM168B
LPP
PSMD5
USP6
XLOC_009713
LOC100131654
NUS1
RABEP1
LOC100286979
BCL11A
HIST2H2BE
CASP10
LOC100133039
SNORA80B
METTL8
HUWE1
ARHGEF25
GTF2A1
HIST1H2AH
A_33_P3292218
TFRC
RANBP6
CDK13
DDX59
EXOG
CELF2
LOC100507474
ZFP62
FUBP3
LOC100505687
ZNF480
LOC100294145
TGFBR2
HYOU1
ANKRD36B
ZNF695
C6orf72
GOLM1
LOC653075
LOC100287765
CCDC134
EIF4G2
KLHL11
ZFAND5
BX538057
XLOC_006763
PAPOLA
LOC100133920
ZNF519
MIB2
ULBP2
DCTD
CDK7
EFTUD1
AF370394
LIMS3L
LOC100509487
MYB
LOC100129960
CCDC150
AK025118
IMMT
C10orf131
ZNF767
ZNF684
IPO7
NPEPPS
DCAF12
LARP4
XLOC_l2_011118
PLIN3
A_33_P3281716
A_33_P3338539
ATP11C
PPP4R2
2007-09-01
MOG
A_33_P3387062
MLLT1
TXNDC12
MDM4
ENST00000313865
STIL
CCDC149
RAB11FIP1
XLOC_l2_007433
CENPI
SBNO1
XLOC_l2_008203
APEX1
XLOC_l2_008203
HIPK2
EIF4G2
SNORA46
MDM2
ENST00000443467
LOC100507637
NHLRC2
A_33_P3372104
BRD4
RBFOX2
MIPEP
CCNA2
CDC42
MECP2
SUMF2
TAF5L
CD164
RFX3
PARP4
ZNF717
XLOC_l2_009285
TMED5
AKT3
UTP23
TAP2
LOC100130580
HERC2
LOC100130657
XLOC_007807
CIZ1
ACP1
SDHC
PECAM1
XLOC_009382
RSU1
EIF2D
PCDHGC3
HIST1H2AM
UTP23
CTPS2
SLC39A1
DIAPH1
MDM4
HERC2
ZC3H14
UTRN
IQCF5
PHF8
BE616696
ELK4
FAM118A
SUGP1
XLOC_003364
LRP11
PRPF4B
TMEM50B
ZDHHC17
XLOC_l2_013594
GABRR2
CCNA2
ZNF280D
HERC2P4
LOC100507062
LOC100506714
XLOC_007276
CNBP
RALGAPA1
YARS
LDB1
LOC285972
NAV3
SNORD1B
VPS35
ELOVL5
NOVA1
SPRY2
LOC100132832
ASPH
ERV3-1
IPW
RPS6
GPR27
XLOC_l2_001967
EIF3D
ZNF146
XLOC_002170
LOC550112
EIF4G2
CCT4
A_33_P3324687
2002-03-01
TMEM85
XLOC_l2_009292
TMEM165
FAM125A
PARP8
ENST00000492160
FBXO17
A_33_P3210069
OTUD6B
SLC9A3
RMRP
AKAP5
ADIPOR1
PTPRG
PPP1R12B
PPIP5K1
OTUD6B
LARP4B
A_33_P3381132
IDS
LRCH3
NP106737
KIAA1429
CTDNEP1
KIAA0907
XLOC_010856
XLOC_l2_010511
MAGT1
SNORA36B
XLOC_002725
RN18S1
MLLT4
KIAA0889
PRKRIR
PGM5P2
A_33_P3407626
A_33_P3416414
KAL1
A_33_P3332616
WDPCP
FLJ35024
RIMS2
E2F5
EIF2C2
PPP1R12B
FLJ45974
OSR2
DIAPH3
SERINC3
C12orf51
CD86
LOC84856
LRRC37A2
TCF25
XLOC_009249
FAM118A
UBE2Q2P1
FNDC3B
ARHGEF12
XLOC_l2_015037
A_24_P229726
MLNR
XLOC_008706
PHIP
SCARNA8
XLOC_l2_000010
CHD2
TBC1D10B
PBXIP1
XLOC_l2_010830
LOC100506390
ASPH
AUP1
XLOC_l2_013594
PCYT1A
LINC00471
SLC50A1
A_33_P3268408
MINA
THRA
SIRPB1
QKI
SPG20OS
SOCS7
ENST00000431582
CDKN1A
ENST00000373137
LOC729313
LOC440297
ACVR1C
A_33_P3407691
RABGGTB
XLOC_l2_008363
PPP2R2A
TCEA1
ENST00000445977
LOC91948
ENST00000528268
KCNK1
ICAM5
ENST00000532936
MYO5A
XLOC_012467
LRRFIP1
AF274942
ST13
METTL16
LRRC8C
LOC100131702
GPR75
FAM135A
E2F3
NEFH
ARHGEF7
SYNRG
PPP2R1A
NFIC
ZNF684
LINC00265
SNORD8
HSP90AA1
XLOC_008276
XLOC_001303
XLOC_013282
ENST00000441797
CCDC132
FAM118A
SPECC1L
PINX1
EIF2D
INF2
MCFD2
CAPZB
CDC14A
ZNF778
ZNF295
TAS2R19
CDCA7L
PTP4A1
ZBTB44
SIRPB1
ARHGEF6
CMPK1
LOC729444
PCNA
XLOC_l2_010348
XLOC_l2_011001
ZSWIM6
NAP1L4
LSM14B
CRCP
BCL2L13
XLOC_l2_000592
GTPBP6
XLOC_005521
RSL1D1
PMS2
MTX3
MIPEP
HSP90AA1
DNM1L
A_33_P3262217
PLAC4
SNORA27
A_33_P3265624
PHACTR4
ARHGEF18
AFF4
ACSBG1
SUMF2
PHF6
NAF1
AK130290
SNORD96A
LOC100128869
TSEN15
MCFD2
SNORA19
psiTPTE22
PARP1
PAFAH1B2
XLOC_l2_003021
ARPP19
KIF20B
MIPEP
CDR2
LMO7
WDR77
SNORD70
NR2C2
IL6ST
THC2773489
SRGAP2
PRR20B
EBAG9
PARP15
ZDHHC20
CCDC47
C1orf124
PPFIBP1
C6orf204
TOP1
IPCEF1
A_24_P24685
PLIN3
LPHN2
LOC100129186
A_33_P3348509
IL4R
ME3
PLEKHM1
BASP1P1
C10orf46
EIF2B1
C1orf213
ANKRD18B
UBE2V1
EIF4ENIF1
RNF148
ARHGAP23
DCBLD1
NRARP
THC2565581
SNORD82
SNORA11C
MIPEP
XLOC_l2_007287
TIAL1
DW451783
RAPGEF1
GMFB
XLOC_011326
CASS4
TSPAN14
CCL28
EIF2C2
XLOC_l2_014777
FRY
XLOC_l2_000423
XLOC_l2_015641
RBBP6
ELL
DLGAP4
ENST00000375673
SH3KBP1
CPT1A
EPHB4
IFIT2
XLOC_l2_015090
LOC100129917
TAF1
LOC100288069
A_33_P3362601
PTPLB
GART
LOC100287765
VLDLR
SHC2
APP
MRPL1
CCNA2
EML4
FAM167A
2009-09-01
KIAA1430
RPS27
LRPPRC
DDI2
KDM5C
CDCA7L
ANKRD10
LOC100653259
XLOC_003164
TLK1
XLOC_l2_014830
EFTUD1
COQ10B
FAM118A
LOC100652752
GPC6
CEP250
IARS2
GTF3C4
BU659163
LPGAT1
TENC1
MDN1
BMP2K
LOC100288069
LOC646278
ZNF146
XLOC_001048
MS4A14
PDIA6
CEP170
LOC731789
MIPEP
OTUD6B
SHMT1
THC2612433
SNORA74B
CDKL1
MDM4
TCF7
WHSC1
MEAF6
ASCC3
RFX8
MCFD2
FAM27A
NCBP1
ING5
SUV420H1
PDCD7
XLOC_014394
CD46
C4orf41
PER3
PRKAA1
USP10
OSBPL2
POLE
FUBP3
A_33_P3237835
ZNF146
SP9
LONRF2
XLOC_l2_004854
HEATR7A
TMEM183B
EIF2D
HECTD3
ME3
SH3KBP1
CELF2
LOC646329
WDR77
EIF2D
BACH1
LOC100129089
HMGB1
TXLNG2P
C17orf13
SPEN
EDEM3
SNORD42B
POLR1D
WIBG
FCHO2
CAV2
USP47
LOC728802
TACC1
PIAS1
HSP90AA1
PLEKHG2
E2F6
C1orf220
ACER3
RBBP5
FKSG29
SH3BP5
IL6ST
MAP3K4
LOC100507624
ZNF684
NR2C2
EVI2B
EFTUD1
ATF7IP
LOC389834
LOC645202
CDK2
FAM21C
ENST00000450495
XLOC_l2_015578
CATSPER2
CDC14B
LRRC37A3
TIMM23
PMS2
APPL2
XLOC_008828
C12orf51
ANKRD44
ZFC3H1
CDKN1B
NDNL2
ERVW-1
TRIM41
CAV2
MCM9
LOC643699
MXD1
XLOC_013931
PDE4DIP
CLIC1
NOB1
SIRPB1
CHTOP
XLOC_l2_013808
FAM192A
PCDHGB4
SNORD66
MYOF
SNORD96B
EPB41L2
SNORD105B
LOC100506516
XLOC_005737
HSP90AA1
TMEM69
WDR3
MBTPS2
PIKFYVE
CDK2
TAGLN2
FHL2
PHACTR2
FGFR1
CHMP4B
TADA2A
ZNF770
FAM18B2
NBPF1
HIST1H2AJ
MFSD10
C1orf63
YTHDF1
DCBLD1
ATF2
NF2
ARHGAP26
ZBTB37
CD4
SNORD93
SEPT7P2
C9orf102
ZNF318
RFX8
FAM117B
ZNF250
SEPT7P2
ANP32E
ANAPC1
SNORD64
XLOC_014139
NF1
THC2515563
RHOT1
XLOC_000468
HSP90AA1
XLOC_l2_008203
XLOC_l2_009883
ZNF326
CHD1
C2orf29
ZHX3
ZNF684
OTUD6B
LOC100505873
SIRPG
LINC00340
NIN
APPL2
FTX
NCOR1
PMS2L2
ENST00000425591
EVI5
BTF3
MCCC2
MAN1A2
CLSPN
PHKA1
CENPF
GNPDA1
TERF1
MIER3
CWC15
RPS6KB1
HMBOX1
ADARB1
CDKL1
PCSK7
DNAJC11
KIAA1598
LOC100132832
KIAA1841
UBE3A
LOC731275
CNTRL
PDIA3
FUCA2
EIF3C
SART3
ALKBH5
GOLGA6L1
HNRNPA2B1
CDK2
EIF2C2
NPTN
SMARCE1
ZNF407
ZNF131
PIBF1
CBX1
C13orf15
A_33_P3215383
ATP2B4
XLOC_l2_005874
ESYT3
RALBP1
LINC00087
SNAP23
CPT1A
ZNF594
LOC100130581
HERC2
MLX
TFRC
ODF2
MAVS
HERC2
KDSR
ARID5A
LARP1B
MBTPS2
SUMF2
YWHAZ
C16orf80
PAQR3
INHBA
ZNF778
[truncated: 3,568 more rows]

## Sheet: Table S8
Table S8: Gene ontologies enriched in 4 h free GSNO and 24 h GNP-exposed cells transcriptome (Cluster 0)
Category	Gene ontology (GO)	GO ID	Total	Changed	%	P-value	FDR (Changed)	Enrichment
cell cycle	interphase	51325	302	90	29.8013	0	0	1.89887
	G1/S transition of mitotic cell cycle	82	262	78	29.771	0	0	1.89694
	G2/M transition of mitotic cell cycle	86	172	51	29.6512	0	0	1.8893
	cell cycle phase	22403	346	102	29.4798	0	0	1.87838
	interphase of mitotic cell cycle	51329	293	86	29.3515	0	0	1.87021
	cell cycle phase transition	44770	568	153	26.9366	0	0	1.71634
	mitotic cell cycle phase transition	44772	501	134	26.7465	0	0	1.70423
	cell cycle checkpoint	75	282	73	25.8865	0	0	1.64943
	regulation of cell cycle phase transition	1901987	362	92	25.4144	0	0	1.61935
	negative regulation of cell cycle phase transition	1901988	308	78	25.3247	0	0.0004	1.61363
	negative regulation of cell cycle process	10948	352	84	23.8636	0	0.0008	1.52054
	regulation of mitotic cell cycle phase transition	1901990	286	70	24.4755	0.0001	0.0011	1.55952
	DNA integrity checkpoint	31570	195	51	26.1538	0.0001	0.0029	1.66646
	mitotic DNA integrity checkpoint	44774	133	38	28.5714	0.0001	0.0032	1.82051
	spindle organization	7051	198	50	25.2525	0.0003	0.0066	1.60903
	negative regulation of mitotic cell cycle phase transition	1901991	224	55	24.5536	0.0004	0.0068	1.5645
	regulation of G1/S transition of mitotic cell cycle	2000045	137	37	27.0073	0.0005	0.0088	1.72084
	signal transduction involved in cell cycle checkpoint	72395	68	22	32.3529	0.0005	0.0089	2.06146
	mitotic cell cycle checkpoint	7093	197	49	24.8731	0.0005	0.0097	1.58486
	negative regulation of G1/S transition of mitotic cell cycle	2000134	96	28	29.1667	0.0006	0.0103	1.85843
	signal transduction involved in mitotic cell cycle checkpoint	72413	66	21	31.8182	0.0008	0.0148	2.02738
	cell cycle arrest	7050	198	48	24.2424	0.0011	0.0196	1.54467
	positive regulation of cell cycle arrest	71158	82	24	29.2683	0.0014	0.0203	1.86491
	G2 phase	51319	7	5	71.4286	0.0015	0.0244	4.55127
	G2 phase of mitotic cell cycle	85	7	5	71.4286	0.0015	0.0244	4.55127
	DNA-dependent transcription, elongation	6354	122	32	26.2295	0.0018	0.0314	1.67128
metabolic process	mRNA metabolic process	16071	573	140	24.4328	0	0	1.5568
	succinate dehydrogenase activity	104	6	6	100	0	0.0007	6.37177
	protein phosphatase type 2A regulator activity	8601	16	10	62.5	0	0.0009	3.98236
	RNA catabolic process	6401	248	60	24.1935	0.0003	0.0063	1.54156
	transcription corepressor activity	3714	208	52	25	0.0003	0.0065	1.59294
	nuclear-transcribed mRNA catabolic process	956	205	51	24.878	0.0004	0.0078	1.58517
	methylation	32259	216	53	24.537	0.0005	0.0089	1.56344
	tricarboxylic acid cycle	6099	28	12	42.8571	0.0006	0.0099	2.73076
	translation initiation factor activity	3743	41	15	36.5854	0.0009	0.0179	2.33114
	macromolecule methylation	43414	197	48	24.3655	0.001	0.0187	1.55251
	phosphatase regulator activity	19208	58	19	32.7586	0.001	0.0188	2.0873
	mRNA catabolic process	6402	219	52	23.7443	0.0011	0.0192	1.51293
	uridylyltransferase activity	70569	7	5	71.4286	0.0015	0.0244	4.55127
	purine nucleobase metabolic process	6144	43	15	34.8837	0.0016	0.0245	2.22271
	proteasome accessory complex	22624	27	11	40.7407	0.0016	0.0246	2.59591
	protein phosphatase regulator activity	19888	48	16	33.3333	0.0019	0.0318	2.12392
	peptidyl-threonine phosphorylation	18107	62	19	30.6452	0.0023	0.0346	1.95264
	protein deacylation	35601	63	19	30.1587	0.0028	0.0445	1.92165
	nucleotide-sugar metabolic process	9225	33	12	36.3636	0.0031	0.0492	2.31701
cytoskeleton organization	centrosome	5813	413	100	24.2131	0	0	1.5428
	microtubule cytoskeleton organization	226	462	110	23.8095	0	0	1.51709
	negative regulation of cytoskeleton organization	51494	85	26	30.5882	0.0004	0.0079	1.94901
	centrosome cycle	7098	93	27	29.0323	0.0008	0.0137	1.84987
	centrosome organization	51297	124	33	26.6129	0.0012	0.0199	1.69571
	microtubule organizing center organization	31023	139	36	25.8993	0.0013	0.0199	1.65024
	astral microtubule organization	30953	7	5	71.4286	0.0015	0.0244	4.55127
	negative regulation of actin filament polymerization	30837	31	12	38.7097	0.0016	0.0249	2.46649
	centrosome duplication	51298	76	22	28.9474	0.0024	0.0356	1.84446
	regulation of microtubule-based process	32886	125	32	25.6	0.0028	0.044	1.63117
chromosome organization	nucleosome positioning	16584	8	7	87.5	0	0.0007	5.5753
	DNA conformation change	71103	165	46	27.8788	0	0.0008	1.77637
	chromatin assembly or disassembly	6333	99	30	30.303	0.0002	0.0045	1.93084
	chromatin assembly	31497	70	22	31.4286	0.0007	0.0133	2.00256
	chromosome, centromeric region	775	138	36	26.087	0.0011	0.0195	1.6622
	chromatin remodeling at centromere	31055	25	10	40	0.003	0.0487	2.54871
	histone deacetylation	16575	50	16	32	0.0031	0.0493	2.03897
cell differentation	negative regulation of osteoclast differentiation	45671	19	11	57.8947	0	0.0009	3.68892
	negative regulation of myeloid leukocyte differentiation	2762	36	14	38.8889	0.0007	0.0121	2.47791
	erythrocyte differentiation	30218	117	32	27.3504	0.0009	0.0168	1.74271
cellular homeostasis	regulation of cellular pH	30641	47	16	34.0426	0.0015	0.0231	2.16911
	regulation of intracellular pH	51453	44	15	34.0909	0.002	0.0319	2.1722
	erythrocyte homeostasis	34101	125	32	25.6	0.0028	0.044	1.63117
nucleotide binding	ribosome binding	43022	34	15	44.1176	0.0001	0.0011	2.81108
	deoxyribonucleotide binding	32552	7	5	71.4286	0.0015	0.0244	4.55127
	adenyl deoxyribonucleotide binding	32558	5	4	80	0.0026	0.0421	5.09742
nucleus part	nucleus localization	51647	44	20	45.4545	0	0	2.89626
	establishment of nucleus localization	40023	33	14	42.4242	0.0002	0.0055	2.70318
	nuclear migration	7097	24	10	41.6667	0.0021	0.0322	2.65491
protein binding	transcription factor binding	8134	466	112	24.0343	0	0	1.53141
	protein phosphatase 2A binding	51721	19	11	57.8947	0	0.0009	3.68892
	peroxisome proliferator activated receptor binding	42975	14	8	57.1429	0.0004	0.009	3.64101
immune response	Fc receptor signaling pathway	38093	217	53	24.424	0.0005	0.0098	1.55624
	Fc-epsilon receptor signaling pathway	38095	166	40	24.0964	0.003	0.0486	1.53537
	negative regulation of protein complex assembly	31333	69	23	33.3333	0.0002	0.0051	2.12392
	signal transduction involved in DNA damage checkpoint	72422	67	22	32.8358	0.0004	0.0076	2.09222
	signal transduction involved in DNA integrity checkpoint	72401	67	22	32.8358	0.0004	0.0076	2.09222
	ribosome assembly	42255	35	14	40	0.0005	0.0088	2.54871
	negative regulation of homotypic cell-cell adhesion	34111	6	5	83.3333	0.0005	0.0095	5.30981
	positive regulation of translation	45727	61	20	32.7869	0.0007	0.0125	2.08911
	negative regulation of protein depolymerization	1901880	49	17	34.6939	0.0008	0.0163	2.21061
	cellular senescence	90398	33	13	39.3939	0.0009	0.0169	2.51009
	negative regulation of protein complex disassembly	43242	53	17	32.0755	0.0022	0.0338	2.04378

## Sheet: Table S9
Table S9: Full list of up- and down-regulated genes following 4 h-exposure to 1.4 µM of free GSNO which at least 1.5-Fold Change and p ≤ 0.001.
Genes UP 382			Genes DOWN 216
Gene symbol	Gene Name	Fold Change	Gene symbol	Gene Name	Fold Change
RN28S1	RNA, 28S Ribosomal 5	5.77199	C14orf162	Chromosome 14 Open Reading Frame 162	-4.95966
HIST1H2AL	histone cluster 1 H2A family member l(HIST1H2AL)	4.69362	XLOC_l2_015938	unknown	-4.44535
SNORD3B-1	small nucleolar RNA, C/D box 3B-1(SNORD3B-1)	4.5108	XLOC_l2_007656	unknown	-3.58253
TINAGL1	tubulointerstitial nephritis antigen like 1(TINAGL1)	3.27164	RORB	RAR related orphan receptor B(RORB)	-2.7517
A_33_P3322192	unknown	3.24973	ZHX1	zinc fingers and homeoboxes 1(ZHX1)	-2.7106
RN5-8S1	RNA, 5.8S Ribosomal 5	2.84765	THC2540172	unknown	-2.62259
SH2D5	SH2 domain containing 5(SH2D5)	2.75125	PYY2	peptide YY 2 (pseudogene)(PYY2)	-2.60919
XLOC_002702	unknown	2.667	A_33_P3257944	unknown	-2.60514
MRGPRG	MAS related GPR family member G(MRGPRG)	2.66455	XLOC_l2_007876	unknown	-2.5969
LOC100129447	uncharacterized LOC100129447(LOC100129447)	2.65424	THC2554858	unknown	-2.47828
XLOC_008559	uncharacterized LOC105378427(XLOC_008559)	2.65239	XLOC_002730	unknown	-2.42485
XLOC_000495	unknown	2.63573	FPGT	fucose-1-phosphate guanylyltransferase(FPGT)	-2.39615
AAK1	AP2 associated kinase 1(AAK1)	2.60618	COTL1	coactosin like F-actin binding protein 1(COTL1)	-2.38451
HIST1H4J	histone cluster 1 H4 family member j(HIST1H4J)	2.5769	NRIP1	nuclear receptor interacting protein 1(NRIP1)	-2.37134
THC2686826	unknown	2.52546	SNRPD2P2	small nuclear ribonucleoprotein D2 pseudogene 2(SNRPD2P2)	-2.34717
PTPN11	protein tyrosine phosphatase, non-receptor type 11(PTPN11)	2.51594	RRM2B	ribonucleotide reductase regulatory TP53 inducible subunit M2B(RRM2B)	-2.27591
A_24_P358305	unknown	2.45407	PDIA4	protein disulfide isomerase family A member 4(PDIA4)	-2.25301
PSMD2	proteasome 26S subunit, non-ATPase 2(PSMD2)	2.4537	FAM178A	Family With Sequence Similarity 178, Member A	-2.18835
MALAT1	metastasis associated lung adenocarcinoma transcript 1 (non-protein coding)(MALAT1)	2.40118	UBTD2	ubiquitin domain containing 2(UBTD2)	-2.16313
DDX24	DEAD-box helicase 24(DDX24)	2.37839	XLOC_l2_007147	unknown	-2.08949
ATP1A4	ATPase Na+/K+ transporting subunit alpha 4(ATP1A4)	2.33843	PAK2	p21 (RAC1) activated kinase 2(PAK2)	-2.06564
CD674525	unknown	2.32401	DR1	down-regulator of transcription 1(DR1)	-2.03544
SLC3A2	solute carrier family 3 member 2(SLC3A2)	2.31407	SRPK2	SRSF protein kinase 2(SRPK2)	-2.01519
POTEF	POTE ankyrin domain family member F(POTEF)	2.30256	PLA2G4A	phospholipase A2 group IVA(PLA2G4A)	-2.01358
XLOC_l2_006025	unknown	2.29632	MOB1B	MOB kinase activator 1B(MOB1B)	-2.00402
XLOC_012142	unknown	2.2894	A_33_P3364498	unknown	-1.9981
ETFA	electron transfer flavoprotein alpha subunit(ETFA)	2.2827	CSNK1A1L	casein kinase 1 alpha 1 like(CSNK1A1L)	-1.97808
KRTAP4-11	keratin associated protein 4-11(KRTAP4-11)	2.27838	A_24_P306964	unknown	-1.97605
XLOC_005939	unknown	2.25518	A_33_P3230073	unknown	-1.9714
A_33_P3239102	unknown	2.24126	C2orf68	chromosome 2 open reading frame 68(C2orf68)	-1.97079
TBCD	tubulin folding cofactor D(TBCD)	2.2294	RRAGC	Ras related GTP binding C(RRAGC)	-1.95675
ITSN2	intersectin 2(ITSN2)	2.22383	PRKCI	protein kinase C iota(PRKCI)	-1.95439
TMEM203	transmembrane protein 203(TMEM203)	2.21991	TBP	TATA-box binding protein(TBP)	-1.94467
NPLOC4	NPL4 homolog, ubiquitin recognition factor(NPLOC4)	2.21148	A_33_P3351775	unknown	-1.92569
ND5	NADH dehydrogenase, subunit 5 (complex I)(ND5)	2.18738	TRAM1	translocation associated membrane protein 1(TRAM1)	-1.91071
EEF1A1	eukaryotic translation elongation factor 1 alpha 1(EEF1A1)	2.18383	SNRPD3	small nuclear ribonucleoprotein D3 polypeptide(SNRPD3)	-1.90307
A_33_P3407564	unknown	2.18019	FRMD4B	FERM domain containing 4B(FRMD4B)	-1.8919
PGD	phosphogluconate dehydrogenase(PGD)	2.17025	FAM46A	family with sequence similarity 46 member A(FAM46A)	-1.87551
XLOC_009911	uncharacterized LOC105500240(XLOC_009911)	2.16846	Z48511	unknown	-1.86684
THC2524986	unknown	2.15732	JPH3	junctophilin 3(JPH3)	-1.86637
CAP1	adenylate cyclase associated protein 1(CAP1)	2.14473	A_24_P409402	unknown	-1.86547
FLJ30838	unknown	2.12399	PARD6G	par-6 family cell polarity regulator gamma(PARD6G)	-1.86016
THC2593778	unknown	2.12097	SNRPD2	small nuclear ribonucleoprotein D2 polypeptide(SNRPD2)	-1.85743
A_33_P3325336	unknown	2.08146	SERTAD3	SERTA domain containing 3(SERTAD3)	-1.85389
RFX8	RFX family member 8, lacking RFX DNA binding domain(RFX8)	2.07807	ARL13B	ADP ribosylation factor like GTPase 13B(ARL13B)	-1.85093
SPG7	SPG7, paraplegin matrix AAA peptidase subunit(SPG7)	2.07604	C17orf85	Chromosome 17 Open Reading Frame 85	-1.84958
GSG2	germ cell associated 2, haspin(GSG2)	2.07284	TSN	translin(TSN)	-1.84756
RAI1	retinoic acid induced 1(RAI1)	2.06342	DPM1	dolichyl-phosphate mannosyltransferase subunit 1, catalytic(DPM1)	-1.82749
NOMO1	NODAL modulator 1(NOMO1)	2.06205	A_24_P306469	unknown	-1.82524
ND2	MTND2(ND2)	2.05972	ASAP1	ArfGAP with SH3 domain, ankyrin repeat and PH domain 1(ASAP1)	-1.8245
CRCP	CGRP receptor component(CRCP)	2.04186	THC2759738	unknown	-1.82424
HIST1H2AC	histone cluster 1 H2A family member c(HIST1H2AC)	2.02656	NHLRC3	NHL repeat containing 3(NHLRC3)	-1.81428
RPL32P3	ribosomal protein L32 pseudogene 3(RPL32P3)	2.01243	TAF1B	TATA-box binding protein associated factor, RNA polymerase I subunit B(TAF1B)	-1.81307
LOC645752	golgin A6 family member A pseudogene(LOC645752)	2.01052	TTC13	tetratricopeptide repeat domain 13(TTC13)	-1.81271
ADD1	adducin 1(ADD1)	2.00224	POC1B	POC1 centriolar protein B(POC1B)	-1.81121
LOC100509105	unknown	1.99912	SATB2	SATB homeobox 2(SATB2)	-1.8097
ADAT2	adenosine deaminase, tRNA specific 2(ADAT2)	1.99627	KLHDC1	kelch domain containing 1(KLHDC1)	-1.8059
LGALS3BP	galectin 3 binding protein(LGALS3BP)	1.99328	OSTCP1	oligosaccharyltransferase complex subunit pseudogene 1(OSTCP1)	-1.80446
NDUFA10	NADH:ubiquinone oxidoreductase subunit A10(NDUFA10)	1.99241	EXOSC3	exosome component 3(EXOSC3)	-1.80401
DKFZp686O1327	Testis Expressed 41 (Non-Protein Coding), Long Intergenic Non-Protein Coding RNA 953	1.99167	SLC30A7	solute carrier family 30 member 7(SLC30A7)	-1.79942
LOC401557	uncharacterized LOC401557(LOC401557)	1.99001	C17orf81	Chromosome 17 Open Reading Frame 81	-1.79689
VEZF1	vascular endothelial zinc finger 1(VEZF1)	1.98851	A_33_P3354728	unknown	-1.79485
LOC100509213	unknown	1.98738	RTN3	reticulon 3(RTN3)	-1.79425
PRMT5	protein arginine methyltransferase 5(PRMT5)	1.9731	SNORD15B	small nucleolar RNA, C/D box 15B(SNORD15B)	-1.79137
GAS6	growth arrest specific 6(GAS6)	1.95979	RNU12	RNA, U12 small nuclear(RNU12)	-1.78873
XLOC_l2_006609	unknown	1.9594	C15orf42	Chromosome 15 Open Reading Frame 42	-1.78323
PPARG	peroxisome proliferator activated receptor gamma(PPARG)	1.95774	SNORA64	small nucleolar RNA, H/ACA box 64(SNORA64)	-1.7816
LOC100507645	unknown	1.95369	SAMD13	sterile alpha motif domain containing 13(SAMD13)	-1.77715
XLOC_005338	unknown	1.93994	NOC3L	NOC3 like DNA replication regulator(NOC3L)	-1.77559
AFG3L2	AFG3 like matrix AAA peptidase subunit 2(AFG3L2)	1.9371	IDH3A	isocitrate dehydrogenase 3 (NAD(+)) alpha(IDH3A)	-1.77342
SH3BP2	SH3 domain binding protein 2(SH3BP2)	1.92467	BAZ2B	bromodomain adjacent to zinc finger domain 2B(BAZ2B)	-1.76966
SPPL2B	signal peptide peptidase like 2B(SPPL2B)	1.91672	SYPL1	synaptophysin like 1(SYPL1)	-1.76839
AGAP7	ArfGAP With GTPase Domain, Ankyrin Repeat And PH Domain 7, Pseudogene	1.91124	A_24_P255654	unknown	-1.76438
AVL9	AVL9 cell migration associated(AVL9)	1.91049	MKI67IP	Nucleolar Protein Interacting With The FHA Domain Of MKI67	-1.76231
A_33_P3347049	unknown	1.90941	CDKN1B	cyclin dependent kinase inhibitor 1B(CDKN1B)	-1.76115
IST1	IST1, ESCRT-III associated factor(IST1)	1.89558	SAFB2	scaffold attachment factor B2(SAFB2)	-1.76061
LOC100130051	uncharacterized LOC100130051(LOC100130051)	1.89548	CCDC99	Coiled-Coil Domain-Containing Protein 99	-1.75649
A_33_P3335576	unknown	1.89225	A_33_P3385387	unknown	-1.74424
FAM168B	family with sequence similarity 168 member B(FAM168B)	1.88858	ELMO1	engulfment and cell motility 1(ELMO1)	-1.74319
FCGR1B	Fc fragment of IgG receptor Ib(FCGR1B)	1.88851	KDM3B	lysine demethylase 3B(KDM3B)	-1.74184
AGPAT6	Glycerol-3-Phosphate Acyltransferase 4	1.88706	GABPA	GA binding protein transcription factor alpha subunit(GABPA)	-1.74179
A_33_P3358347	unknown	1.88381	FASTKD3	FAST kinase domains 3(FASTKD3)	-1.74174
AHCY	adenosylhomocysteinase(AHCY)	1.87998	SNRPF	small nuclear ribonucleoprotein polypeptide F(SNRPF)	-1.74132
SHISA5	shisa family member 5(SHISA5)	1.87969	ATM	ATM serine/threonine kinase(ATM)	-1.73453
GUSBP11	glucuronidase, beta pseudogene 11(GUSBP11)	1.86796	MSH2	mutS homolog 2(MSH2)	-1.72994
BACE1	beta-secretase 1(BACE1)	1.86782	SCPEP1	serine carboxypeptidase 1(SCPEP1)	-1.72502
TRABD	TraB domain containing(TRABD)	1.8656	ETHE1	ETHE1, persulfide dioxygenase(ETHE1)	-1.72263
EXOC8	exocyst complex component 8(EXOC8)	1.86292	FOXF2	forkhead box F2(FOXF2)	-1.72139
XLOC_l2_015090	unknown	1.8579	SNAR-G2	small ILF3/NF90-associated RNA G2(SNAR-G2)	-1.71953
LOC400043	uncharacterized LOC400043(LOC400043)	1.8571	NXT2	nuclear transport factor 2 like export factor 2(NXT2)	-1.71408
ABHD12	abhydrolase domain containing 12(ABHD12)	1.84702	TSNAX	translin associated factor X(TSNAX)	-1.71158
A_33_P3390086	unknown	1.8458	TARDBP	TAR DNA binding protein(TARDBP)	-1.70381
IRAK1	interleukin 1 receptor associated kinase 1(IRAK1)	1.84112	PTMA	prothymosin, alpha(PTMA)	-1.70055
RFC2	replication factor C subunit 2(RFC2)	1.84038	TUG1	taurine up-regulated 1 (non-protein coding)(TUG1)	-1.69639
DIAPH1	diaphanous related formin 1(DIAPH1)	1.83895	SRRM1	serine and arginine repetitive matrix 1(SRRM1)	-1.69194
SLC8A1	solute carrier family 8 member A1(SLC8A1)	1.83841	A_33_P3276927	unknown	-1.69168
MGC16025	uncharacterized LOC85009(MGC16025)	1.83577	RIOK2	RIO kinase 2(RIOK2)	-1.68829
PNMA1	paraneoplastic Ma antigen 1(PNMA1)	1.83314	METTL12	methyltransferase like 12(METTL12)	-1.68196
XLOC_005737	unknown	1.83224	LOC100507540	unknown	-1.68182
MADD	MAP kinase activating death domain(MADD)	1.83181	SUPV3L1	Suv3 like RNA helicase(SUPV3L1)	-1.68141
CHST10	carbohydrate sulfotransferase 10(CHST10)	1.82355	A_24_P118472	unknown	-1.68108
HIST1H2AE	histone cluster 1 H2A family member e(HIST1H2AE)	1.82116	C1orf85	Chromosome 1 Open Reading Frame 85	-1.68008
ZHX3	zinc fingers and homeoboxes 3(ZHX3)	1.82051	ZNF236	zinc finger protein 236(ZNF236)	-1.67506
THOC5	THO complex 5(THOC5)	1.81694	FOXL2	forkhead box L2(FOXL2)	-1.67495
PSPC1	paraspeckle component 1(PSPC1)	1.81422	A_33_P3418496	unknown	-1.66569
A_33_P3397298	unknown	1.8098	KHDRBS1	KH RNA binding domain containing, signal transduction associated 1(KHDRBS1)	-1.66146
WDR1	WD repeat domain 1(WDR1)	1.80804	PCGF5	polycomb group ring finger 5(PCGF5)	-1.65967
PIGS	phosphatidylinositol glycan anchor biosynthesis class S(PIGS)	1.80657	THC2610134	unknown	-1.65838
DAP	death associated protein(DAP)	1.80611	NPEPPS	aminopeptidase puromycin sensitive(NPEPPS)	-1.65762
RRBP1	ribosome binding protein 1(RRBP1)	1.80602	ZC3H6	zinc finger CCCH-type containing 6(ZC3H6)	-1.6555
MAN2B2	mannosidase alpha class 2B member 2(MAN2B2)	1.80374	XPO4	exportin 4(XPO4)	-1.65537
SET	SET nuclear proto-oncogene(SET)	1.79935	PRR3	proline rich 3(PRR3)	-1.65105
ENDOV	endonuclease V(ENDOV)	1.79873	PGAP2	post-GPI attachment to proteins 2(PGAP2)	-1.64683
CD164	CD164 molecule(CD164)	1.79796	CEP76	centrosomal protein 76(CEP76)	-1.64667
LSM14B	LSM family member 14B(LSM14B)	1.79666	CXorf48	Chromosome X Open Reading Frame 48	-1.64411
NP106139	unknown	1.79652	BAZ1A	bromodomain adjacent to zinc finger domain 1A(BAZ1A)	-1.64158
SLC35E3	solute carrier family 35 member E3(SLC35E3)	1.79555	DGKZ	diacylglycerol kinase zeta(DGKZ)	-1.63936
NRSN2	neurensin 2(NRSN2)	1.79534	PAQR3	progestin and adipoQ receptor family member 3(PAQR3)	-1.63376
KIAA0748	Thymocyte Expressed, Positive Selection Associated 1	1.79287	PPP1R3C	protein phosphatase 1 regulatory subunit 3C(PPP1R3C)	-1.63337
XLOC_l2_012388	unknown	1.7913	ARFGEF2	ADP ribosylation factor guanine nucleotide exchange factor 2(ARFGEF2)	-1.63317
LOC286109	unknown	1.79095	USP10	ubiquitin specific peptidase 10(USP10)	-1.63226
RRP12	ribosomal RNA processing 12 homolog(RRP12)	1.7899	BRCA1	BRCA1, DNA repair associated(BRCA1)	-1.63004
WBSCR16	Williams-Beuren Syndrome Chromosomal Region 16 Protein	1.78954	TXNDC5	thioredoxin domain containing 5(TXNDC5)	-1.62862
PMS2	PMS1 homolog 2, mismatch repair system component(PMS2)	1.78719	TRRAP	transformation/transcription domain associated protein(TRRAP)	-1.62789
APP	amyloid beta precursor protein(APP)	1.78579	SNORD37	small nucleolar RNA, C/D box 37(SNORD37)	-1.62647
KIF13B	kinesin family member 13B(KIF13B)	1.78382	CCNJ	cyclin J(CCNJ)	-1.62577
HIST1H2BC	histone cluster 1 H2B family member c(HIST1H2BC)	1.7837	RALA	RAS like proto-oncogene A(RALA)	-1.62089
IMPA2	inositol monophosphatase 2(IMPA2)	1.78226	ROCK2	Rho associated coiled-coil containing protein kinase 2(ROCK2)	-1.6197
IKBKE	inhibitor of kappa light polypeptide gene enhancer in B-cells, kinase epsilon(IKBKE)	1.78209	A_33_P3375950	unknown	-1.6194
XLOC_l2_008203	unknown	1.78202	LGR4	leucine rich repeat containing G protein-coupled receptor 4(LGR4)	-1.61579
CCDC9	coiled-coil domain containing 9(CCDC9)	1.78078	FEM1C	fem-1 homolog C(FEM1C)	-1.61419
FGFR1	fibroblast growth factor receptor 1(FGFR1)	1.78022	E2F3	E2F transcription factor 3(E2F3)	-1.61412
NGRN	neugrin, neurite outgrowth associated(NGRN)	1.77861	MYBL1	MYB proto-oncogene like 1(MYBL1)	-1.61109
KIAA1958	KIAA1958(KIAA1958)	1.77678	AGAP2	ArfGAP with GTPase domain, ankyrin repeat and PH domain 2(AGAP2)	-1.60777
APEH	acylaminoacyl-peptide hydrolase(APEH)	1.77464	NARS	asparaginyl-tRNA synthetase(NARS)	-1.60526
ND3	NADH dehydrogenase, subunit 3 (complex I)(ND3)	1.77425	UBE2G1	ubiquitin conjugating enzyme E2 G1(UBE2G1)	-1.60476
LIMK2	LIM domain kinase 2(LIMK2)	1.77316	LOC100507462	unknown	-1.60336
PGAM1	phosphoglycerate mutase 1(PGAM1)	1.76968	A_24_P143843	unknown	-1.60026
FUBP3	far upstream element binding protein 3(FUBP3)	1.76874	C15orf63	Chromosome 15 Open Reading Frame 63	-1.59929
LOC100507418	unknown	1.76586	XLOC_000707	unknown	-1.59877
IL6R	interleukin 6 receptor(IL6R)	1.75927	SLC25A29	solute carrier family 25 member 29(SLC25A29)	-1.59735
QSOX2	quiescin sulfhydryl oxidase 2(QSOX2)	1.75881	P2RY1	purinergic receptor P2Y1(P2RY1)	-1.59192
A_24_P84608	unknown	1.75767	RAB23	RAB23, member RAS oncogene family(RAB23)	-1.59082
RHEB	Ras homolog enriched in brain(RHEB)	1.75171	C11orf57	chromosome 11 open reading frame 57(C11orf57)	-1.59059
QSOX1	quiescin sulfhydryl oxidase 1(QSOX1)	1.75139	LOC100506994	unknown	-1.58968
POLE	DNA polymerase epsilon, catalytic subunit(POLE)	1.74578	LEPRE1	Leucine Proline-Enriched Proteoglycan (Leprecan) 1	-1.58737
CTSC	cathepsin C(CTSC)	1.74319	TDRD7	tudor domain containing 7(TDRD7)	-1.58723
TLN1	talin 1(TLN1)	1.74009	THG1L	tRNA-histidine guanylyltransferase 1 like(THG1L)	-1.58586
LRRFIP1	LRR binding FLII interacting protein 1(LRRFIP1)	1.7351	CXCL5	C-X-C motif chemokine ligand 5(CXCL5)	-1.58584
C12orf51	HECT Domain Containing E3 Ubiquitin Protein Ligase 4	1.7336	NP1252193	unknown	-1.58482
E2F4		1.72819	SNORA28	small nucleolar RNA, H/ACA box 28(SNORA28)	-1.58429
ZNF282	zinc finger protein 282(ZNF282)	1.72688	XLOC_008436	unknown	-1.58414
UCKL1	uridine-cytidine kinase 1 like 1(UCKL1)	1.72655	C2CD4B	C2 calcium dependent domain containing 4B(C2CD4B)	-1.57941
LOC647979	unknown	1.72637	PBXIP1	PBX homeobox interacting protein 1(PBXIP1)	-1.57863
A_33_P3365666	unknown	1.72573	TM9SF4	transmembrane 9 superfamily member 4(TM9SF4)	-1.57789
LOC100508202	unknown	1.72532	RAD54B	RAD54 homolog B (S. cerevisiae)(RAD54B)	-1.57744
HIST1H4I	histone cluster 1 H4 family member i(HIST1H4I)	1.7244	DDX6	DEAD-box helicase 6(DDX6)	-1.57704
HIST2H4B	histone cluster 2 H4 family member b(HIST2H4B)	1.72268	XLOC_005561	unknown	-1.57682
SECISBP2	SECIS binding protein 2(SECISBP2)	1.72168	RCBTB1	RCC1 and BTB domain containing protein 1(RCBTB1)	-1.57677
PRKAB1	protein kinase AMP-activated non-catalytic subunit beta 1(PRKAB1)	1.72059	NFIA	nuclear factor I A(NFIA)	-1.57521
A_33_P3362567	unknown	1.71693	STX10	syntaxin 10(STX10)	-1.5715
GGT1	gamma-glutamyltransferase 1(GGT1)	1.7161	GNAI1	G protein subunit alpha i1(GNAI1)	-1.5703
LOC84856	unknown	1.71527	UBE2Z	ubiquitin conjugating enzyme E2 Z(UBE2Z)	-1.57006
A_33_P3226788	unknown	1.7149	ZNF542	Zinc Finger Protein 542, Pseudogene	-1.56944
FOXI2	forkhead box I2(FOXI2)	1.71381	GOLGA5	golgin A5(GOLGA5)	-1.56687
MAFK	MAF bZIP transcription factor K(MAFK)	1.71322	R3HDM2	R3H domain containing 2(R3HDM2)	-1.56547
PBX2	PBX homeobox 2(PBX2)	1.70895	POLD3	DNA polymerase delta 3, accessory subunit(POLD3)	-1.56269
ZNF266	zinc finger protein 266(ZNF266)	1.70871	SNORA26	small nucleolar RNA, H/ACA box 26(SNORA26)	-1.56036
STXBP2	syntaxin binding protein 2(STXBP2)	1.70824	ENST00000543306	unknown	-1.56032
H1F0	H1 histone family member 0(H1F0)	1.70621	SNX6	sorting nexin 6(SNX6)	-1.55901
C17orf62	chromosome 17 open reading frame 62(C17orf62)	1.70328	LOC100506686	unknown	-1.55777
AHCYL1	adenosylhomocysteinase like 1(AHCYL1)	1.70257	TAF4B	TATA-box binding protein associated factor 4b(TAF4B)	-1.5576
DISC1	disrupted in schizophrenia 1(DISC1)	1.70198	THUMPD2	THUMP domain containing 2(THUMPD2)	-1.55726
LOC399744	unknown	1.69922	ANXA7	annexin A7(ANXA7)	-1.55634
ATP5C1	ATP synthase, H+ transporting, mitochondrial F1 complex, gamma polypeptide 1(ATP5C1)	1.69864	POLR2H	RNA polymerase II subunit H(POLR2H)	-1.55396
TACC3	transforming acidic coiled-coil containing protein 3(TACC3)	1.69782	LOC400684	uncharacterized LOC400684(LOC400684)	-1.55055
RBCK1	RANBP2-type and C3HC4-type zinc finger containing 1(RBCK1)	1.6938	SLC13A2	solute carrier family 13 member 2(SLC13A2)	-1.55027
GNPDA1	glucosamine-6-phosphate deaminase 1(GNPDA1)	1.69263	RAB22A	RAB22A, member RAS oncogene family(RAB22A)	-1.54997
AKIRIN2	akirin 2(AKIRIN2)	1.69203	MYC	v-myc avian myelocytomatosis viral oncogene homolog(MYC)	-1.54909
L3MBTL2	L3MBTL2 polycomb repressive complex 1 subunit(L3MBTL2)	1.69104	IGFBP2	insulin like growth factor binding protein 2(IGFBP2)	-1.54821
NAAA	N-acylethanolamine acid amidase(NAAA)	1.68843	CENPH	centromere protein H(CENPH)	-1.54812
YBX1	Y-box binding protein 1(YBX1)	1.68744	QRSL1	glutaminyl-tRNA synthase (glutamine-hydrolyzing)-like 1(QRSL1)	-1.54746
C20orf3	chromosome 6 open reading frame 106(C6orf106)	1.68671	NMI	N-myc and STAT interactor(NMI)	-1.5473
LOC100133050	glucuronidase beta pseudogene(LOC100133050)	1.6858	HMG20A	high mobility group 20A(HMG20A)	-1.54727
MAP4	microtubule associated protein 4(MAP4)	1.68564	C9orf40	chromosome 9 open reading frame 40(C9orf40)	-1.5458
DDX19B	DEAD-box helicase 19B(DDX19B)	1.68516	XLOC_007167	unknown	-1.54538
PABPC4	poly(A) binding protein cytoplasmic 4(PABPC4)	1.68489	CEBPB	CCAAT/enhancer binding protein beta(CEBPB)	-1.545
HIST1H2BB	histone cluster 1 H2B family member b(HIST1H2BB)	1.68394	OSGEP	O-sialoglycoprotein endopeptidase(OSGEP)	-1.5436
LOC731275	unknown	1.68255	MAPK8	mitogen-activated protein kinase 8(MAPK8)	-1.53853
POLR3H	RNA polymerase III subunit H(POLR3H)	1.68191	TRIP11	thyroid hormone receptor interactor 11(TRIP11)	-1.53635
PCCB	propionyl-CoA carboxylase beta subunit(PCCB)	1.68092	PRKD3	protein kinase D3(PRKD3)	-1.53619
BTBD7	BTB domain containing 7(BTBD7)	1.67994	CLCN4	chloride voltage-gated channel 4(CLCN4)	-1.5342
KIF4A	kinesin family member 4A(KIF4A)	1.67871	KIAA0232	KIAA0232(KIAA0232)	-1.53306
C7orf74	Coiled-Coil Domain Containing 71-Like	1.67724	RMI1	RecQ mediated genome instability 1(RMI1)	-1.53248
AMD1	adenosylmethionine decarboxylase 1(AMD1)	1.67658	A_24_P195724	unknown	-1.53183
B4GALT1	beta-1,4-galactosyltransferase 1(B4GALT1)	1.67526	FAM175B	family with sequence similarity 175 member B(FAM175B)	-1.5304
BTN2A1	butyrophilin subfamily 2 member A1(BTN2A1)	1.67439	PFDN2	prefoldin subunit 2(PFDN2)	-1.52808
SDHA	succinate dehydrogenase complex flavoprotein subunit A(SDHA)	1.67417	R3HDM1	R3H domain containing 1(R3HDM1)	-1.52705
PECAM1	platelet and endothelial cell adhesion molecule 1(PECAM1)	1.67291	FNBP4	formin binding protein 4(FNBP4)	-1.52441
ATG13	autophagy related 13(ATG13)	1.67093	ZNF107	zinc finger protein 107(ZNF107)	-1.52426
CTNNA1	catenin alpha 1(CTNNA1)	1.67019	PTPN14	protein tyrosine phosphatase, non-receptor type 14(PTPN14)	-1.52114
MTHFD1L	methylenetetrahydrofolate dehydrogenase (NADP+ dependent) 1-like(MTHFD1L)	1.66861	EVI5	ecotropic viral integration site 5(EVI5)	-1.52075
TOP3A	topoisomerase (DNA) III alpha(TOP3A)	1.66746	SLC44A1	solute carrier family 44 member 1(SLC44A1)	-1.51998
LOC100132832	unknown	1.667	TOB2	transducer of ERBB2, 2(TOB2)	-1.51842
TYK2	tyrosine kinase 2(TYK2)	1.6653	XLOC_006561	unknown	-1.51669
IRF1	interferon regulatory factor 1(IRF1)	1.66424	CIT	citron rho-interacting serine/threonine kinase(CIT)	-1.51606
GOLGA7	golgin A7(GOLGA7)	1.66384	AGL	amylo-alpha-1, 6-glucosidase, 4-alpha-glucanotransferase(AGL)	-1.51354
NUS1	NUS1 dehydrodolichyl diphosphate synthase subunit(NUS1)	1.66312	ATP11C	ATPase phospholipid transporting 11C(ATP11C)	-1.51283
WDR3	WD repeat domain 3(WDR3)	1.66296	BST2	bone marrow stromal cell antigen 2(BST2)	-1.51263
XLOC_011103	unknown	1.6607	GIN1	gypsy retrotransposon integrase 1(GIN1)	-1.51139
NF1	neurofibromin 1(NF1)	1.66018	S100A4	S100 calcium binding protein A4(S100A4)	-1.50832
SCAMP2	secretory carrier membrane protein 2(SCAMP2)	1.65916	USP8	ubiquitin specific peptidase 8(USP8)	-1.50636
TPCN1	two pore segment channel 1(TPCN1)	1.65802	FAM124B	family with sequence similarity 124 member B(FAM124B)	-1.50534
TRIM35	tripartite motif containing 35(TRIM35)	1.65661	EIF4A1	eukaryotic translation initiation factor 4A1(EIF4A1)	-1.50451
LINC00174	long intergenic non-protein coding RNA 174(LINC00174)	1.65654	A_33_P3246995	unknown	-1.50265
LOC220729	succinate dehydrogenase complex flavoprotein subunit A pseudogene(LOC220729)	1.65574	COQ3	coenzyme Q3, methyltransferase(COQ3)	-1.50031
RAB44	RAB44, member RAS oncogene family(RAB44)	1.65372
TMEM201	transmembrane protein 201(TMEM201)	1.65356
NSFL1C	NSFL1 cofactor(NSFL1C)	1.6511
HIST1H2BD	histone cluster 1 H2B family member d(HIST1H2BD)	1.6491
PLK1	polo like kinase 1(PLK1)	1.64872
KCNQ1	potassium voltage-gated channel subfamily Q member 1(KCNQ1)	1.64815
PIAS1	protein inhibitor of activated STAT 1(PIAS1)	1.64693
PSMD13	proteasome 26S subunit, non-ATPase 13(PSMD13)	1.64668
ATP8B2	ATPase phospholipid transporting 8B2(ATP8B2)	1.64557
SIAE	sialic acid acetylesterase(SIAE)	1.6436
ENST00000356801	unknown	1.64308
ARHGAP35	Rho GTPase activating protein 35(ARHGAP35)	1.64271
TUBGCP2	tubulin gamma complex associated protein 2(TUBGCP2)	1.64253
ACTBL2	actin, beta like 2(ACTBL2)	1.64189
SNX9	sorting nexin 9(SNX9)	1.64134
ARHGAP30	Rho GTPase activating protein 30(ARHGAP30)	1.64085
TXNRD1	thioredoxin reductase 1(TXNRD1)	1.63863
ST13	suppression of tumorigenicity 13 (colon carcinoma) (Hsp70 interacting protein)(ST13)	1.63813
ZNF124	zinc finger protein 124(ZNF124)	1.6378
NFX1	nuclear transcription factor, X-box binding 1(NFX1)	1.63615
MYD88	myeloid differentiation primary response 88(MYD88)	1.6359
ELL	elongation factor for RNA polymerase II(ELL)	1.63397
GTF3C4	general transcription factor IIIC subunit 4(GTF3C4)	1.63331
LOC283270	uncharacterized LOC283270(LOC283270)	1.63187
A_32_P918263	unknown	1.63127
LRPAP1	LDL receptor related protein associated protein 1(LRPAP1)	1.63093
WWP2	WW domain containing E3 ubiquitin protein ligase 2(WWP2)	1.62926
LOC389834	ankyrin repeat domain 57 pseudogene(LOC389834)	1.62586
SLC4A2	solute carrier family 4 member 2(SLC4A2)	1.62303
ENST00000444694	unknown	1.62271
TYW1B	tRNA-yW synthesizing protein 1 homolog B(TYW1B)	1.62203
TSPYL4	TSPY like 4(TSPYL4)	1.62133
TUBA1A	tubulin alpha 1a(TUBA1A)	1.62061
PI4KAP2	phosphatidylinositol 4-kinase alpha pseudogene 2(PI4KAP2)	1.61919
KGFLP1	Fibroblast Growth Factor 7 Pseudogene 6	1.61545
SLC35E1	solute carrier family 35 member E1(SLC35E1)	1.61541
C6orf106	Chromosome 6 Open Reading Frame 106, Uncharacterized Protein C6orf106	1.61513
ERCC2	ERCC excision repair 2, TFIIH core complex helicase subunit(ERCC2)	1.61504
NAMPT	nicotinamide phosphoribosyltransferase(NAMPT)	1.61217
FTSJ1	FtsJ RNA methyltransferase homolog 1 (E. coli)(FTSJ1)	1.61032
SHC1	SHC adaptor protein 1(SHC1)	1.6083
AGAP3	ArfGAP with GTPase domain, ankyrin repeat and PH domain 3(AGAP3)	1.60808
A_33_P3351524	unknown	1.60761
XLOC_012332	unknown	1.60734
RBM23	RNA binding motif protein 23(RBM23)	1.60501
XLOC_014110	unknown	1.60114
XLOC_l2_002502	unknown	1.60098
XLOC_001048	unknown	1.59966
HIST2H3D	histone cluster 2 H3 family member d(HIST2H3D)	1.59914
ERLIN2	ER lipid raft associated 2(ERLIN2)	1.59859
ANKLE2	ankyrin repeat and LEM domain containing 2(ANKLE2)	1.59627
CNTD2	cyclin N-terminal domain containing 2(CNTD2)	1.59614
HIST1H2BK	histone cluster 1 H2B family member k(HIST1H2BK)	1.59609
ALKBH3	alkB homolog 3, alpha-ketoglutaratedependent dioxygenase(ALKBH3)	1.59308
TMBIM1	transmembrane BAX inhibitor motif containing 1(TMBIM1)	1.59205
FTSJ2	FtsJ RNA Methyltransferase Homolog 2	1.59131
TJP2	tight junction protein 2(TJP2)	1.59084
FLJ32255	uncharacterized LOC643977(FLJ32255)	1.59083
TGOLN2	trans-golgi network protein 2(TGOLN2)	1.58907
KAT7	lysine acetyltransferase 7(KAT7)	1.58802
STIL	SCL/TAL1 interrupting locus(STIL)	1.58765
PEA15	phosphoprotein enriched in astrocytes 15(PEA15)	1.58711
LOC100128703	uncharacterized LOC100128703(LOC100128703)	1.58685
NR2C2	nuclear receptor subfamily 2 group C member 2(NR2C2)	1.58609
NUP93	nucleoporin 93(NUP93)	1.58347
XLOC_l2_001731	unknown	1.58311
UBE3B	ubiquitin protein ligase E3B(UBE3B)	1.58231
LRP5	LDL receptor related protein 5(LRP5)	1.58201
BUD31	BUD31 homolog(BUD31)	1.58146
NRBP2	nuclear receptor binding protein 2(NRBP2)	1.58083
DPP9	dipeptidyl peptidase 9(DPP9)	1.58026
CERK	ceramide kinase(CERK)	1.57977
LAIR1	leukocyte associated immunoglobulin like receptor 1(LAIR1)	1.57931
CHD4	chromodomain helicase DNA binding protein 4(CHD4)	1.5793
PAPOLA	poly(A) polymerase alpha(PAPOLA)	1.57866
RAB5C	RAB5C, member RAS oncogene family(RAB5C)	1.57699
SEMA4A	semaphorin 4A(SEMA4A)	1.5748
HVCN1	hydrogen voltage gated channel 1(HVCN1)	1.57424
FAM134A	family with sequence similarity 134 member A(FAM134A)	1.57394
PNPLA6	patatin like phospholipase domain containing 6(PNPLA6)	1.57361
AFF4	AF4/FMR2 family member 4(AFF4)	1.57343
GORASP1	golgi reassembly stacking protein 1(GORASP1)	1.57165
ZDHHC18	zinc finger DHHC-type containing 18(ZDHHC18)	1.5713
A_33_P3403356	unknown	1.57125
TGFBRAP1	transforming growth factor beta receptor associated protein 1(TGFBRAP1)	1.57094
DDX39B	DExD-box helicase 39B(DDX39B)	1.57014
MYOF	myoferlin(MYOF)	1.56931
SEPT7	CDC10 Protein Homolog	1.56862
FUCA2	fucosidase, alpha-L- 2, plasma(FUCA2)	1.56658
INVS	inversin(INVS)	1.56602
UBQLN4	ubiquilin 4(UBQLN4)	1.5656
GNB2L1	Guanine Nucleotide Binding Protein (G Protein), Beta Polypeptide 2-Like 1	1.56466
LOC729737	uncharacterized LOC729737(LOC729737)	1.56353
PVT1	Pvt1 oncogene (non-protein coding)(PVT1)	1.56325
GALK1	galactokinase 1(GALK1)	1.56158
ADPGK	ADP dependent glucokinase(ADPGK)	1.55965
ZNF148	zinc finger protein 148(ZNF148)	1.55956
ARCN1	archain 1(ARCN1)	1.55855
PICALM	phosphatidylinositol binding clathrin assembly protein(PICALM)	1.55432
SNAP47	synaptosome associated protein 47(SNAP47)	1.55431
DCAF15	DDB1 and CUL4 associated factor 15(DCAF15)	1.55422
ARPC5L	actin related protein 2/3 complex subunit 5 like(ARPC5L)	1.55378
HERC2P4	hect domain and RLD 2 pseudogene 4(HERC2P4)	1.5537
EIF3F	eukaryotic translation initiation factor 3 subunit F(EIF3F)	1.55303
BCR	BCR, RhoGEF and GTPase activating protein(BCR)	1.55185
FLJ45340	unknown	1.55143
GOLGA8A	golgin A8 family member A(GOLGA8A)	1.55049
MAGED2	MAGE family member D2(MAGED2)	1.55009
PPCS	phosphopantothenoylcysteine synthetase(PPCS)	1.54954
IL17RA	interleukin 17 receptor A(IL17RA)	1.54938
TH1L	Negative Elongation Factor Complex Member C/D	1.54874
TBC1D10B	TBC1 domain family member 10B(TBC1D10B)	1.54684
VPS52	VPS52, GARP complex subunit(VPS52)	1.54661
LOC729603	calcineurin like EF-hand protein 1 pseudogene(LOC729603)	1.5441
PARP4	poly(ADP-ribose) polymerase family member 4(PARP4)	1.54337
MTRNR2L2	MT-RNR2-like 2(MTRNR2L2)	1.54319
TBL1Y	transducin beta like 1, Y-linked(TBL1Y)	1.54258
ELF4	E74 like ETS transcription factor 4(ELF4)	1.54016
MPPE1	metallophosphoesterase 1(MPPE1)	1.53987
PDXK	pyridoxal (pyridoxine, vitamin B6) kinase(PDXK)	1.53959
FLOT2	flotillin 2(FLOT2)	1.53947
CCRN4L	Carbon Catabolite Repression 4-Like Protein	1.53926
HOXA6	homeobox A6(HOXA6)	1.53914
GXYLT1	glucoside xylosyltransferase 1(GXYLT1)	1.53727
TBC1D9B	TBC1 domain family member 9B(TBC1D9B)	1.53677
LOC401357	uncharacterized LOC401357(LOC401357)	1.53608
IMMT	inner membrane mitochondrial protein(IMMT)	1.53476
ZNF729	zinc finger protein 729(ZNF729)	1.5344
CYB5R4	cytochrome b5 reductase 4(CYB5R4)	1.53423
A_33_P3409294	unknown	1.53333
ZNF85	zinc finger protein 85(ZNF85)	1.5332
LOC441666	zinc finger protein 91 pseudogene(LOC441666)	1.53312
TMEM18	transmembrane protein 18(TMEM18)	1.53239
ACIN1	apoptotic chromatin condensation inducer 1(ACIN1)	1.53215
LAMP2	lysosomal associated membrane protein 2(LAMP2)	1.53154
ZNF544	zinc finger protein 544(ZNF544)	1.53105
DHDDS	dehydrodolichyl diphosphate synthase subunit(DHDDS)	1.52811
NBPF10	neuroblastoma breakpoint family member 10(NBPF10)	1.52605
CC2D1B	coiled-coil and C2 domain containing 1B(CC2D1B)	1.52298
CCDC115	coiled-coil domain containing 115(CCDC115)	1.5225
AIF1L	allograft inflammatory factor 1 like(AIF1L)	1.5195
NADK	NAD kinase(NADK)	1.51899
FAM21C	family with sequence similarity 21 member C(FAM21C)	1.51805
ENST00000390549	unknown	1.51654
ARF1	ADP ribosylation factor 1(ARF1)	1.51564
YTHDF1	YTH N6-methyladenosine RNA binding protein 1(YTHDF1)	1.51562
C22orf28	Chromosome 22 Open Reading Frame 28	1.51519
ANKMY1	ankyrin repeat and MYND domain containing 1(ANKMY1)	1.51216
TANK	TRAF family member associated NFKB activator(TANK)	1.51171
ADAT1	adenosine deaminase, tRNA specific 1(ADAT1)	1.5112
KIAA1530	UV Stimulated Scaffold Protein A	1.51056
ZNF814	zinc finger protein 814(ZNF814)	1.51054
LOC100506190	unknown	1.50912
SETD4	SET domain containing 4(SETD4)	1.50908
LOC100506866	unknown	1.50827
CA2	carbonic anhydrase 2(CA2)	1.50814
ALMS1	ALMS1, centrosome and basal body associated protein(ALMS1)	1.50708
MAML1	mastermind like transcriptional coactivator 1(MAML1)	1.50619
ENST00000427415	unknown	1.50611
LOC442028	uncharacterized LOC442028(LOC442028)	1.50533
MAPK13	mitogen-activated protein kinase 13(MAPK13)	1.50514
NPHS2	NPHS2, podocin(NPHS2)	1.50301
RPS6	ribosomal protein S6(RPS6)	1.50257
AP1B1	adaptor related protein complex 1 beta 1 subunit(AP1B1)	1.50216
MAFF	MAF bZIP transcription factor F(MAFF)	1.50167
CRTC3	CREB regulated transcription coactivator 3(CRTC3)	1.50071

## Sheet: Table S10
Table S10: Full list of up- and down-regulated genes following 4h-exposure to 1.4 µM of encapsulated GSNO (corresponding to GNP 50 µg/mL) which at least 1.5-Fold Change and p ≤ 0.001.
Genes UP 33			Genes DOWN 14
Gene symbol	Gene Name	Fold Change	Gene symbol	Gene Name	Fold Change
LOC400958	uncharacterized LOC400958(LOC400958)	2.69533	PPP2R5B	protein phosphatase 2 regulatory subunit B'beta(PPP2R5B)	-1.64623
TBC1D2	TBC1 domain family member 2(TBC1D2)	2.53612	TSPAN7	tetraspanin 7(TSPAN7)	-1.59288
STARD13	StAR related lipid transfer domain containing 13(STARD13)	2.31009	VIPR1	vasoactive intestinal peptide receptor 1(VIPR1)	-1.56331
ST3GAL6	ST3 beta-galactoside alpha-2,3-sialyltransferase 6(ST3GAL6)	2.22789	PDZD7	PDZ domain containing 7(PDZD7)	-1.56117
TGFBR1	transforming growth factor beta receptor 1(TGFBR1)	2.20783	LINC00202	unknown	-1.56039
SETBP1	SET binding protein 1(SETBP1)	2.10267	C2CD4A	C2 calcium dependent domain containing 4A(C2CD4A)	-1.54326
XLOC_012641	unknown	1.85623	NMBR	neuromedin B receptor(NMBR)	-1.53966
GAS2L3	growth arrest specific 2 like 3(GAS2L3)	1.80557	XLOC_008882	unknown	-1.53497
MAFF	MAF bZIP transcription factor F(MAFF)	1.80471	ARSE	arylsulfatase E (chondrodysplasia punctata 1)(ARSE)	-1.5307
LONRF3	LON peptidase N-terminal domain and ring finger 3(LONRF3)	1.79042	LOC283089	unknown	-1.51689
STX3	syntaxin 3(STX3)	1.77262	GAPT	GRB2 binding adaptor protein, transmembrane(GAPT)	-1.5142
TIMP3	TIMP metallopeptidase inhibitor 3(TIMP3)	1.7298	MFAP3L	microfibrillar associated protein 3 like(MFAP3L)	-1.51118
SLC7A11	transforming growth factor beta receptor 1(TGFBR1)	1.6906	KAZALD1	Kazal type serine peptidase inhibitor domain 1(KAZALD1)	-1.51006
SLC17A5	solute carrier family 17 member 5(SLC17A5)	1.65899	XLOC_l2_007088	unknown	-1.50847
SETDB2	SET domain bifurcated 2(SETDB2)	1.6509
LOC100130876	uncharacterized LOC100130876(LOC100130876)	1.58363
FNDC3B	Fibronectin Type III Domain Containing 3B	1.58332
ASAH1	N-acylsphingosine amidohydrolase 1(ASAH1)	1.56992
TMEM192	transmembrane protein 192(TMEM192)	1.56642
PLAU	plasminogen activator, urokinase(PLAU)	1.55782
XLOC_007535	unknown	1.55349
CD109	CD109 molecule(CD109)	1.54948
A_33_P3224338	unknown	1.53158
TRAF5	TNF receptor associated factor 5(TRAF5)	1.53141
C14orf109	Chromosome 14 Open Reading Frame 109	1.52992
PRDM8	PR/SET domain 8(PRDM8)	1.52904
NSMAF	neutral sphingomyelinase activation associated factor(NSMAF)	1.52303
C12orf35	Chromosome 12 Open Reading Frame 35	1.52124
XLOC_006512	unknown	1.51207
XLOC_014366	unknown	1.51026
FLJ42280	unknown	1.50297
SIGLEC6	sialic acid binding Ig like lectin 6(SIGLEC6)	1.50178
SLC16A12	solute carrier family 16 member 12(SLC16A12)	1.50128

[truncated: 6 more sheets: Table S11, Table S12, Table S13, Table S14, Table S15, Table S16]
